# Supplementary material for: Human cell-dependent, directional, time-dependent changes in the mono- and oligonucleotide compositions of SARS-CoV-2 genomes
Source: BMC Microbiol. 2021 Mar 23;21:89. doi: 10.1186/s12866-021-02158-6 (PMC7987243; doi:10.1186/s12866-021-02158-6)
Supplement: Supplementary file 2 — Additional file 2: Table S1. List of SARS-CoV-2 strains used in the analysis. Table S2. List of human-and bat-CoV strains used in the analysis. Table S3. Number of SARS-CoV-2 strains in each clade isolated in each elapsed month. Table S4. Average oligonucleotide compositions for SARS-CoV-2 strains in each clade isolated in each elapsed month. Table S5. Correlation coefficients for time-dependent changes in oligonucleotide compositions of SARS-CoV-2. Table S6. Fold change in compositions between strains of the first and last month of the analysis. Table S7. Distance between the oligonucleotide composition of SARS-CoV-2 isolated in each elapsed month and that of human-CoV. Table S8. Correlation coefficients for time-series changes in the distance between oligonucleotide compositions of SARS-CoV-2 and human-CoV. Table S9. List of RNA-binding motifs. Table S10. Numbers of motif-containing loci for RNA-binding proteins whose abundance increases or decreases between strains of the first and last month of the analysis. Table S11. P-value from t-test to analyze the number of RNA-binding motif loci whose abundance increases or decreases between strains of the first and last month of the analysis. Table S12. Correlation coefficients for time-dependent changes in the number of loci containing RNA-binding motifs. [file 12866_2021_2158_MOESM2_ESM.xlsx]

## Sheet: title page
Human cell-dependent, directional, time-dependent changes in the mono- and oligonucleotide compositions of SARS-CoV-2 genomes
Yuki Iwasaki1, Takashi Abe2, Toshimichi Ikemura1*
*Correspondence to t_ikemura@nagahama-i-bio.ac.jp
Yuki Iwasaki	Nagahama Institute of Bio-Science and Technology. Japan
Takashi Abe	Niigata University, Japan
Toshimichi Ikemura	Nagahama Institute of Bio-Science and Technology. Japan

## Sheet: table S1
Tabls S1: List of SARS-CoV-2 strains used in the analysis.
Clade	Strain	Accession	Collection_Date	length (bp)	N length (bp)
G	hCoV-19/Argentina/C3013/2020	EPI_ISL_420598	2020_03	29854	7
G	hCoV-19/Argentina/PAIS-A0004/2020	EPI_ISL_430796	2020_03	29802	0
G	hCoV-19/Argentina/PAIS-A0007/2020	EPI_ISL_430799	2020_03	29804	0
G	hCoV-19/Argentina/PAIS-A0008/2020	EPI_ISL_430800	2020_03	29804	0
G	hCoV-19/Argentina/PAIS-A0009/2020	EPI_ISL_430801	2020_03	29795	0
G	hCoV-19/Argentina/PAIS-A0012/2020	EPI_ISL_430803	2020_04	29800	0
G	hCoV-19/Argentina/PAIS-A0013/2020	EPI_ISL_430804	2020_04	29810	0
G	hCoV-19/Argentina/PAIS-G0001/2020	EPI_ISL_499083	2020_04	29802	0
G	hCoV-19/Australia/ACT0031/2020	EPI_ISL_498498	2020_03	29782	2
G	hCoV-19/Australia/NSW102/2020	EPI_ISL_427656	2020_03	29408	0
G	hCoV-19/Australia/NSW103/2020	EPI_ISL_427657	2020_03	29408	0
G	hCoV-19/Australia/NSW104/2020	EPI_ISL_427677	2020_03	29408	0
G	hCoV-19/Australia/NSW105/2020	EPI_ISL_427686	2020_03	29408	0
G	hCoV-19/Australia/NSW106/2020	EPI_ISL_427748	2020_03	29408	0
G	hCoV-19/Australia/NSW107/2020	EPI_ISL_427772	2020_03	29408	0
G	hCoV-19/Australia/NSW108/2020	EPI_ISL_427804	2020_03	29408	0
G	hCoV-19/Australia/NSW109/2020	EPI_ISL_427754	2020_03	29408	0
G	hCoV-19/Australia/NSW110/2020	EPI_ISL_427741	2020_03	29408	33
G	hCoV-19/Australia/NSW111/2020	EPI_ISL_427661	2020_03	29408	0
G	hCoV-19/Australia/NSW112/2020	EPI_ISL_427666	2020_03	29408	0
G	hCoV-19/Australia/NSW113/2020	EPI_ISL_427728	2020_03	29408	0
G	hCoV-19/Australia/NSW114/2020	EPI_ISL_427724	2020_03	29408	0
G	hCoV-19/Australia/NSW115/2020	EPI_ISL_427696	2020_03	29408	13
G	hCoV-19/Australia/NSW116/2020	EPI_ISL_427698	2020_03	29408	0
G	hCoV-19/Australia/NSW117/2020	EPI_ISL_427756	2020_03	29408	0
G	hCoV-19/Australia/NSW118/2020	EPI_ISL_427693	2020_03	29408	0
G	hCoV-19/Australia/NSW119/2020	EPI_ISL_427669	2020_03	29408	0
G	hCoV-19/Australia/NSW120/2020	EPI_ISL_427679	2020_03	29408	0
G	hCoV-19/Australia/NSW121/2020	EPI_ISL_427688	2020_03	29408	0
G	hCoV-19/Australia/NSW122/2020	EPI_ISL_427778	2020_03	29408	0
G	hCoV-19/Australia/NSW123/2020	EPI_ISL_427780	2020_03	29408	0
G	hCoV-19/Australia/NSW124/2020	EPI_ISL_427782	2020_03	29408	0
G	hCoV-19/Australia/NSW125/2020	EPI_ISL_427785	2020_03	29408	0
G	hCoV-19/Australia/NSW126/2020	EPI_ISL_427794	2020_03	29408	0
G	hCoV-19/Australia/NSW127/2020	EPI_ISL_427808	2020_03	29408	0
G	hCoV-19/Australia/NSW128/2020	EPI_ISL_427689	2020_03	29408	0
G	hCoV-19/Australia/NSW129/2020	EPI_ISL_427760	2020_03	29408	0
G	hCoV-19/Australia/NSW130/2020	EPI_ISL_427768	2020_03	29408	0
G	hCoV-19/Australia/NSW131/2020	EPI_ISL_427783	2020_03	29408	0
G	hCoV-19/Australia/NSW132/2020	EPI_ISL_427787	2020_03	29408	0
G	hCoV-19/Australia/NSW133/2020	EPI_ISL_427791	2020_03	29408	0
G	hCoV-19/Australia/NSW134/2020	EPI_ISL_427742	2020_03	29408	63
G	hCoV-19/Australia/NSW135/2020	EPI_ISL_427673	2020_03	29408	0
G	hCoV-19/Australia/NSW136/2020	EPI_ISL_427692	2020_03	29408	0
G	hCoV-19/Australia/NSW137/2020	EPI_ISL_427700	2020_03	29408	0
G	hCoV-19/Australia/NSW138/2020	EPI_ISL_427761	2020_03	29408	0
G	hCoV-19/Australia/NSW139/2020	EPI_ISL_427795	2020_03	29408	0
G	hCoV-19/Australia/NSW140/2020	EPI_ISL_427799	2020_03	29408	0
G	hCoV-19/Australia/NSW141/2020	EPI_ISL_427802	2020_03	29408	0
G	hCoV-19/Australia/NSW142/2020	EPI_ISL_427749	2020_03	29408	0
G	hCoV-19/Australia/NSW143/2020	EPI_ISL_427737	2020_03	29408	0
G	hCoV-19/Australia/NSW144/2020	EPI_ISL_427738	2020_03	29408	0
G	hCoV-19/Australia/NSW145/2020	EPI_ISL_427708	2020_03	29408	0
G	hCoV-19/Australia/NSW146/2020	EPI_ISL_427682	2020_03	29408	0
G	hCoV-19/Australia/NSW147/2020	EPI_ISL_427764	2020_03	29408	0
G	hCoV-19/Australia/NSW148/2020	EPI_ISL_427683	2020_03	29408	3
G	hCoV-19/Australia/NSW149/2020	EPI_ISL_427775	2020_03	29408	0
G	hCoV-19/Australia/NSW150/2020	EPI_ISL_427796	2020_03	29408	0
G	hCoV-19/Australia/NSW151/2020	EPI_ISL_427721	2020_03	29408	0
G	hCoV-19/Australia/NSW152/2020	EPI_ISL_427648	2020_03	29408	0
G	hCoV-19/Australia/NSW153/2020	EPI_ISL_427653	2020_03	29408	0
G	hCoV-19/Australia/NSW154/2020	EPI_ISL_427652	2020_03	29408	0
G	hCoV-19/Australia/NSW155/2020	EPI_ISL_427647	2020_03	29408	0
G	hCoV-19/Australia/NSW156/2020	EPI_ISL_427719	2020_03	29408	7
G	hCoV-19/Australia/NSW157/2020	EPI_ISL_427674	2020_03	29408	0
G	hCoV-19/Australia/NSW158/2020	EPI_ISL_427735	2020_03	29408	0
G	hCoV-19/Australia/NSW159/2020	EPI_ISL_427781	2020_03	29408	0
G	hCoV-19/Australia/NSW160/2020	EPI_ISL_427784	2020_03	29408	0
G	hCoV-19/Australia/NSW161/2020	EPI_ISL_427788	2020_03	29408	0
G	hCoV-19/Australia/NSW162/2020	EPI_ISL_427758	2020_03	29408	0
G	hCoV-19/Australia/NSW163/2020	EPI_ISL_427789	2020_03	29408	0
G	hCoV-19/Australia/NSW164/2020	EPI_ISL_427715	2020_03	29408	0
G	hCoV-19/Australia/NSW165/2020	EPI_ISL_427731	2020_03	29408	0
G	hCoV-19/Australia/NSW166/2020	EPI_ISL_427771	2020_03	29408	0
G	hCoV-19/Australia/NSW167/2020	EPI_ISL_427697	2020_03	29408	0
G	hCoV-19/Australia/NSW168/2020	EPI_ISL_427739	2020_03	29408	0
G	hCoV-19/Australia/NSW170/2020	EPI_ISL_427676	2020_03	29408	0
G	hCoV-19/Australia/NSW171/2020	EPI_ISL_427743	2020_03	29408	0
G	hCoV-19/Australia/NSW2004/2020	EPI_ISL_500596	2020_03	29783	0
G	hCoV-19/Australia/NSW2005/2020	EPI_ISL_500597	2020_03	29783	0
G	hCoV-19/Australia/NSW2014/2020	EPI_ISL_500600	2020_03	29783	1
G	hCoV-19/Australia/NSW2021/2020	EPI_ISL_500604	2020_03	29783	0
G	hCoV-19/Australia/NSW2043/2020	EPI_ISL_500614	2020_03	29783	0
G	hCoV-19/Australia/NSW2047/2020	EPI_ISL_500618	2020_03	29783	0
G	hCoV-19/Australia/NSW2115/2020	EPI_ISL_500621	2020_04	29783	2
G	hCoV-19/Australia/NSW2132/2020	EPI_ISL_500625	2020_04	29783	0
G	hCoV-19/Australia/NSW2147/2020	EPI_ISL_500628	2020_03	29783	2
G	hCoV-19/Australia/NSW2153/2020	EPI_ISL_509505	2020_01	29783	2
G	hCoV-19/Australia/NSW2158/2020	EPI_ISL_500636	2020_03	29783	2
G	hCoV-19/Australia/NSW2159/2020	EPI_ISL_500637	2020_03	29783	2
G	hCoV-19/Australia/NSW2199/2020	EPI_ISL_500660	2020_03	29783	1
G	hCoV-19/Australia/NSW2229/2020	EPI_ISL_500677	2020_03	29783	0
G	hCoV-19/Australia/NSW2235/2020	EPI_ISL_509514	2020_03	29783	0
G	hCoV-19/Australia/NSW224/2020	EPI_ISL_451490	2020_03	29408	0
G	hCoV-19/Australia/NSW225/2020	EPI_ISL_451491	2020_03	29408	0
G	hCoV-19/Australia/NSW2251/2020	EPI_ISL_500690	2020_03	29783	2
G	hCoV-19/Australia/NSW226/2020	EPI_ISL_451492	2020_03	29408	0
G	hCoV-19/Australia/NSW227/2020	EPI_ISL_451493	2020_03	29408	0
G	hCoV-19/Australia/NSW232/2020	EPI_ISL_451498	2020_03	29408	0
G	hCoV-19/Australia/NSW233/2020	EPI_ISL_451499	2020_03	29408	0
G	hCoV-19/Australia/NSW234/2020	EPI_ISL_451500	2020_03	29408	0
G	hCoV-19/Australia/NSW235/2020	EPI_ISL_451501	2020_03	29408	0
G	hCoV-19/Australia/NSW236/2020	EPI_ISL_451502	2020_03	29408	0
G	hCoV-19/Australia/NSW237/2020	EPI_ISL_451503	2020_03	29408	0
G	hCoV-19/Australia/NSW239/2020	EPI_ISL_451505	2020_03	29408	0
G	hCoV-19/Australia/NSW241/2020	EPI_ISL_451507	2020_03	29408	0
G	hCoV-19/Australia/NSW242/2020	EPI_ISL_451508	2020_03	29408	0
G	hCoV-19/Australia/NSW2435/2020	EPI_ISL_527016	2020_03	29783	0
G	hCoV-19/Australia/NSW245/2020	EPI_ISL_451510	2020_03	29408	0
G	hCoV-19/Australia/NSW247/2020	EPI_ISL_451512	2020_03	29408	0
G	hCoV-19/Australia/NSW249/2020	EPI_ISL_451514	2020_03	29408	0
G	hCoV-19/Australia/NSW253/2020	EPI_ISL_451518	2020_03	29408	0
G	hCoV-19/Australia/NSW2534/2020	EPI_ISL_527038	2020_04	29783	0
G	hCoV-19/Australia/NSW2536/2020	EPI_ISL_527039	2020_04	29783	0
G	hCoV-19/Australia/NSW2538/2020	EPI_ISL_527040	2020_04	29783	0
G	hCoV-19/Australia/NSW2547/2020	EPI_ISL_527048	2020_04	29783	0
G	hCoV-19/Australia/NSW2548/2020	EPI_ISL_527049	2020_04	29783	0
G	hCoV-19/Australia/NSW2549/2020	EPI_ISL_527050	2020_04	29783	0
G	hCoV-19/Australia/NSW2550/2020	EPI_ISL_527051	2020_04	29783	0
G	hCoV-19/Australia/NSW2551/2020	EPI_ISL_527052	2020_04	29783	0
G	hCoV-19/Australia/NSW2571/2020	EPI_ISL_527058	2020_04	29783	0
G	hCoV-19/Australia/NSW2577/2020	EPI_ISL_527062	2020_04	29783	0
G	hCoV-19/Australia/NSW258/2020	EPI_ISL_451523	2020_03	29408	0
G	hCoV-19/Australia/NSW259/2020	EPI_ISL_451524	2020_03	29408	0
G	hCoV-19/Australia/NSW261/2020	EPI_ISL_451526	2020_03	29408	0
G	hCoV-19/Australia/NSW262/2020	EPI_ISL_451527	2020_03	29408	0
G	hCoV-19/Australia/NSW263/2020	EPI_ISL_451528	2020_03	29408	0
G	hCoV-19/Australia/NSW268/2020	EPI_ISL_451533	2020_03	29399	0
G	hCoV-19/Australia/NSW269/2020	EPI_ISL_451534	2020_04	29408	0
G	hCoV-19/Australia/NSW273/2020	EPI_ISL_451538	2020_03	29408	0
G	hCoV-19/Australia/NSW276/2020	EPI_ISL_451540	2020_03	29408	0
G	hCoV-19/Australia/NSW277/2020	EPI_ISL_451541	2020_04	29408	0
G	hCoV-19/Australia/NSW278/2020	EPI_ISL_451542	2020_03	29408	0
G	hCoV-19/Australia/NSW279/2020	EPI_ISL_451543	2020_03	29408	0
G	hCoV-19/Australia/NSW280/2020	EPI_ISL_451544	2020_03	29408	0
G	hCoV-19/Australia/NSW281/2020	EPI_ISL_451545	2020_03	29408	0
G	hCoV-19/Australia/NSW282/2020	EPI_ISL_451546	2020_04	29408	0
G	hCoV-19/Australia/NSW283/2020	EPI_ISL_451547	2020_04	29408	0
G	hCoV-19/Australia/NSW284/2020	EPI_ISL_451548	2020_04	29408	0
G	hCoV-19/Australia/NSW286/2020	EPI_ISL_451550	2020_04	29408	0
G	hCoV-19/Australia/NSW287/2020	EPI_ISL_451551	2020_04	29408	0
G	hCoV-19/Australia/NSW289/2020	EPI_ISL_451553	2020_03	29408	0
G	hCoV-19/Australia/NSW290/2020	EPI_ISL_451554	2020_04	29408	0
G	hCoV-19/Australia/NSW291/2020	EPI_ISL_451555	2020_04	29408	0
G	hCoV-19/Australia/NSW292/2020	EPI_ISL_451556	2020_03	29408	0
G	hCoV-19/Australia/NSW294/2020	EPI_ISL_451558	2020_04	29408	0
G	hCoV-19/Australia/NSW296/2020	EPI_ISL_451560	2020_04	29408	0
G	hCoV-19/Australia/NSW298/2020	EPI_ISL_451562	2020_04	29408	0
G	hCoV-19/Australia/NSW299/2020	EPI_ISL_451563	2020_03	29408	0
G	hCoV-19/Australia/NSW302/2020	EPI_ISL_451566	2020_04	29408	0
G	hCoV-19/Australia/NSW303/2020	EPI_ISL_451567	2020_03	29408	0
G	hCoV-19/Australia/NSW304/2020	EPI_ISL_451568	2020_04	29408	0
G	hCoV-19/Australia/NSW305/2020	EPI_ISL_451569	2020_03	29408	0
G	hCoV-19/Australia/NSW306/2020	EPI_ISL_451570	2020_04	29408	0
G	hCoV-19/Australia/NSW308/2020	EPI_ISL_451572	2020_03	29408	0
G	hCoV-19/Australia/NSW309/2020	EPI_ISL_451573	2020_04	29408	0
G	hCoV-19/Australia/NSW311/2020	EPI_ISL_451575	2020_03	29408	0
G	hCoV-19/Australia/NSW314/2020	EPI_ISL_451577	2020_03	29408	0
G	hCoV-19/Australia/NSW316/2020	EPI_ISL_451579	2020_03	29408	0
G	hCoV-19/Australia/NSW318/2020	EPI_ISL_451581	2020_04	29408	0
G	hCoV-19/Australia/NSW319/2020	EPI_ISL_451582	2020_04	29408	0
G	hCoV-19/Australia/NSW321/2020	EPI_ISL_451583	2020_04	29408	0
G	hCoV-19/Australia/NSW322/2020	EPI_ISL_451584	2020_03	29408	0
G	hCoV-19/Australia/NSW324/2020	EPI_ISL_451586	2020_03	29408	0
G	hCoV-19/Australia/NSW325/2020	EPI_ISL_451587	2020_04	29408	0
G	hCoV-19/Australia/NSW326/2020	EPI_ISL_451588	2020_03	29408	0
G	hCoV-19/Australia/NSW327/2020	EPI_ISL_451589	2020_04	29408	0
G	hCoV-19/Australia/NSW329/2020	EPI_ISL_451591	2020_03	29408	0
G	hCoV-19/Australia/NSW332/2020	EPI_ISL_451594	2020_04	29408	0
G	hCoV-19/Australia/NSW336/2020	EPI_ISL_451598	2020_03	29408	0
G	hCoV-19/Australia/NSW338/2020	EPI_ISL_451600	2020_04	29408	0
G	hCoV-19/Australia/NSW339/2020	EPI_ISL_451601	2020_03	29408	0
G	hCoV-19/Australia/NSW340/2020	EPI_ISL_451602	2020_03	29408	0
G	hCoV-19/Australia/NSW341/2020	EPI_ISL_451603	2020_04	29408	0
G	hCoV-19/Australia/NSW342/2020	EPI_ISL_451604	2020_03	29408	0
G	hCoV-19/Australia/NSW344/2020	EPI_ISL_451605	2020_04	29408	0
G	hCoV-19/Australia/NSW345/2020	EPI_ISL_451606	2020_04	29408	0
G	hCoV-19/Australia/NSW346/2020	EPI_ISL_451607	2020_03	29408	0
G	hCoV-19/Australia/NSW348/2020	EPI_ISL_451609	2020_03	29408	0
G	hCoV-19/Australia/NSW349/2020	EPI_ISL_451610	2020_04	29399	0
G	hCoV-19/Australia/NSW351/2020	EPI_ISL_451612	2020_03	29408	0
G	hCoV-19/Australia/NSW352/2020	EPI_ISL_451613	2020_04	29408	0
G	hCoV-19/Australia/NSW353/2020	EPI_ISL_451614	2020_04	29408	0
G	hCoV-19/Australia/NSW354/2020	EPI_ISL_451615	2020_04	29408	0
G	hCoV-19/Australia/NSW355/2020	EPI_ISL_451616	2020_04	29408	0
G	hCoV-19/Australia/NSW356/2020	EPI_ISL_451617	2020_04	29408	0
G	hCoV-19/Australia/NSW357/2020	EPI_ISL_451618	2020_04	29408	0
G	hCoV-19/Australia/NSW358/2020	EPI_ISL_451619	2020_04	29408	0
G	hCoV-19/Australia/NSW359/2020	EPI_ISL_451620	2020_04	29408	0
G	hCoV-19/Australia/NSW360/2020	EPI_ISL_451621	2020_04	29408	0
G	hCoV-19/Australia/NSW361/2020	EPI_ISL_451622	2020_04	29408	0
G	hCoV-19/Australia/NSW362/2020	EPI_ISL_451623	2020_04	29408	0
G	hCoV-19/Australia/NSW363/2020	EPI_ISL_451624	2020_04	29408	0
G	hCoV-19/Australia/NSW364/2020	EPI_ISL_451625	2020_04	29408	0
G	hCoV-19/Australia/NSW365/2020	EPI_ISL_451626	2020_04	29408	0
G	hCoV-19/Australia/NSW366/2020	EPI_ISL_451627	2020_04	29408	0
G	hCoV-19/Australia/NSW367/2020	EPI_ISL_451628	2020_04	29408	0
G	hCoV-19/Australia/NSW368/2020	EPI_ISL_451629	2020_04	29408	0
G	hCoV-19/Australia/NSW369/2020	EPI_ISL_451630	2020_04	29408	0
G	hCoV-19/Australia/NSW371/2020	EPI_ISL_451632	2020_03	29408	0
G	hCoV-19/Australia/NSW373/2020	EPI_ISL_451633	2020_03	29408	0
G	hCoV-19/Australia/NSW377/2020	EPI_ISL_451637	2020_04	29408	0
G	hCoV-19/Australia/NSW378/2020	EPI_ISL_451638	2020_04	29408	0
G	hCoV-19/Australia/NSW379/2020	EPI_ISL_451639	2020_04	29408	0
G	hCoV-19/Australia/NSW380/2020	EPI_ISL_451640	2020_04	29408	0
G	hCoV-19/Australia/NSW381/2020	EPI_ISL_451641	2020_04	29408	0
G	hCoV-19/Australia/NSW382/2020	EPI_ISL_451642	2020_04	29408	0
G	hCoV-19/Australia/NSW383/2020	EPI_ISL_451643	2020_04	29408	0
G	hCoV-19/Australia/NSW39/2020	EPI_ISL_417397	2020_03	29409	0
G	hCoV-19/Australia/NSW47/2020	EPI_ISL_417402	2020_03	29409	0
G	hCoV-19/Australia/NSW488/2020	EPI_ISL_455028	2020_04	29408	0
G	hCoV-19/Australia/NSW489/2020	EPI_ISL_455029	2020_04	29408	0
G	hCoV-19/Australia/NSW490/2020	EPI_ISL_455030	2020_04	29408	0
G	hCoV-19/Australia/NSW491/2020	EPI_ISL_455031	2020_04	29408	0
G	hCoV-19/Australia/NSW492/2020	EPI_ISL_455032	2020_04	29408	0
G	hCoV-19/Australia/NSW493/2020	EPI_ISL_455033	2020_04	29408	0
G	hCoV-19/Australia/NSW494/2020	EPI_ISL_455034	2020_04	29408	0
G	hCoV-19/Australia/NSW495/2020	EPI_ISL_455035	2020_04	29408	0
G	hCoV-19/Australia/NSW496/2020	EPI_ISL_455036	2020_03	29408	0
G	hCoV-19/Australia/NSW497/2020	EPI_ISL_455037	2020_04	29408	0
G	hCoV-19/Australia/NSW498/2020	EPI_ISL_455038	2020_04	29408	0
G	hCoV-19/Australia/NSW499/2020	EPI_ISL_455039	2020_04	29408	0
G	hCoV-19/Australia/NSW50/2020	EPI_ISL_417404	2020_03	29409	0
G	hCoV-19/Australia/NSW500/2020	EPI_ISL_455040	2020_04	29408	0
G	hCoV-19/Australia/NSW506/2020	EPI_ISL_455046	2020_03	29408	0
G	hCoV-19/Australia/NSW507/2020	EPI_ISL_455047	2020_04	29408	0
G	hCoV-19/Australia/NSW509/2020	EPI_ISL_455049	2020_04	29408	0
G	hCoV-19/Australia/NSW511/2020	EPI_ISL_455051	2020_03	29408	0
G	hCoV-19/Australia/NSW512/2020	EPI_ISL_455052	2020_03	29408	0
G	hCoV-19/Australia/NSW513/2020	EPI_ISL_455053	2020_03	29408	0
G	hCoV-19/Australia/NSW515/2020	EPI_ISL_455055	2020_04	29408	0
G	hCoV-19/Australia/NSW516/2020	EPI_ISL_455056	2020_04	29408	0
G	hCoV-19/Australia/NSW517/2020	EPI_ISL_455057	2020_05	29408	0
G	hCoV-19/Australia/NSW518/2020	EPI_ISL_455058	2020_05	29408	0
G	hCoV-19/Australia/NSW519/2020	EPI_ISL_455059	2020_04	29408	0
G	hCoV-19/Australia/NSW520/2020	EPI_ISL_455060	2020_05	29408	0
G	hCoV-19/Australia/NSW521/2020	EPI_ISL_455061	2020_05	29408	0
G	hCoV-19/Australia/NSW523/2020	EPI_ISL_455063	2020_03	29408	0
G	hCoV-19/Australia/NSW524/2020	EPI_ISL_455064	2020_03	29408	0
G	hCoV-19/Australia/NSW525/2020	EPI_ISL_455065	2020_03	29408	0
G	hCoV-19/Australia/NSW527/2020	EPI_ISL_455066	2020_05	29408	0
G	hCoV-19/Australia/NSW528/2020	EPI_ISL_455067	2020_03	29408	0
G	hCoV-19/Australia/NSW529/2020	EPI_ISL_455068	2020_05	29408	0
G	hCoV-19/Australia/NSW530/2020	EPI_ISL_455069	2020_05	29408	0
G	hCoV-19/Australia/NSW531/2020	EPI_ISL_455070	2020_05	29408	0
G	hCoV-19/Australia/NSW532/2020	EPI_ISL_455071	2020_05	29408	0
G	hCoV-19/Australia/NSW533/2020	EPI_ISL_455072	2020_05	29408	0
G	hCoV-19/Australia/NSW534/2020	EPI_ISL_455073	2020_05	29408	0
G	hCoV-19/Australia/NSW535/2020	EPI_ISL_455074	2020_05	29408	0
G	hCoV-19/Australia/NSW536/2020	EPI_ISL_455075	2020_03	29408	0
G	hCoV-19/Australia/NSW538/2020	EPI_ISL_455077	2020_03	29408	0
G	hCoV-19/Australia/NSW54/2020	EPI_ISL_417407	2020_03	29409	0
G	hCoV-19/Australia/NSW542/2020	EPI_ISL_455081	2020_03	29408	0
G	hCoV-19/Australia/NSW544/2020	EPI_ISL_455083	2020_04	29408	0
G	hCoV-19/Australia/NSW545/2020	EPI_ISL_455084	2020_04	29408	0
G	hCoV-19/Australia/NSW546/2020	EPI_ISL_455085	2020_04	29408	0
G	hCoV-19/Australia/NSW548/2020	EPI_ISL_455087	2020_03	29408	0
G	hCoV-19/Australia/NSW551/2020	EPI_ISL_455090	2020_05	29408	0
G	hCoV-19/Australia/NSW552/2020	EPI_ISL_455091	2020_05	29408	0
G	hCoV-19/Australia/NSW553/2020	EPI_ISL_455092	2020_05	29408	0
G	hCoV-19/Australia/NSW554/2020	EPI_ISL_455093	2020_05	29408	0
G	hCoV-19/Australia/NSW555/2020	EPI_ISL_455094	2020_03	29408	0
G	hCoV-19/Australia/NSW556/2020	EPI_ISL_455095	2020_04	29408	0
G	hCoV-19/Australia/NSW558/2020	EPI_ISL_455097	2020_04	29408	0
G	hCoV-19/Australia/NSW561/2020	EPI_ISL_478673	2020_03	29408	0
G	hCoV-19/Australia/NSW562/2020	EPI_ISL_478674	2020_03	29408	0
G	hCoV-19/Australia/NSW563/2020	EPI_ISL_478675	2020_03	29408	0
G	hCoV-19/Australia/NSW581/2020	EPI_ISL_478693	2020_03	29408	2
G	hCoV-19/Australia/NSW588/2020	EPI_ISL_478700	2020_03	29408	0
G	hCoV-19/Australia/NSW589/2020	EPI_ISL_478701	2020_04	29408	0
G	hCoV-19/Australia/NSW591/2020	EPI_ISL_478703	2020_03	29408	0
G	hCoV-19/Australia/NSW592/2020	EPI_ISL_478704	2020_03	29408	0
G	hCoV-19/Australia/NSW593/2020	EPI_ISL_478705	2020_04	29408	0
G	hCoV-19/Australia/NSW594/2020	EPI_ISL_478706	2020_03	29408	0
G	hCoV-19/Australia/NSW595/2020	EPI_ISL_478707	2020_04	29408	0
G	hCoV-19/Australia/NSW598/2020	EPI_ISL_478710	2020_06	29408	0
G	hCoV-19/Australia/NSW599/2020	EPI_ISL_478711	2020_06	29408	0
G	hCoV-19/Australia/NSW600/2020	EPI_ISL_478712	2020_04	29408	0
G	hCoV-19/Australia/NSW601/2020	EPI_ISL_478713	2020_04	29408	0
G	hCoV-19/Australia/NSW602/2020	EPI_ISL_478714	2020_04	29408	0
G	hCoV-19/Australia/NSW603/2020	EPI_ISL_478715	2020_04	29408	0
G	hCoV-19/Australia/NSW604/2020	EPI_ISL_478716	2020_04	29408	0
G	hCoV-19/Australia/NSW605/2020	EPI_ISL_478717	2020_06	29408	0
G	hCoV-19/Australia/NSW606/2020	EPI_ISL_478718	2020_06	29408	0
G	hCoV-19/Australia/NSW61/2020	EPI_ISL_417411	2020_03	29409	0
G	hCoV-19/Australia/NSW610/2020	EPI_ISL_490019	2020_04	29408	0
G	hCoV-19/Australia/NSW612/2020	EPI_ISL_490021	2020_06	29408	0
G	hCoV-19/Australia/NSW613/2020	EPI_ISL_490022	2020_06	29408	0
G	hCoV-19/Australia/NSW614/2020	EPI_ISL_490023	2020_06	29402	0
G	hCoV-19/Australia/NSW615/2020	EPI_ISL_490024	2020_05	29408	0
G	hCoV-19/Australia/NSW616/2020	EPI_ISL_490025	2020_06	29408	0
G	hCoV-19/Australia/NSW617/2020	EPI_ISL_490026	2020_06	29408	0
G	hCoV-19/Australia/NSW618/2020	EPI_ISL_490027	2020_06	29408	0
G	hCoV-19/Australia/NSW619/2020	EPI_ISL_490028	2020_06	29408	0
G	hCoV-19/Australia/NSW620/2020	EPI_ISL_490029	2020_06	29408	0
G	hCoV-19/Australia/NSW621/2020	EPI_ISL_490030	2020_05	29408	0
G	hCoV-19/Australia/NSW624/2020	EPI_ISL_490033	2020_04	29408	0
G	hCoV-19/Australia/NSW627/2020	EPI_ISL_490036	2020_06	29408	0
G	hCoV-19/Australia/NSW628/2020	EPI_ISL_490037	2020_03	29408	0
G	hCoV-19/Australia/NSW629/2020	EPI_ISL_490038	2020_07	29408	0
G	hCoV-19/Australia/NSW630/2020	EPI_ISL_490039	2020_07	29408	0
G	hCoV-19/Australia/NSW631/2020	EPI_ISL_490040	2020_06	29408	0
G	hCoV-19/Australia/NSW632/2020	EPI_ISL_490041	2020_06	29408	0
G	hCoV-19/Australia/NSW633/2020	EPI_ISL_490042	2020_07	29408	0
G	hCoV-19/Australia/NSW634/2020	EPI_ISL_490043	2020_07	29408	0
G	hCoV-19/Australia/NSW635/2020	EPI_ISL_490044	2020_07	29408	0
G	hCoV-19/Australia/NSW637/2020	EPI_ISL_490046	2020_07	29408	0
G	hCoV-19/Australia/NSW640/2020	EPI_ISL_498750	2020_03	29408	0
G	hCoV-19/Australia/NSW642/2020	EPI_ISL_498761	2020_07	29408	0
G	hCoV-19/Australia/NSW643/2020	EPI_ISL_498762	2020_07	29408	0
G	hCoV-19/Australia/NSW644/2020	EPI_ISL_498763	2020_07	29408	0
G	hCoV-19/Australia/NSW645/2020	EPI_ISL_498764	2020_07	29408	0
G	hCoV-19/Australia/NSW646/2020	EPI_ISL_498765	2020_07	29408	0
G	hCoV-19/Australia/NSW647/2020	EPI_ISL_498766	2020_07	29408	0
G	hCoV-19/Australia/NSW648/2020	EPI_ISL_498767	2020_07	29408	0
G	hCoV-19/Australia/NSW649/2020	EPI_ISL_498768	2020_07	29408	0
G	hCoV-19/Australia/NSW650/2020	EPI_ISL_498769	2020_07	29408	0
G	hCoV-19/Australia/NSW651/2020	EPI_ISL_498770	2020_07	29408	0
G	hCoV-19/Australia/NSW652/2020	EPI_ISL_498771	2020_07	29408	0
G	hCoV-19/Australia/NSW653/2020	EPI_ISL_498772	2020_07	29408	0
G	hCoV-19/Australia/NSW654/2020	EPI_ISL_498773	2020_07	29408	0
G	hCoV-19/Australia/NSW655/2020	EPI_ISL_498774	2020_07	29408	0
G	hCoV-19/Australia/NSW656/2020	EPI_ISL_498775	2020_07	29408	0
G	hCoV-19/Australia/NSW657/2020	EPI_ISL_498776	2020_07	29408	0
G	hCoV-19/Australia/NSW658/2020	EPI_ISL_498777	2020_07	29408	0
G	hCoV-19/Australia/NSW659/2020	EPI_ISL_498778	2020_07	29408	0
G	hCoV-19/Australia/NSW660/2020	EPI_ISL_498779	2020_07	29408	0
G	hCoV-19/Australia/NSW661/2020	EPI_ISL_498780	2020_07	29408	0
G	hCoV-19/Australia/NSW662/2020	EPI_ISL_498781	2020_07	29408	0
G	hCoV-19/Australia/NSW663/2020	EPI_ISL_498782	2020_07	29408	0
G	hCoV-19/Australia/NSW672/2020	EPI_ISL_513315	2020_04	29408	0
G	hCoV-19/Australia/NSW673/2020	EPI_ISL_513316	2020_04	29408	0
G	hCoV-19/Australia/NSW675/2020	EPI_ISL_513318	2020_07	29408	0
G	hCoV-19/Australia/NSW676/2020	EPI_ISL_513319	2020_07	29408	0
G	hCoV-19/Australia/NSW677/2020	EPI_ISL_513320	2020_07	29408	0
G	hCoV-19/Australia/NSW678/2020	EPI_ISL_513321	2020_07	29408	0
G	hCoV-19/Australia/NSW679/2020	EPI_ISL_513322	2020_07	29408	0
G	hCoV-19/Australia/NSW680/2020	EPI_ISL_513323	2020_07	29408	0
G	hCoV-19/Australia/NSW681/2020	EPI_ISL_513324	2020_07	29408	0
G	hCoV-19/Australia/NSW682/2020	EPI_ISL_513325	2020_07	29408	0
G	hCoV-19/Australia/NSW683/2020	EPI_ISL_513326	2020_07	29408	0
G	hCoV-19/Australia/NSW684/2020	EPI_ISL_513327	2020_07	29408	0
G	hCoV-19/Australia/NSW685/2020	EPI_ISL_513328	2020_07	29408	0
G	hCoV-19/Australia/NSW686/2020	EPI_ISL_513329	2020_07	29408	0
G	hCoV-19/Australia/NSW687/2020	EPI_ISL_513330	2020_07	29408	0
G	hCoV-19/Australia/NSW688/2020	EPI_ISL_513331	2020_07	29408	0
G	hCoV-19/Australia/NSW689/2020	EPI_ISL_513332	2020_07	29408	0
G	hCoV-19/Australia/NSW690/2020	EPI_ISL_513333	2020_07	29408	0
G	hCoV-19/Australia/NSW691/2020	EPI_ISL_513334	2020_07	29408	0
G	hCoV-19/Australia/NSW692/2020	EPI_ISL_513335	2020_07	29408	0
G	hCoV-19/Australia/NSW693/2020	EPI_ISL_513336	2020_07	29408	0
G	hCoV-19/Australia/NSW694/2020	EPI_ISL_513337	2020_07	29408	0
G	hCoV-19/Australia/NSW695/2020	EPI_ISL_513338	2020_07	29408	0
G	hCoV-19/Australia/NSW696/2020	EPI_ISL_513339	2020_07	29408	0
G	hCoV-19/Australia/NSW697/2020	EPI_ISL_513340	2020_07	29408	0
G	hCoV-19/Australia/NSW698/2020	EPI_ISL_513341	2020_07	29408	0
G	hCoV-19/Australia/NSW699/2020	EPI_ISL_513342	2020_07	29408	0
G	hCoV-19/Australia/NSW700/2020	EPI_ISL_513343	2020_07	29408	0
G	hCoV-19/Australia/NSW701/2020	EPI_ISL_513344	2020_07	29408	0
G	hCoV-19/Australia/NSW702/2020	EPI_ISL_513345	2020_07	29408	0
G	hCoV-19/Australia/NSW703/2020	EPI_ISL_513346	2020_07	29408	0
G	hCoV-19/Australia/NSW704/2020	EPI_ISL_513347	2020_07	29408	0
G	hCoV-19/Australia/NSW705/2020	EPI_ISL_513348	2020_07	29408	0
G	hCoV-19/Australia/NSW706/2020	EPI_ISL_513349	2020_07	29408	0
G	hCoV-19/Australia/NSW707/2020	EPI_ISL_513350	2020_07	29408	0
G	hCoV-19/Australia/NSW708/2020	EPI_ISL_513351	2020_07	29408	0
G	hCoV-19/Australia/NSW709/2020	EPI_ISL_513352	2020_07	29408	0
G	hCoV-19/Australia/NSW710/2020	EPI_ISL_513353	2020_07	29408	0
G	hCoV-19/Australia/NSW711/2020	EPI_ISL_513354	2020_07	29408	0
G	hCoV-19/Australia/NSW712/2020	EPI_ISL_513355	2020_07	29408	0
G	hCoV-19/Australia/NSW713/2020	EPI_ISL_513356	2020_07	29408	0
G	hCoV-19/Australia/NSW714/2020	EPI_ISL_513357	2020_07	29408	0
G	hCoV-19/Australia/NSW715/2020	EPI_ISL_513358	2020_07	29408	0
G	hCoV-19/Australia/NSW716/2020	EPI_ISL_513359	2020_07	29408	0
G	hCoV-19/Australia/NSW717/2020	EPI_ISL_513360	2020_07	29408	0
G	hCoV-19/Australia/NSW718/2020	EPI_ISL_513361	2020_07	29408	0
G	hCoV-19/Australia/NSW719/2020	EPI_ISL_513362	2020_07	29408	0
G	hCoV-19/Australia/NSW720/2020	EPI_ISL_513363	2020_07	29408	0
G	hCoV-19/Australia/NSW721/2020	EPI_ISL_513364	2020_07	29408	0
G	hCoV-19/Australia/NSW722/2020	EPI_ISL_513365	2020_07	29408	0
G	hCoV-19/Australia/NSW723/2020	EPI_ISL_513366	2020_07	29408	0
G	hCoV-19/Australia/NSW724/2020	EPI_ISL_513367	2020_07	29408	0
G	hCoV-19/Australia/NSW725/2020	EPI_ISL_513368	2020_07	29408	0
G	hCoV-19/Australia/NSW726/2020	EPI_ISL_513369	2020_07	29408	0
G	hCoV-19/Australia/NSW727/2020	EPI_ISL_513370	2020_07	29408	0
G	hCoV-19/Australia/NSW728/2020	EPI_ISL_513371	2020_07	29408	0
G	hCoV-19/Australia/NSW729/2020	EPI_ISL_513372	2020_07	29408	0
G	hCoV-19/Australia/NSW730/2020	EPI_ISL_513373	2020_07	29408	0
G	hCoV-19/Australia/NSW731/2020	EPI_ISL_513374	2020_07	29408	0
G	hCoV-19/Australia/NSW732/2020	EPI_ISL_513375	2020_07	29408	0
G	hCoV-19/Australia/NSW733/2020	EPI_ISL_513376	2020_07	29408	0
G	hCoV-19/Australia/NSW734/2020	EPI_ISL_513377	2020_07	29408	0
G	hCoV-19/Australia/NSW735/2020	EPI_ISL_513378	2020_07	29408	0
G	hCoV-19/Australia/NSW736/2020	EPI_ISL_513379	2020_07	29408	0
G	hCoV-19/Australia/NSW737/2020	EPI_ISL_513380	2020_07	29408	0
G	hCoV-19/Australia/NSW738/2020	EPI_ISL_513381	2020_07	29408	0
G	hCoV-19/Australia/NSW739/2020	EPI_ISL_513382	2020_07	29408	0
G	hCoV-19/Australia/NSW740/2020	EPI_ISL_513383	2020_07	29408	0
G	hCoV-19/Australia/NSW741/2020	EPI_ISL_513384	2020_07	29408	0
G	hCoV-19/Australia/NSW742/2020	EPI_ISL_513385	2020_07	29408	0
G	hCoV-19/Australia/NSW743/2020	EPI_ISL_513386	2020_07	29408	0
G	hCoV-19/Australia/NSW744/2020	EPI_ISL_513387	2020_07	29408	0
G	hCoV-19/Australia/NSW745/2020	EPI_ISL_513388	2020_07	29408	0
G	hCoV-19/Australia/NSW747/2020	EPI_ISL_513389	2020_07	29408	0
G	hCoV-19/Australia/NSW748/2020	EPI_ISL_513390	2020_07	29408	0
G	hCoV-19/Australia/NSW749/2020	EPI_ISL_513391	2020_07	29408	0
G	hCoV-19/Australia/NSW750/2020	EPI_ISL_513392	2020_07	29408	0
G	hCoV-19/Australia/NSW751/2020	EPI_ISL_513393	2020_08	29408	0
G	hCoV-19/Australia/NSW752/2020	EPI_ISL_513394	2020_07	29408	0
G	hCoV-19/Australia/NSW753/2020	EPI_ISL_513395	2020_07	29408	0
G	hCoV-19/Australia/NSW754/2020	EPI_ISL_513396	2020_07	29408	0
G	hCoV-19/Australia/NSW755/2020	EPI_ISL_513397	2020_07	29408	0
G	hCoV-19/Australia/NSW756/2020	EPI_ISL_513398	2020_07	29408	0
G	hCoV-19/Australia/NSW757/2020	EPI_ISL_513399	2020_07	29408	0
G	hCoV-19/Australia/NSW758/2020	EPI_ISL_513400	2020_07	29408	0
G	hCoV-19/Australia/NSW759/2020	EPI_ISL_513401	2020_07	29408	0
G	hCoV-19/Australia/NSW760/2020	EPI_ISL_513402	2020_08	29408	0
G	hCoV-19/Australia/NSW761/2020	EPI_ISL_513403	2020_07	29408	0
G	hCoV-19/Australia/NSW762/2020	EPI_ISL_513404	2020_07	29408	0
G	hCoV-19/Australia/NSW763/2020	EPI_ISL_513405	2020_07	29408	0
G	hCoV-19/Australia/NSW764/2020	EPI_ISL_513406	2020_07	29408	0
G	hCoV-19/Australia/NSW765/2020	EPI_ISL_513407	2020_07	29408	0
G	hCoV-19/Australia/NSW766/2020	EPI_ISL_513408	2020_07	29408	0
G	hCoV-19/Australia/NSW767/2020	EPI_ISL_513409	2020_07	29408	0
G	hCoV-19/Australia/NSW768/2020	EPI_ISL_513410	2020_07	29408	0
G	hCoV-19/Australia/NSW769/2020	EPI_ISL_513411	2020_08	29408	0
G	hCoV-19/Australia/NSW770/2020	EPI_ISL_513412	2020_08	29408	0
G	hCoV-19/Australia/NSW771/2020	EPI_ISL_513413	2020_07	29408	0
G	hCoV-19/Australia/NSW772/2020	EPI_ISL_526689	2020_07	29408	0
G	hCoV-19/Australia/NSW773/2020	EPI_ISL_526115	2020_07	29408	0
G	hCoV-19/Australia/NSW774/2020	EPI_ISL_526116	2020_07	29408	0
G	hCoV-19/Australia/NSW775/2020	EPI_ISL_526117	2020_07	29408	0
G	hCoV-19/Australia/NSW776/2020	EPI_ISL_526118	2020_07	29408	0
G	hCoV-19/Australia/NSW777/2020	EPI_ISL_526119	2020_07	29408	0
G	hCoV-19/Australia/NSW778/2020	EPI_ISL_526120	2020_07	29408	0
G	hCoV-19/Australia/NSW779/2020	EPI_ISL_526121	2020_08	29408	0
G	hCoV-19/Australia/NSW780/2020	EPI_ISL_526122	2020_08	29408	0
G	hCoV-19/Australia/NSW781/2020	EPI_ISL_526123	2020_07	29408	0
G	hCoV-19/Australia/NSW782/2020	EPI_ISL_526124	2020_07	29408	0
G	hCoV-19/Australia/NSW783/2020	EPI_ISL_526125	2020_08	29408	0
G	hCoV-19/Australia/NSW784/2020	EPI_ISL_526126	2020_07	29408	0
G	hCoV-19/Australia/NSW785/2020	EPI_ISL_526127	2020_07	29408	0
G	hCoV-19/Australia/NSW787/2020	EPI_ISL_526129	2020_07	29408	0
G	hCoV-19/Australia/NSW789/2020	EPI_ISL_526131	2020_08	29408	0
G	hCoV-19/Australia/NSW790/2020	EPI_ISL_526132	2020_08	29408	0
G	hCoV-19/Australia/NSW791/2020	EPI_ISL_526133	2020_08	29408	0
G	hCoV-19/Australia/NSW792/2020	EPI_ISL_526134	2020_07	29408	0
G	hCoV-19/Australia/NSW793/2020	EPI_ISL_526135	2020_07	29408	0
G	hCoV-19/Australia/NSW794/2020	EPI_ISL_526136	2020_07	29408	0
G	hCoV-19/Australia/NSW795/2020	EPI_ISL_526137	2020_07	29408	0
G	hCoV-19/Australia/NSW796/2020	EPI_ISL_526138	2020_08	29408	0
G	hCoV-19/Australia/NSW797/2020	EPI_ISL_526139	2020_08	29408	0
G	hCoV-19/Australia/NSW798/2020	EPI_ISL_526140	2020_08	29408	0
G	hCoV-19/Australia/NSW799/2020	EPI_ISL_526141	2020_08	29408	0
G	hCoV-19/Australia/NSW800/2020	EPI_ISL_526142	2020_07	29408	0
G	hCoV-19/Australia/NSW801/2020	EPI_ISL_526143	2020_07	29408	0
G	hCoV-19/Australia/NSW807/2020	EPI_ISL_526149	2020_08	29408	0
G	hCoV-19/Australia/NSW808/2020	EPI_ISL_526150	2020_08	29408	0
G	hCoV-19/Australia/NSW809/2020	EPI_ISL_526151	2020_08	29408	0
G	hCoV-19/Australia/NSW810/2020	EPI_ISL_526152	2020_08	29408	0
G	hCoV-19/Australia/NSW811/2020	EPI_ISL_526153	2020_08	29408	0
G	hCoV-19/Australia/NSW812/2020	EPI_ISL_526154	2020_08	29408	0
G	hCoV-19/Australia/NSW813/2020	EPI_ISL_526155	2020_08	29408	0
G	hCoV-19/Australia/NSW814/2020	EPI_ISL_526156	2020_08	29408	0
G	hCoV-19/Australia/NSW815/2020	EPI_ISL_526157	2020_08	29408	0
G	hCoV-19/Australia/NSW816/2020	EPI_ISL_526158	2020_08	29408	0
G	hCoV-19/Australia/NSW817/2020	EPI_ISL_526159	2020_08	29408	0
G	hCoV-19/Australia/NSW818/2020	EPI_ISL_526160	2020_08	29408	0
G	hCoV-19/Australia/NSW819/2020	EPI_ISL_526161	2020_08	29408	0
G	hCoV-19/Australia/NSW820/2020	EPI_ISL_526162	2020_08	29408	0
G	hCoV-19/Australia/NSW821/2020	EPI_ISL_526163	2020_08	29408	0
G	hCoV-19/Australia/NSW822/2020	EPI_ISL_526164	2020_08	29408	0
G	hCoV-19/Australia/NSW823/2020	EPI_ISL_526165	2020_08	29408	0
G	hCoV-19/Australia/NSW824/2020	EPI_ISL_526166	2020_08	29408	0
G	hCoV-19/Australia/NSW825/2020	EPI_ISL_526167	2020_08	29408	0
G	hCoV-19/Australia/NSW826/2020	EPI_ISL_526168	2020_08	29408	0
G	hCoV-19/Australia/NSW827/2020	EPI_ISL_526169	2020_08	29408	0
G	hCoV-19/Australia/NSW828/2020	EPI_ISL_526170	2020_08	29408	0
G	hCoV-19/Australia/NSW829/2020	EPI_ISL_526171	2020_08	29408	0
G	hCoV-19/Australia/NSW830/2020	EPI_ISL_526172	2020_08	29408	0
G	hCoV-19/Australia/NSW831/2020	EPI_ISL_526173	2020_08	29408	0
G	hCoV-19/Australia/NSW832/2020	EPI_ISL_526174	2020_08	29408	0
G	hCoV-19/Australia/NSW833/2020	EPI_ISL_526175	2020_08	29408	0
G	hCoV-19/Australia/NSW834/2020	EPI_ISL_526176	2020_08	29408	0
G	hCoV-19/Australia/NSW835/2020	EPI_ISL_526177	2020_08	29408	0
G	hCoV-19/Australia/NSW836/2020	EPI_ISL_526178	2020_08	29408	0
G	hCoV-19/Australia/NSW837/2020	EPI_ISL_526179	2020_08	29408	0
G	hCoV-19/Australia/NSW838/2020	EPI_ISL_526180	2020_07	29408	0
G	hCoV-19/Australia/NSW839/2020	EPI_ISL_526181	2020_07	29408	0
G	hCoV-19/Australia/NSW840/2020	EPI_ISL_526182	2020_08	29408	0
G	hCoV-19/Australia/NSW841/2020	EPI_ISL_526183	2020_08	29408	0
G	hCoV-19/Australia/NSW842/2020	EPI_ISL_526184	2020_08	29408	0
G	hCoV-19/Australia/NSW843/2020	EPI_ISL_526185	2020_08	29408	0
G	hCoV-19/Australia/NSW844/2020	EPI_ISL_526186	2020_08	29408	0
G	hCoV-19/Australia/NSW845/2020	EPI_ISL_526187	2020_08	29408	0
G	hCoV-19/Australia/NSW846/2020	EPI_ISL_526188	2020_08	29408	0
G	hCoV-19/Australia/NSW847/2020	EPI_ISL_526189	2020_08	29408	0
G	hCoV-19/Australia/NSW848/2020	EPI_ISL_526190	2020_08	29408	0
G	hCoV-19/Australia/NSW849/2020	EPI_ISL_526191	2020_07	29408	0
G	hCoV-19/Australia/NSW850/2020	EPI_ISL_526192	2020_08	29408	0
G	hCoV-19/Australia/NSW851/2020	EPI_ISL_526193	2020_08	29408	0
G	hCoV-19/Australia/NSW852/2020	EPI_ISL_526194	2020_08	29408	0
G	hCoV-19/Australia/NSW853/2020	EPI_ISL_526195	2020_08	29408	0
G	hCoV-19/Australia/NSW854/2020	EPI_ISL_526196	2020_08	29408	0
G	hCoV-19/Australia/NSW855/2020	EPI_ISL_526197	2020_08	29408	0
G	hCoV-19/Australia/NSW856/2020	EPI_ISL_526198	2020_08	29408	0
G	hCoV-19/Australia/NSW857/2020	EPI_ISL_526199	2020_08	29408	0
G	hCoV-19/Australia/NSW858/2020	EPI_ISL_526200	2020_08	29405	0
G	hCoV-19/Australia/NSW859/2020	EPI_ISL_526201	2020_08	29408	0
G	hCoV-19/Australia/NSW860/2020	EPI_ISL_526202	2020_08	29408	0
G	hCoV-19/Australia/NSW861/2020	EPI_ISL_526203	2020_08	29408	0
G	hCoV-19/Australia/NSW862/2020	EPI_ISL_526204	2020_08	29408	0
G	hCoV-19/Australia/NSW863/2020	EPI_ISL_526205	2020_08	29408	0
G	hCoV-19/Australia/NSW864/2020	EPI_ISL_526206	2020_08	29408	0
G	hCoV-19/Australia/NSW865/2020	EPI_ISL_526207	2020_08	29408	0
G	hCoV-19/Australia/NSW866/2020	EPI_ISL_526208	2020_08	29408	0
G	hCoV-19/Australia/NSW867/2020	EPI_ISL_526209	2020_08	29408	0
G	hCoV-19/Australia/NSW868/2020	EPI_ISL_526210	2020_08	29408	0
G	hCoV-19/Australia/NSW869/2020	EPI_ISL_526211	2020_08	29408	0
G	hCoV-19/Australia/NSW870/2020	EPI_ISL_526212	2020_08	29408	0
G	hCoV-19/Australia/NSW871/2020	EPI_ISL_526213	2020_08	29408	0
G	hCoV-19/Australia/NSW872/2020	EPI_ISL_526214	2020_08	29408	0
G	hCoV-19/Australia/QLD955/2020	EPI_ISL_530243	2020_03	29870	5
G	hCoV-19/Australia/QLD962/2020	EPI_ISL_530241	2020_03	29839	2
G	hCoV-19/Australia/QLD963/2020	EPI_ISL_530226	2020_03	29865	7
G	hCoV-19/Australia/QLD964/2020	EPI_ISL_530238	2020_04	29868	8
G	hCoV-19/Australia/QLD965/2020	EPI_ISL_530244	2020_03	29866	4
G	hCoV-19/Australia/QLD979/2020	EPI_ISL_530227	2020_04	29869	10
G	hCoV-19/Australia/QLD984/2020	EPI_ISL_530264	2020_03	29870	1
G	hCoV-19/Australia/QLD985/2020	EPI_ISL_530265	2020_03	29861	10
G	hCoV-19/Australia/QLD986/2020	EPI_ISL_530266	2020_03	29868	6
G	hCoV-19/Australia/QLDID920/2020	EPI_ISL_417032	2020_03	29864	0
G	hCoV-19/Australia/QLDID923/2020	EPI_ISL_418801	2020_03	29835	0
G	hCoV-19/Australia/QLDID935/2020	EPI_ISL_436097	2020_03	29869	0
G	hCoV-19/Australia/SAP012/2020	EPI_ISL_468041	2020_03	29869	14
G	hCoV-19/Australia/SAP034/2020	EPI_ISL_451079	2020_03	29860	120
G	hCoV-19/Australia/SAP044/2020	EPI_ISL_451084	2020_03	29866	13
G	hCoV-19/Australia/SAP048/2020	EPI_ISL_451087	2020_03	29868	1
G	hCoV-19/Australia/SAP049/2020	EPI_ISL_451088	2020_03	29832	164
G	hCoV-19/Australia/SAP052/2020	EPI_ISL_451091	2020_03	29869	0
G	hCoV-19/Australia/SAP068/2020	EPI_ISL_451106	2020_03	29833	38
G	hCoV-19/Australia/SAP069/2020	EPI_ISL_451107	2020_03	29832	192
G	hCoV-19/Australia/SAP079/2020	EPI_ISL_451115	2020_03	29866	10
G	hCoV-19/Australia/SAP087/2020	EPI_ISL_451122	2020_03	29866	22
G	hCoV-19/Australia/SAP090/2020	EPI_ISL_451125	2020_04	29869	14
G	hCoV-19/Australia/SAP095/2020	EPI_ISL_451129	2020_04	29858	235
G	hCoV-19/Australia/SAP127/2020	EPI_ISL_451136	2020_03	29860	93
G	hCoV-19/Australia/SAP146/2020	EPI_ISL_451144	2020_04	29861	14
G	hCoV-19/Australia/SAP147/2020	EPI_ISL_451145	2020_04	29832	19
G	hCoV-19/Australia/SAP151/2020	EPI_ISL_492113	2020_04	29866	18
G	hCoV-19/Australia/SAP203/2020	EPI_ISL_468031	2020_03	29865	27
G	hCoV-19/Australia/SAP206/2020	EPI_ISL_468036	2020_03	29868	17
G	hCoV-19/Australia/SAP220/2020	EPI_ISL_467995	2020_03	29831	234
G	hCoV-19/Australia/SAP234/2020	EPI_ISL_483078	2020_03	29842	207
G	hCoV-19/Australia/SAP246/2020	EPI_ISL_468014	2020_03	29832	29
G	hCoV-19/Australia/SAP273/2020	EPI_ISL_468029	2020_03	29864	19
G	hCoV-19/Australia/SAP284/2020	EPI_ISL_468004	2020_03	29832	149
G	hCoV-19/Australia/SAP288/2020	EPI_ISL_468020	2020_03	29833	158
G	hCoV-19/Australia/SAP297/2020	EPI_ISL_468025	2020_04	29854	15
G	hCoV-19/Australia/SAP298/2020	EPI_ISL_468007	2020_04	29867	84
G	hCoV-19/Australia/SAP318/2020	EPI_ISL_483098	2020_03	29859	267
G	hCoV-19/Australia/SAP334/2020	EPI_ISL_483111	2020_03	29866	17
G	hCoV-19/Australia/SAP336/2020	EPI_ISL_483113	2020_03	29861	0
G	hCoV-19/Australia/SAP342/2020	EPI_ISL_483119	2020_03	29868	0
G	hCoV-19/Australia/SAP349/2020	EPI_ISL_483124	2020_03	29866	18
G	hCoV-19/Australia/SAP370/2020	EPI_ISL_492135	2020_03	29869	0
G	hCoV-19/Australia/SAP383/2020	EPI_ISL_492148	2020_03	29866	0
G	hCoV-19/Australia/SAP397/2020	EPI_ISL_492162	2020_03	29853	18
G	hCoV-19/Australia/SAP433/2020	EPI_ISL_508124	2020_03	29868	0
G	hCoV-19/Australia/SAP435/2020	EPI_ISL_508126	2020_03	29866	1
G	hCoV-19/Australia/SAP438/2020	EPI_ISL_508129	2020_03	29832	14
G	hCoV-19/Australia/SAP445/2020	EPI_ISL_508136	2020_03	29859	0
G	hCoV-19/Australia/SAP448/2020	EPI_ISL_508139	2020_03	29832	18
G	hCoV-19/Australia/VIC1000/2020	EPI_ISL_430484	2020_03	29806	62
G	hCoV-19/Australia/VIC1002/2020	EPI_ISL_430486	2020_03	29812	190
G	hCoV-19/Australia/VIC1008/2020	EPI_ISL_430473	2020_03	29806	185
G	hCoV-19/Australia/VIC1011/2020	EPI_ISL_430547	2020_04	29806	11
G	hCoV-19/Australia/VIC1013/2020	EPI_ISL_430553	2020_04	29812	128
G	hCoV-19/Australia/VIC1018/2020	EPI_ISL_430490	2020_04	29813	186
G	hCoV-19/Australia/VIC1025/2020	EPI_ISL_430532	2020_04	29809	67
G	hCoV-19/Australia/VIC1047/2020	EPI_ISL_430561	2020_04	29796	268
G	hCoV-19/Australia/VIC1048/2020	EPI_ISL_430562	2020_04	29812	282
G	hCoV-19/Australia/VIC1056/2020	EPI_ISL_430669	2020_04	29804	64
G	hCoV-19/Australia/VIC106/2020	EPI_ISL_419820	2020_03	29840	12
G	hCoV-19/Australia/VIC1062/2020	EPI_ISL_430578	2020_04	29816	0
G	hCoV-19/Australia/VIC1067/2020	EPI_ISL_430670	2020_04	29812	0
G	hCoV-19/Australia/VIC1071/2020	EPI_ISL_430581	2020_04	29814	101
G	hCoV-19/Australia/VIC1081/2020	EPI_ISL_430580	2020_04	29814	145
G	hCoV-19/Australia/VIC1086/2020	EPI_ISL_430597	2020_04	29815	7
G	hCoV-19/Australia/VIC1094/2020	EPI_ISL_430583	2020_04	29812	74
G	hCoV-19/Australia/VIC1107/2020	EPI_ISL_430590	2020_04	29812	198
G	hCoV-19/Australia/VIC114/2020	EPI_ISL_419725	2020_03	29840	11
G	hCoV-19/Australia/VIC1157/2020	EPI_ISL_430598	2020_04	29813	35
G	hCoV-19/Australia/VIC119/2020	EPI_ISL_419726	2020_03	29833	245
G	hCoV-19/Australia/VIC1214/2020	EPI_ISL_430505	2020_04	29804	199
G	hCoV-19/Australia/VIC1222/2020	EPI_ISL_430519	2020_04	29812	192
G	hCoV-19/Australia/VIC1224/2020	EPI_ISL_430522	2020_04	29800	186
G	hCoV-19/Australia/VIC1248/2020	EPI_ISL_436114	2020_04	29804	199
G	hCoV-19/Australia/VIC1284/2020	EPI_ISL_430701	2020_04	29819	24
G	hCoV-19/Australia/VIC1313/2020	EPI_ISL_430714	2020_04	29812	35
G	hCoV-19/Australia/VIC1317/2020	EPI_ISL_430691	2020_04	29815	214
G	hCoV-19/Australia/VIC1328/2020	EPI_ISL_430695	2020_04	29819	19
G	hCoV-19/Australia/VIC136/2020	EPI_ISL_419829	2020_03	29859	4
G	hCoV-19/Australia/VIC137/2020	EPI_ISL_419830	2020_03	29855	0
G	hCoV-19/Australia/VIC1378/2020	EPI_ISL_456417	2020_04	29813	184
G	hCoV-19/Australia/VIC1386/2020	EPI_ISL_521871	2020_04	29820	154
G	hCoV-19/Australia/VIC141/2020	EPI_ISL_419838	2020_03	29869	19
G	hCoV-19/Australia/VIC1428/2020	EPI_ISL_456435	2020_04	29813	45
G	hCoV-19/Australia/VIC1436/2020	EPI_ISL_456441	2020_04	29813	128
G	hCoV-19/Australia/VIC1486/2020	EPI_ISL_456455	2020_04	29779	195
G	hCoV-19/Australia/VIC149/2020	EPI_ISL_419846	2020_03	29832	15
G	hCoV-19/Australia/VIC1495/2020	EPI_ISL_456459	2020_04	29799	15
G	hCoV-19/Australia/VIC154/2020	EPI_ISL_419851	2020_03	29832	12
G	hCoV-19/Australia/VIC157/2020	EPI_ISL_419854	2020_03	29866	26
G	hCoV-19/Australia/VIC164/2020	EPI_ISL_419861	2020_03	29861	283
G	hCoV-19/Australia/VIC170/2020	EPI_ISL_419867	2020_03	29831	16
G	hCoV-19/Australia/VIC174/2020	EPI_ISL_419871	2020_03	29859	15
G	hCoV-19/Australia/VIC1798/2020	EPI_ISL_480622	2020_05	29812	186
G	hCoV-19/Australia/VIC192/2020	EPI_ISL_419888	2020_03	29861	12
G	hCoV-19/Australia/VIC195/2020	EPI_ISL_419891	2020_03	29859	4
G	hCoV-19/Australia/VIC198/2020	EPI_ISL_419894	2020_03	29866	32
G	hCoV-19/Australia/VIC1994/2020	EPI_ISL_521900	2020_03	29813	5
G	hCoV-19/Australia/VIC1996/2020	EPI_ISL_521902	2020_03	29802	2
G	hCoV-19/Australia/VIC206/2020	EPI_ISL_419901	2020_03	29862	108
G	hCoV-19/Australia/VIC2075/2020	EPI_ISL_521910	2020_04	29804	59
G	hCoV-19/Australia/VIC2076/2020	EPI_ISL_480616	2020_04	29787	81
G	hCoV-19/Australia/VIC210/2020	EPI_ISL_419905	2020_03	29854	48
G	hCoV-19/Australia/VIC2110/2020	EPI_ISL_480716	2020_06	29836	16
G	hCoV-19/Australia/VIC2137/2020	EPI_ISL_480738	2020_06	29803	0
G	hCoV-19/Australia/VIC217/2020	EPI_ISL_419912	2020_03	29868	10
G	hCoV-19/Australia/VIC2234/2020	EPI_ISL_521971	2020_06	29819	0
G	hCoV-19/Australia/VIC224/2020	EPI_ISL_419919	2020_03	29834	12
G	hCoV-19/Australia/VIC2260/2020	EPI_ISL_521988	2020_06	29815	44
G	hCoV-19/Australia/VIC254/2020	EPI_ISL_419949	2020_03	29868	0
G	hCoV-19/Australia/VIC257/2020	EPI_ISL_419950	2020_03	29870	0
G	hCoV-19/Australia/VIC264/2020	EPI_ISL_419957	2020_03	29864	16
G	hCoV-19/Australia/VIC266/2020	EPI_ISL_419959	2020_03	29832	0
G	hCoV-19/Australia/VIC270/2020	EPI_ISL_419963	2020_03	29840	14
G	hCoV-19/Australia/VIC271/2020	EPI_ISL_419964	2020_03	29833	19
G	hCoV-19/Australia/VIC273/2020	EPI_ISL_419966	2020_03	29870	4
G	hCoV-19/Australia/VIC274/2020	EPI_ISL_419967	2020_03	29868	17
G	hCoV-19/Australia/VIC275/2020	EPI_ISL_419968	2020_03	29832	10
G	hCoV-19/Australia/VIC278/2020	EPI_ISL_419971	2020_03	29869	13
G	hCoV-19/Australia/VIC283/2020	EPI_ISL_419974	2020_03	29869	12
G	hCoV-19/Australia/VIC284/2020	EPI_ISL_419975	2020_03	29865	2
G	hCoV-19/Australia/VIC285/2020	EPI_ISL_419976	2020_03	29842	11
G	hCoV-19/Australia/VIC286/2020	EPI_ISL_419977	2020_03	29868	12
G	hCoV-19/Australia/VIC289/2020	EPI_ISL_419980	2020_03	29869	4
G	hCoV-19/Australia/VIC300/2020	EPI_ISL_419991	2020_03	29832	2
G	hCoV-19/Australia/VIC302/2020	EPI_ISL_419993	2020_03	29866	4
G	hCoV-19/Australia/VIC303/2020	EPI_ISL_419994	2020_03	29832	9
G	hCoV-19/Australia/VIC3070/2020	EPI_ISL_520777	2020_07	29809	124
G	hCoV-19/Australia/VIC312/2020	EPI_ISL_420003	2020_03	29834	3
G	hCoV-19/Australia/VIC318/2020	EPI_ISL_420009	2020_03	29868	14
G	hCoV-19/Australia/VIC319/2020	EPI_ISL_420010	2020_03	29869	12
G	hCoV-19/Australia/VIC320/2020	EPI_ISL_420011	2020_03	29866	15
G	hCoV-19/Australia/VIC323/2020	EPI_ISL_420014	2020_03	29845	17
G	hCoV-19/Australia/VIC329/2020	EPI_ISL_426639	2020_03	29866	16
G	hCoV-19/Australia/VIC337/2020	EPI_ISL_426646	2020_03	29853	17
G	hCoV-19/Australia/VIC340/2020	EPI_ISL_426649	2020_03	29859	10
G	hCoV-19/Australia/VIC341/2020	EPI_ISL_426650	2020_03	29861	27
G	hCoV-19/Australia/VIC343/2020	EPI_ISL_426652	2020_03	29807	42
G	hCoV-19/Australia/VIC375/2020	EPI_ISL_426682	2020_03	29858	18
G	hCoV-19/Australia/VIC38/2020	EPI_ISL_419756	2020_03	29832	11
G	hCoV-19/Australia/VIC384/2020	EPI_ISL_426691	2020_03	29805	0
G	hCoV-19/Australia/VIC398/2020	EPI_ISL_426701	2020_03	29866	22
G	hCoV-19/Australia/VIC399/2020	EPI_ISL_426702	2020_03	29832	19
G	hCoV-19/Australia/VIC414/2020	EPI_ISL_426714	2020_03	29818	185
G	hCoV-19/Australia/VIC417/2020	EPI_ISL_426717	2020_03	29815	190
G	hCoV-19/Australia/VIC437/2020	EPI_ISL_426734	2020_03	29813	185
G	hCoV-19/Australia/VIC44/2020	EPI_ISL_419767	2020_03	29832	4
G	hCoV-19/Australia/VIC440/2020	EPI_ISL_426737	2020_03	29813	185
G	hCoV-19/Australia/VIC444/2020	EPI_ISL_426741	2020_03	29826	184
G	hCoV-19/Australia/VIC449/2020	EPI_ISL_426745	2020_03	29836	4
G	hCoV-19/Australia/VIC451/2020	EPI_ISL_426747	2020_03	29815	190
G	hCoV-19/Australia/VIC460/2020	EPI_ISL_426753	2020_03	29815	239
G	hCoV-19/Australia/VIC468/2020	EPI_ISL_426761	2020_03	29819	186
G	hCoV-19/Australia/VIC472/2020	EPI_ISL_426764	2020_03	29817	169
G	hCoV-19/Australia/VIC475/2020	EPI_ISL_426907	2020_03	29813	98
G	hCoV-19/Australia/VIC478/2020	EPI_ISL_426910	2020_03	29809	198
G	hCoV-19/Australia/VIC486/2020	EPI_ISL_426917	2020_03	29867	248
G	hCoV-19/Australia/VIC488/2020	EPI_ISL_426919	2020_03	29815	185
G	hCoV-19/Australia/VIC489/2020	EPI_ISL_426920	2020_03	29803	120
G	hCoV-19/Australia/VIC490/2020	EPI_ISL_426921	2020_03	29831	201
G	hCoV-19/Australia/VIC491/2020	EPI_ISL_426922	2020_03	29812	184
G	hCoV-19/Australia/VIC504/2020	EPI_ISL_426775	2020_03	29817	0
G	hCoV-19/Australia/VIC514/2020	EPI_ISL_426784	2020_03	29835	281
G	hCoV-19/Australia/VIC520/2020	EPI_ISL_426789	2020_03	29814	0
G	hCoV-19/Australia/VIC527/2020	EPI_ISL_426793	2020_03	29833	20
G	hCoV-19/Australia/VIC530/2020	EPI_ISL_426796	2020_03	29818	0
G	hCoV-19/Australia/VIC534/2020	EPI_ISL_426800	2020_03	29817	11
G	hCoV-19/Australia/VIC536/2020	EPI_ISL_426802	2020_03	29816	2
G	hCoV-19/Australia/VIC537/2020	EPI_ISL_426803	2020_03	29813	199
G	hCoV-19/Australia/VIC54/2020	EPI_ISL_419770	2020_03	29858	3
G	hCoV-19/Australia/VIC541/2020	EPI_ISL_426806	2020_03	29813	0
G	hCoV-19/Australia/VIC563/2020	EPI_ISL_426824	2020_03	29817	9
G	hCoV-19/Australia/VIC570/2020	EPI_ISL_426830	2020_03	29812	238
G	hCoV-19/Australia/VIC576/2020	EPI_ISL_426835	2020_03	29815	157
G	hCoV-19/Australia/VIC578/2020	EPI_ISL_426836	2020_03	29815	205
G	hCoV-19/Australia/VIC581/2020	EPI_ISL_426838	2020_03	29813	237
G	hCoV-19/Australia/VIC583/2020	EPI_ISL_426840	2020_03	29813	163
G	hCoV-19/Australia/VIC589/2020	EPI_ISL_426846	2020_03	29839	190
G	hCoV-19/Australia/VIC590/2020	EPI_ISL_426847	2020_03	29813	110
G	hCoV-19/Australia/VIC610/2020	EPI_ISL_426864	2020_03	29832	46
G	hCoV-19/Australia/VIC619/2020	EPI_ISL_426923	2020_03	29833	200
G	hCoV-19/Australia/VIC62/2020	EPI_ISL_419774	2020_03	29832	5
G	hCoV-19/Australia/VIC620/2020	EPI_ISL_426924	2020_03	29813	183
G	hCoV-19/Australia/VIC622/2020	EPI_ISL_426926	2020_03	29816	184
G	hCoV-19/Australia/VIC628/2020	EPI_ISL_426932	2020_03	29823	0
G	hCoV-19/Australia/VIC63/2020	EPI_ISL_419775	2020_03	29866	248
G	hCoV-19/Australia/VIC635/2020	EPI_ISL_426876	2020_03	29815	87
G	hCoV-19/Australia/VIC637/2020	EPI_ISL_426933	2020_03	29842	178
G	hCoV-19/Australia/VIC652/2020	EPI_ISL_426948	2020_03	29842	20
G	hCoV-19/Australia/VIC666/2020	EPI_ISL_426962	2020_03	29849	13
G	hCoV-19/Australia/VIC682/2020	EPI_ISL_426977	2020_03	29818	0
G	hCoV-19/Australia/VIC694/2020	EPI_ISL_426986	2020_03	29853	1
G	hCoV-19/Australia/VIC706/2020	EPI_ISL_426993	2020_03	29833	182
G	hCoV-19/Australia/VIC708/2020	EPI_ISL_426995	2020_03	29832	87
G	hCoV-19/Australia/VIC7169/2020	EPI_ISL_521450	2020_04	29791	96
G	hCoV-19/Australia/VIC718/2020	EPI_ISL_427002	2020_03	29819	0
G	hCoV-19/Australia/VIC735/2020	EPI_ISL_427014	2020_03	29815	185
G	hCoV-19/Australia/VIC737/2020	EPI_ISL_427016	2020_03	29817	166
G	hCoV-19/Australia/VIC738/2020	EPI_ISL_427017	2020_03	29832	158
G	hCoV-19/Australia/VIC75/2020	EPI_ISL_419787	2020_03	29832	41
G	hCoV-19/Australia/VIC760/2020	EPI_ISL_427036	2020_03	29814	268
G	hCoV-19/Australia/VIC781/2020	EPI_ISL_427056	2020_03	29813	216
G	hCoV-19/Australia/VIC783/2020	EPI_ISL_427058	2020_03	29817	7
G	hCoV-19/Australia/VIC785/2020	EPI_ISL_427060	2020_03	29818	0
G	hCoV-19/Australia/VIC786/2020	EPI_ISL_427061	2020_03	29832	204
G	hCoV-19/Australia/VIC787/2020	EPI_ISL_427062	2020_03	29813	185
G	hCoV-19/Australia/VIC793/2020	EPI_ISL_427068	2020_03	29832	188
G	hCoV-19/Australia/VIC794/2020	EPI_ISL_427069	2020_03	29866	189
G	hCoV-19/Australia/VIC796/2020	EPI_ISL_427070	2020_03	29854	59
G	hCoV-19/Australia/VIC797/2020	EPI_ISL_427071	2020_04	29815	75
G	hCoV-19/Australia/VIC798/2020	EPI_ISL_427072	2020_04	29815	114
G	hCoV-19/Australia/VIC800/2020	EPI_ISL_427074	2020_04	29813	58
G	hCoV-19/Australia/VIC802/2020	EPI_ISL_427076	2020_04	29835	201
G	hCoV-19/Australia/VIC804/2020	EPI_ISL_427078	2020_04	29834	289
G	hCoV-19/Australia/VIC821/2020	EPI_ISL_427093	2020_04	29832	234
G	hCoV-19/Australia/VIC843/2020	EPI_ISL_427103	2020_04	29855	11
G	hCoV-19/Australia/VIC853/2020	EPI_ISL_427113	2020_04	29858	4
G	hCoV-19/Australia/VIC870/2020	EPI_ISL_427125	2020_04	29832	97
G	hCoV-19/Australia/VIC873/2020	EPI_ISL_427128	2020_04	29854	125
G	hCoV-19/Australia/VIC874/2020	EPI_ISL_427129	2020_04	29867	9
G	hCoV-19/Australia/VIC89/2020	EPI_ISL_419800	2020_03	29862	13
G	hCoV-19/Australia/VIC893/2020	EPI_ISL_427145	2020_04	29821	221
G	hCoV-19/Australia/VIC898/2020	EPI_ISL_427148	2020_04	29832	17
G	hCoV-19/Australia/VIC91/2020	EPI_ISL_419804	2020_03	29868	15
G	hCoV-19/Australia/VIC912/2020	EPI_ISL_426881	2020_03	29831	19
G	hCoV-19/Australia/VIC92/2020	EPI_ISL_419809	2020_03	29866	11
G	hCoV-19/Australia/VIC920/2020	EPI_ISL_427153	2020_03	29861	199
G	hCoV-19/Australia/VIC929/2020	EPI_ISL_427157	2020_03	29834	221
G	hCoV-19/Australia/VIC938/2020	EPI_ISL_430472	2020_03	29813	138
G	hCoV-19/Australia/VIC946/2020	EPI_ISL_430640	2020_03	29806	188
G	hCoV-19/Australia/VIC964/2020	EPI_ISL_430655	2020_03	29813	1
G	hCoV-19/Australia/VIC971/2020	EPI_ISL_430661	2020_03	29796	188
G	hCoV-19/Australia/VIC974/2020	EPI_ISL_430659	2020_03	29806	185
G	hCoV-19/Australia/VIC975/2020	EPI_ISL_430658	2020_03	29801	186
G	hCoV-19/Australia/VIC98/2020	EPI_ISL_419810	2020_03	29862	16
G	hCoV-19/Australia/VIC983/2020	EPI_ISL_430545	2020_03	29847	1
G	hCoV-19/Australia/VIC985/2020	EPI_ISL_430554	2020_03	29802	236
G	hCoV-19/Australia/VIC989/2020	EPI_ISL_430551	2020_03	29814	0
G	hCoV-19/Australia/VIC991/2020	EPI_ISL_430474	2020_03	29812	212
G	hCoV-19/Australia/VIC994/2020	EPI_ISL_430478	2020_03	29818	186
G	hCoV-19/Australia/VIC997/2020	EPI_ISL_430481	2020_03	29815	188
G	hCoV-19/Australia/WA01/2020	EPI_ISL_420531	2020_03	29748	0
G	hCoV-19/Australia/WA02/2020	EPI_ISL_420532	2020_03	29742	0
G	hCoV-19/Australia/WA06/2020	EPI_ISL_420534	2020_03	29742	0
G	hCoV-19/Australia/WA103/2020	EPI_ISL_512756	2020_03	29405	0
G	hCoV-19/Australia/WA104/2020	EPI_ISL_512757	2020_04	29405	0
G	hCoV-19/Australia/WA105/2020	EPI_ISL_512758	2020_04	29405	0
G	hCoV-19/Australia/WA108/2020	EPI_ISL_512761	2020_03	29405	0
G	hCoV-19/Australia/WA109/2020	EPI_ISL_512762	2020_03	29405	0
G	hCoV-19/Australia/WA111/2020	EPI_ISL_512764	2020_03	29405	0
G	hCoV-19/Australia/WA112/2020	EPI_ISL_512765	2020_07	29405	0
G	hCoV-19/Australia/WA12/2020	EPI_ISL_470830	2020_03	29803	0
G	hCoV-19/Australia/WA15/2020	EPI_ISL_470833	2020_04	29801	0
G	hCoV-19/Australia/WA17/2020	EPI_ISL_470835	2020_04	29803	0
G	hCoV-19/Australia/WA37/2020	EPI_ISL_470854	2020_04	29793	0
G	hCoV-19/Australia/WA38/2020	EPI_ISL_470855	2020_04	29795	0
G	hCoV-19/Australia/WA41/2020	EPI_ISL_470858	2020_03	29798	0
G	hCoV-19/Australia/WA44/2020	EPI_ISL_470861	2020_04	29801	0
G	hCoV-19/Australia/WA45/2020	EPI_ISL_470862	2020_04	29793	0
G	hCoV-19/Australia/WA58/2020	EPI_ISL_470875	2020_04	29662	0
G	hCoV-19/Australia/WA60/2020	EPI_ISL_512713	2020_04	29405	0
G	hCoV-19/Australia/WA61/2020	EPI_ISL_512714	2020_04	29405	0
G	hCoV-19/Australia/WA62/2020	EPI_ISL_512715	2020_05	29405	0
G	hCoV-19/Australia/WA63/2020	EPI_ISL_512716	2020_05	29405	0
G	hCoV-19/Australia/WA64/2020	EPI_ISL_512717	2020_05	29405	0
G	hCoV-19/Australia/WA66/2020	EPI_ISL_512719	2020_06	29405	0
G	hCoV-19/Australia/WA67/2020	EPI_ISL_512720	2020_06	29405	10
G	hCoV-19/Australia/WA69/2020	EPI_ISL_512722	2020_07	29405	0
G	hCoV-19/Australia/WA70/2020	EPI_ISL_512723	2020_07	29405	0
G	hCoV-19/Australia/WA71/2020	EPI_ISL_512724	2020_07	29405	0
G	hCoV-19/Australia/WA72/2020	EPI_ISL_512725	2020_07	29405	0
G	hCoV-19/Australia/WA74/2020	EPI_ISL_512727	2020_07	29405	0
G	hCoV-19/Australia/WA75/2020	EPI_ISL_512728	2020_07	29405	0
G	hCoV-19/Australia/WA77/2020	EPI_ISL_512730	2020_07	29405	0
G	hCoV-19/Australia/WA79/2020	EPI_ISL_512732	2020_07	29405	0
G	hCoV-19/Australia/WA81/2020	EPI_ISL_512734	2020_07	29405	0
G	hCoV-19/Australia/WA82/2020	EPI_ISL_512735	2020_07	29405	0
G	hCoV-19/Australia/WA84/2020	EPI_ISL_512737	2020_05	29405	0
G	hCoV-19/Australia/WA85/2020	EPI_ISL_512738	2020_03	29405	0
G	hCoV-19/Australia/WA86/2020	EPI_ISL_512739	2020_03	29405	0
G	hCoV-19/Australia/WA89/2020	EPI_ISL_512742	2020_03	29405	0
G	hCoV-19/Australia/WA96/2020	EPI_ISL_512749	2020_03	29405	0
G	hCoV-19/Australia/WA97/2020	EPI_ISL_512750	2020_03	29405	0
G	hCoV-19/Australia/WA99/2020	EPI_ISL_512752	2020_04	29405	0
G	hCoV-19/Austria/CeMM0006/2020	EPI_ISL_419659	2020_03	29815	1
G	hCoV-19/Austria/CeMM0008/2020	EPI_ISL_419661	2020_03	29816	6
G	hCoV-19/Austria/CeMM0011/2020	EPI_ISL_419664	2020_03	29817	1
G	hCoV-19/Austria/CeMM0014/2020	EPI_ISL_419667	2020_03	29818	185
G	hCoV-19/Austria/CeMM0016/2020	EPI_ISL_419669	2020_03	29819	1
G	hCoV-19/Austria/CeMM0020/2020	EPI_ISL_419673	2020_03	29837	3
G	hCoV-19/Austria/CeMM0041/2020	EPI_ISL_437929	2020_03	29838	3
G	hCoV-19/Austria/CeMM0068/2020	EPI_ISL_437940	2020_03	29840	2
G	hCoV-19/Austria/CeMM0071/2020	EPI_ISL_437941	2020_03	29806	2
G	hCoV-19/Austria/CeMM0086/2020	EPI_ISL_437950	2020_03	29834	2
G	hCoV-19/Austria/CeMM0106/2020	EPI_ISL_437966	2020_03	29812	5
G	hCoV-19/Austria/CeMM0109/2020	EPI_ISL_437968	2020_03	29826	10
G	hCoV-19/Austria/CeMM0115/2020	EPI_ISL_437973	2020_03	29806	1
G	hCoV-19/Austria/CeMM0120/2020	EPI_ISL_437977	2020_03	29806	5
G	hCoV-19/Austria/CeMM0126/2020	EPI_ISL_437982	2020_03	29823	19
G	hCoV-19/Austria/CeMM0127/2020	EPI_ISL_437983	2020_03	29834	9
G	hCoV-19/Austria/CeMM0140/2020	EPI_ISL_437992	2020_03	29834	8
G	hCoV-19/Austria/CeMM0155/2020	EPI_ISL_438001	2020_03	29840	3
G	hCoV-19/Austria/CeMM0156/2020	EPI_ISL_438002	2020_03	29821	5
G	hCoV-19/Austria/CeMM0163/2020	EPI_ISL_438009	2020_03	29834	9
G	hCoV-19/Austria/CeMM0186/2020	EPI_ISL_438028	2020_03	29840	2
G	hCoV-19/Austria/CeMM0199/2020	EPI_ISL_438040	2020_03	29840	2
G	hCoV-19/Austria/CeMM0210/2020	EPI_ISL_438047	2020_03	29840	4
G	hCoV-19/Austria/CeMM0216/2020	EPI_ISL_438050	2020_03	29840	1
G	hCoV-19/Austria/CeMM0221/2020	EPI_ISL_438055	2020_03	29840	0
G	hCoV-19/Austria/CeMM0222/2020	EPI_ISL_438056	2020_03	29840	2
G	hCoV-19/Austria/CeMM0223/2020	EPI_ISL_438057	2020_03	29831	3
G	hCoV-19/Austria/CeMM0224/2020	EPI_ISL_438058	2020_03	29834	2
G	hCoV-19/Austria/CeMM0236/2020	EPI_ISL_475772	2020_03	29806	244
G	hCoV-19/Austria/CeMM0237/2020	EPI_ISL_438067	2020_03	29818	62
G	hCoV-19/Austria/CeMM0242/2020	EPI_ISL_438072	2020_03	29834	3
G	hCoV-19/Austria/CeMM0243/2020	EPI_ISL_438073	2020_03	29840	1
G	hCoV-19/Austria/CeMM0249/2020	EPI_ISL_438079	2020_03	29840	1
G	hCoV-19/Austria/CeMM0251/2020	EPI_ISL_438081	2020_03	29821	8
G	hCoV-19/Austria/CeMM0257/2020	EPI_ISL_438086	2020_03	29834	2
G	hCoV-19/Austria/CeMM0260/2020	EPI_ISL_438089	2020_03	29834	2
G	hCoV-19/Austria/CeMM0261/2020	EPI_ISL_438090	2020_03	29832	1
G	hCoV-19/Austria/CeMM0262/2020	EPI_ISL_438091	2020_03	29823	62
G	hCoV-19/Austria/CeMM0265/2020	EPI_ISL_438094	2020_03	29806	3
G	hCoV-19/Austria/CeMM0267/2020	EPI_ISL_438096	2020_03	29806	1
G	hCoV-19/Austria/CeMM0268/2020	EPI_ISL_475773	2020_03	29834	261
G	hCoV-19/Austria/CeMM0269/2020	EPI_ISL_438097	2020_03	29812	4
G	hCoV-19/Austria/CeMM0275/2020	EPI_ISL_438102	2020_03	29834	3
G	hCoV-19/Austria/CeMM0276/2020	EPI_ISL_438103	2020_03	29834	2
G	hCoV-19/Austria/CeMM0278/2020	EPI_ISL_438105	2020_03	29834	1
G	hCoV-19/Austria/CeMM0280/2020	EPI_ISL_438107	2020_03	29834	3
G	hCoV-19/Austria/CeMM0281/2020	EPI_ISL_438108	2020_03	29840	1
G	hCoV-19/Austria/CeMM0288/2020	EPI_ISL_438113	2020_03	29834	3
G	hCoV-19/Austria/CeMM0292/2020	EPI_ISL_438116	2020_03	29806	6
G	hCoV-19/Austria/CeMM0295/2020	EPI_ISL_438118	2020_03	29827	4
G	hCoV-19/Austria/CeMM0296/2020	EPI_ISL_438119	2020_03	29840	1
G	hCoV-19/Austria/CeMM0298/2020	EPI_ISL_475774	2020_03	29782	2
G	hCoV-19/Austria/CeMM0300/2020	EPI_ISL_475776	2020_03	29782	1
G	hCoV-19/Austria/CeMM0308/2020	EPI_ISL_475782	2020_03	29782	0
G	hCoV-19/Austria/CeMM0311/2020	EPI_ISL_475783	2020_03	29782	0
G	hCoV-19/Austria/CeMM0312/2020	EPI_ISL_475784	2020_03	29782	5
G	hCoV-19/Austria/CeMM0313/2020	EPI_ISL_475785	2020_03	29782	0
G	hCoV-19/Austria/CeMM0314/2020	EPI_ISL_475786	2020_03	29782	0
G	hCoV-19/Austria/CeMM0324/2020	EPI_ISL_475794	2020_04	29782	0
G	hCoV-19/Austria/CeMM0330/2020	EPI_ISL_475797	2020_04	29782	4
G	hCoV-19/Austria/CeMM0331/2020	EPI_ISL_475798	2020_04	29782	2
G	hCoV-19/Austria/CeMM0333/2020	EPI_ISL_475799	2020_04	29782	0
G	hCoV-19/Austria/CeMM0337/2020	EPI_ISL_475800	2020_04	29782	0
G	hCoV-19/Austria/CeMM0340/2020	EPI_ISL_475801	2020_04	29782	2
G	hCoV-19/Austria/CeMM0341/2020	EPI_ISL_475802	2020_04	29782	96
G	hCoV-19/Austria/CeMM0350/2020	EPI_ISL_475809	2020_04	29782	23
G	hCoV-19/Austria/CeMM0351/2020	EPI_ISL_475810	2020_04	29782	0
G	hCoV-19/Austria/CeMM0352/2020	EPI_ISL_475811	2020_04	29782	0
G	hCoV-19/Austria/CeMM0366/2020	EPI_ISL_475813	2020_03	29782	0
G	hCoV-19/Austria/CeMM0368/2020	EPI_ISL_475815	2020_03	29782	1
G	hCoV-19/Austria/CeMM0372/2020	EPI_ISL_475817	2020_03	29782	107
G	hCoV-19/Austria/CeMM0373/2020	EPI_ISL_475818	2020_03	29782	1
G	hCoV-19/Austria/CeMM0386/2020	EPI_ISL_475828	2020_04	29782	2
G	hCoV-19/Austria/CeMM0390/2020	EPI_ISL_475830	2020_03	29782	0
G	hCoV-19/Austria/CeMM0397/2020	EPI_ISL_475834	2020_03	29782	1
G	hCoV-19/Austria/CeMM0400/2020	EPI_ISL_475835	2020_04	29782	2
G	hCoV-19/Austria/CeMM0404/2020	EPI_ISL_475839	2020_03	29782	0
G	hCoV-19/Austria/CeMM0408/2020	EPI_ISL_475840	2020_03	29782	4
G	hCoV-19/Austria/CeMM0417/2020	EPI_ISL_475845	2020_03	29782	3
G	hCoV-19/Austria/CeMM0424/2020	EPI_ISL_475852	2020_04	29782	0
G	hCoV-19/Austria/CeMM0426/2020	EPI_ISL_475854	2020_03	29782	0
G	hCoV-19/Austria/CeMM0432/2020	EPI_ISL_475859	2020_03	29782	1
G	hCoV-19/Austria/CeMM0435/2020	EPI_ISL_475861	2020_04	29782	0
G	hCoV-19/Austria/CeMM0436/2020	EPI_ISL_475862	2020_04	29782	0
G	hCoV-19/Austria/CeMM0449/2020	EPI_ISL_475866	2020_03	29782	1
G	hCoV-19/Austria/CeMM0454/2020	EPI_ISL_475869	2020_03	29782	0
G	hCoV-19/Austria/CeMM0466/2020	EPI_ISL_475875	2020_03	29782	0
G	hCoV-19/Austria/CeMM0468/2020	EPI_ISL_475876	2020_03	29782	0
G	hCoV-19/Austria/CeMM0475/2020	EPI_ISL_475880	2020_03	29782	0
G	hCoV-19/Austria/CeMM0480/2020	EPI_ISL_475883	2020_03	29782	95
G	hCoV-19/Austria/CeMM0483/2020	EPI_ISL_475885	2020_04	29782	4
G	hCoV-19/Austria/CeMM0521/2020	EPI_ISL_475893	2020_03	29782	0
G	hCoV-19/Austria/CeMM0527/2020	EPI_ISL_475894	2020_04	29782	1
G	hCoV-19/Austria/CeMM0528/2020	EPI_ISL_475895	2020_04	29782	0
G	hCoV-19/Austria/CeMM0532/2020	EPI_ISL_475897	2020_04	29782	0
G	hCoV-19/Austria/CeMM0540/2020	EPI_ISL_475902	2020_04	29782	0
G	hCoV-19/Austria/CeMM0553/2020	EPI_ISL_475904	2020_05	29782	11
G	hCoV-19/Austria/CeMM0577/2020	EPI_ISL_475924	2020_03	29782	0
G	hCoV-19/Austria/CeMM0579/2020	EPI_ISL_475926	2020_03	29782	0
G	hCoV-19/Austria/CeMM0580/2020	EPI_ISL_475927	2020_03	29782	0
G	hCoV-19/Austria/CeMM0637/2020	EPI_ISL_475935	2020_04	29782	8
G	hCoV-19/Austria/CeMM0639/2020	EPI_ISL_475936	2020_05	29782	0
G	hCoV-19/Austria/MUV_001/2020	EPI_ISL_485603	2020_04	29826	0
G	hCoV-19/Bahrein/BAH-09/2020	EPI_ISL_483550	2020_03	29775	0
G	hCoV-19/Bangladesh/Akbiomed-01/2020	EPI_ISL_445244	2020_04	29823	0
G	hCoV-19/Bangladesh/BARJ-CVASU-CTG-511/2020	EPI_ISL_450343	2020_05	29550	0
G	hCoV-19/Bangladesh/BARJ-CVASU-CTG-517/2020	EPI_ISL_450344	2020_05	29529	0
G	hCoV-19/Bangladesh/BCSIR-NILMRC-088/2020	EPI_ISL_466686	2020_05	29870	0
G	hCoV-19/Bangladesh/BCSIR-NILMRC-222/2020	EPI_ISL_487362	2020_07	29868	0
G	hCoV-19/Bangladesh/BCSIR-NILMRC-287/2020	EPI_ISL_504177	2020_07	29870	0
G	hCoV-19/Bangladesh/CHRF-0002/2020	EPI_ISL_468070	2020_04	29866	1
G	hCoV-19/Bangladesh/CHRF-0007/2020	EPI_ISL_468075	2020_05	29870	2
G	hCoV-19/Bangladesh/CHRF-0010/2020	EPI_ISL_468078	2020_05	29863	0
G	hCoV-19/Bangladesh/CHRF-0019/2020	EPI_ISL_492030	2020_05	29813	3
G	hCoV-19/Bangladesh/DNAS-CPH-466/2020	EPI_ISL_445216	2020_04	29827	0
G	hCoV-19/Bangladesh/DU-50768/2020	EPI_ISL_450843	2020_05	29845	0
G	hCoV-19/Beijing/DT-travelES01/2020	EPI_ISL_452343	2020_03	29870	0
G	hCoV-19/Beijing/DT-travelES03/2020	EPI_ISL_452345	2020_03	29870	0
G	hCoV-19/Beijing/DT-travelES04/2020	EPI_ISL_452346	2020_03	29870	0
G	hCoV-19/Beijing/DT-travelFR02/2020	EPI_ISL_452337	2020_03	29870	0
G	hCoV-19/Beijing/DT-travelGR01/2020	EPI_ISL_452347	2020_03	29870	0
G	hCoV-19/Beijing/DT-travelIT01/2020	EPI_ISL_452352	2020_03	29870	0
G	hCoV-19/Beijing/DT-travelIT02/2020	EPI_ISL_452353	2020_03	29870	0
G	hCoV-19/Beijing/DT-travelIT03/2020	EPI_ISL_452354	2020_03	29870	0
G	hCoV-19/Beijing/DT-travelMX01/2020	EPI_ISL_452341	2020_03	29870	0
G	hCoV-19/Beijing/DT-travelUK03/2020	EPI_ISL_452356	2020_03	29870	0
G	hCoV-19/Beijing/DT-travelUSA03/2020	EPI_ISL_452340	2020_03	29870	0
G	hCoV-19/Beijing/DT-travelUSA04/2020	EPI_ISL_452339	2020_03	29870	0
G	hCoV-19/Belarus/ChVir2073/2020	EPI_ISL_419693	2020_03	29863	0
G	hCoV-19/Belgium/20A30/2020	EPI_ISL_451935	2020_03	29839	0
G	hCoV-19/Belgium/20A38/2020	EPI_ISL_452148	2020_04	29833	0
G	hCoV-19/Belgium/20A49/2020	EPI_ISL_452151	2020_04	29833	0
G	hCoV-19/Belgium/20A55/2020	EPI_ISL_452152	2020_04	29836	0
G	hCoV-19/Belgium/AA-0408412/2020	EPI_ISL_462266	2020_04	29782	0
G	hCoV-19/Belgium/AF-0327321/2020	EPI_ISL_462175	2020_03	29782	0
G	hCoV-19/Belgium/AGR-0324174/2020	EPI_ISL_420431	2020_03	29782	0
G	hCoV-19/Belgium/AO-04074040/2020	EPI_ISL_462258	2020_04	29782	0
G	hCoV-19/Belgium/BD0331362/2020	EPI_ISL_462216	2020_03	29782	0
G	hCoV-19/Belgium/BDW-030694/2020	EPI_ISL_420350	2020_03	29782	0
G	hCoV-19/Belgium/BEG-0324149/2020	EPI_ISL_420406	2020_03	29782	22
G	hCoV-19/Belgium/BG-030551/2020	EPI_ISL_418806	2020_03	29782	0
G	hCoV-19/Belgium/BJA-0409406/2020	EPI_ISL_462260	2020_04	29782	0
G	hCoV-19/Belgium/BM-03012/2020	EPI_ISL_415154	2020_03	29782	0
G	hCoV-19/Belgium/BM-030687/2020	EPI_ISL_420343	2020_03	29782	12
G	hCoV-19/Belgium/BS-0325183/2020	EPI_ISL_420440	2020_03	29782	0
G	hCoV-19/Belgium/BWM-0311356/2020	EPI_ISL_462210	2020_03	29782	0
G	hCoV-19/Belgium/CA-0319111/2020	EPI_ISL_420368	2020_03	29782	1
G	hCoV-19/Belgium/CCM-0324167/2020	EPI_ISL_420424	2020_03	29782	0
G	hCoV-19/Belgium/CJE-0325178/2020	EPI_ISL_420435	2020_03	29782	0
G	hCoV-19/Belgium/CJM-0323175/2020	EPI_ISL_420432	2020_03	29782	0
G	hCoV-19/Belgium/CK-0324150/2020	EPI_ISL_420407	2020_03	29782	0
G	hCoV-19/Belgium/CK-0404276/2020	EPI_ISL_464070	2020_04	29782	0
G	hCoV-19/Belgium/DA-030691/2020	EPI_ISL_420347	2020_03	29782	0
G	hCoV-19/Belgium/DA-0319106/2020	EPI_ISL_420362	2020_03	29782	0
G	hCoV-19/Belgium/DB-03023/2020	EPI_ISL_416470	2020_03	29782	0
G	hCoV-19/Belgium/DB-0323140/2020	EPI_ISL_420397	2020_03	29782	0
G	hCoV-19/Belgium/DC-0326350/2020	EPI_ISL_462204	2020_03	29782	0
G	hCoV-19/Belgium/DCB-0324163/2020	EPI_ISL_420420	2020_03	29782	0
G	hCoV-19/Belgium/DCS-0325158/2020	EPI_ISL_420415	2020_03	29782	0
G	hCoV-19/Belgium/DEJ-0403381/2020	EPI_ISL_462235	2020_04	29782	0
G	hCoV-19/Belgium/DJ-0323409/2020	EPI_ISL_462263	2020_03	29782	0
G	hCoV-19/Belgium/DJ-0409407/2020	EPI_ISL_462261	2020_04	29782	0
G	hCoV-19/Belgium/DJS-0330307/2020	EPI_ISL_462161	2020_03	29782	0
G	hCoV-19/Belgium/DLDJ-030569/2020	EPI_ISL_420325	2020_03	29782	0
G	hCoV-19/Belgium/DMT-0411408/2020	EPI_ISL_462262	2020_04	29782	0
G	hCoV-19/Belgium/DNM-0330351/2020	EPI_ISL_462205	2020_03	29782	0
G	hCoV-19/Belgium/DPG-0325123/2020	EPI_ISL_420380	2020_03	29782	0
G	hCoV-19/Belgium/DPR-0406398/2020	EPI_ISL_462252	2020_04	29782	0
G	hCoV-19/Belgium/DRR-0401366/2020	EPI_ISL_462220	2020_04	29782	0
G	hCoV-19/Belgium/DRV-0325157/2020	EPI_ISL_420414	2020_03	29782	0
G	hCoV-19/Belgium/DWW-0330306/2020	EPI_ISL_462160	2020_03	29782	0
G	hCoV-19/Belgium/EBN-0323116/2020	EPI_ISL_420373	2020_03	29782	0
G	hCoV-19/Belgium/EC-0325128/2020	EPI_ISL_420385	2020_03	29782	0
G	hCoV-19/Belgium/ECC-030686/2020	EPI_ISL_420342	2020_03	29782	0
G	hCoV-19/Belgium/EM-0407403/2020	EPI_ISL_462257	2020_04	29782	0
G	hCoV-19/Belgium/FA-0328311/2020	EPI_ISL_462165	2020_03	29782	0
G	hCoV-19/Belgium/FAE-030948/2020	EPI_ISL_420445	2020_03	29782	0
G	hCoV-19/Belgium/FFJ-0324124/2020	EPI_ISL_420381	2020_03	29782	0
G	hCoV-19/Belgium/FM-030592/2020	EPI_ISL_420348	2020_03	29782	18
G	hCoV-19/Belgium/FM-0408414/2020	EPI_ISL_462268	2020_04	29782	0
G	hCoV-19/Belgium/GC-0328313/2020	EPI_ISL_462167	2020_03	29782	0
G	hCoV-19/Belgium/GE-030573/2020	EPI_ISL_420329	2020_03	29782	0
G	hCoV-19/Belgium/GE-0317105/2020	EPI_ISL_420361	2020_03	29782	0
G	hCoV-19/Belgium/GJM-0328354/2020	EPI_ISL_462208	2020_03	29782	0
G	hCoV-19/Belgium/GL-030546/2020	EPI_ISL_418792	2020_03	29782	0
G	hCoV-19/Belgium/GLA-0324179/2020	EPI_ISL_420436	2020_03	29782	0
G	hCoV-19/Belgium/GM-0323139/2020	EPI_ISL_420396	2020_03	29782	0
G	hCoV-19/Belgium/GMJ-0324132/2020	EPI_ISL_420389	2020_03	29782	0
G	hCoV-19/Belgium/GQL-0328309/2020	EPI_ISL_462163	2020_03	29782	0
G	hCoV-19/Belgium/HC-0408293/2020	EPI_ISL_464087	2020_04	29782	0
G	hCoV-19/Belgium/HI-0507421/2020	EPI_ISL_462275	2020_05	29782	0
G	hCoV-19/Belgium/HL-030771/2020	EPI_ISL_420327	2020_03	29782	0
G	hCoV-19/Belgium/HMM-0317327/2020	EPI_ISL_462181	2020_03	29782	0
G	hCoV-19/Belgium/HN-0317324/2020	EPI_ISL_462178	2020_03	29782	0
G	hCoV-19/Belgium/HP-0319108/2020	EPI_ISL_420364	2020_03	29782	0
G	hCoV-19/Belgium/ITM_C053/2020	EPI_ISL_434372	2020_03	29782	2
G	hCoV-19/Belgium/ITM_C067/2020	EPI_ISL_450725	2020_03	29769	0
G	hCoV-19/Belgium/ITM_C152/2020	EPI_ISL_450727	2020_03	29769	1
G	hCoV-19/Belgium/ITM_C161/2020	EPI_ISL_450728	2020_03	29769	0
G	hCoV-19/Belgium/ITM_C169/2020	EPI_ISL_450729	2020_03	29769	0
G	hCoV-19/Belgium/ITM_C189/2020	EPI_ISL_434366	2020_03	29782	220
G	hCoV-19/Belgium/ITM_C2184_2/2020	EPI_ISL_487432	2020_06	29769	0
G	hCoV-19/Belgium/ITM_C233/2020	EPI_ISL_434371	2020_04	29782	220
G	hCoV-19/Belgium/ITM_C237/2020	EPI_ISL_450732	2020_04	29769	0
G	hCoV-19/Belgium/ITM_C262/2020	EPI_ISL_434369	2020_04	29782	2
G	hCoV-19/Belgium/ITM_C305/2020	EPI_ISL_434370	2020_04	29782	220
G	hCoV-19/Belgium/ITM_C366/2020	EPI_ISL_434374	2020_04	29782	224
G	hCoV-19/Belgium/ITM_C413/2020	EPI_ISL_450737	2020_04	29769	0
G	hCoV-19/Belgium/ITM_C420/2020	EPI_ISL_434383	2020_04	29782	220
G	hCoV-19/Belgium/ITM_C451/2020	EPI_ISL_434377	2020_04	29782	220
G	hCoV-19/Belgium/ITM_C511/2020	EPI_ISL_434384	2020_04	29782	220
G	hCoV-19/Belgium/JK-0305110/2020	EPI_ISL_420367	2020_03	29782	0
G	hCoV-19/Belgium/JRH-030459/2020	EPI_ISL_418988	2020_03	29782	74
G	hCoV-19/Belgium/KA-03042/2020	EPI_ISL_417424	2020_03	29817	0
G	hCoV-19/Belgium/KKN-0319184/2020	EPI_ISL_420366	2020_03	29782	0
G	hCoV-19/Belgium/LA-0403382/2020	EPI_ISL_462236	2020_04	29782	0
G	hCoV-19/Belgium/LC-0406278/2020	EPI_ISL_464072	2020_04	29782	0
G	hCoV-19/Belgium/LJ-0328310/2020	EPI_ISL_462164	2020_03	29782	0
G	hCoV-19/Belgium/LPDC-0323115/2020	EPI_ISL_420372	2020_03	29782	2
G	hCoV-19/Belgium/LPJ-0401364/2020	EPI_ISL_462218	2020_04	29782	0
G	hCoV-19/Belgium/LV-0324133/2020	EPI_ISL_420390	2020_03	29782	0
G	hCoV-19/Belgium/MA-0406273/2020	EPI_ISL_464067	2020_04	29782	0
G	hCoV-19/Belgium/MC-030689/2020	EPI_ISL_420345	2020_03	29782	0
G	hCoV-19/Belgium/MC-0323129/2020	EPI_ISL_420386	2020_03	29782	0
G	hCoV-19/Belgium/MG-0402383/2020	EPI_ISL_462237	2020_04	29782	0
G	hCoV-19/Belgium/MS-0324134/2020	EPI_ISL_420391	2020_03	29782	0
G	hCoV-19/Belgium/MSE-0324131/2020	EPI_ISL_420388	2020_03	29782	159
G	hCoV-19/Belgium/MT-0322411/2020	EPI_ISL_462265	2020_03	29782	0
G	hCoV-19/Belgium/NA-0323141/2020	EPI_ISL_420398	2020_03	29782	0
G	hCoV-19/Belgium/NKMA-0324172/2020	EPI_ISL_420429	2020_03	29782	0
G	hCoV-19/Belgium/NKR-030645/2020	EPI_ISL_418795	2020_03	29782	0
G	hCoV-19/Belgium/NML-0325127/2020	EPI_ISL_420384	2020_03	29782	0
G	hCoV-19/Belgium/OS-0325137/2020	EPI_ISL_420394	2020_03	29782	21
G	hCoV-19/Belgium/OT-0319109/2020	EPI_ISL_420365	2020_03	29782	0
G	hCoV-19/Belgium/PF-0326316/2020	EPI_ISL_462170	2020_03	29782	0
G	hCoV-19/Belgium/PJM-0325166/2020	EPI_ISL_420423	2020_03	29782	0
G	hCoV-19/Belgium/PM-0324144/2020	EPI_ISL_420401	2020_03	29782	22
G	hCoV-19/Belgium/PS-0408413/2020	EPI_ISL_462267	2020_04	29782	0
G	hCoV-19/Belgium/PY-0407405/2020	EPI_ISL_462259	2020_04	29782	0
G	hCoV-19/Belgium/QL-0324173/2020	EPI_ISL_420430	2020_03	29782	0
G	hCoV-19/Belgium/RA-030445/2020	EPI_ISL_420443	2020_03	29782	0
G	hCoV-19/Belgium/RD-0408292/2020	EPI_ISL_464086	2020_04	29782	0
G	hCoV-19/Belgium/RDC-030961/2020	EPI_ISL_420452	2020_03	29782	0
G	hCoV-19/Belgium/RHA-0324177/2020	EPI_ISL_420434	2020_03	29782	0
G	hCoV-19/Belgium/RM-0330304/2020	EPI_ISL_462158	2020_03	29782	0
G	hCoV-19/Belgium/RS-030257/2020	EPI_ISL_418986	2020_03	29782	64
G	hCoV-19/Belgium/RS-0324138/2020	EPI_ISL_420395	2020_03	29782	0
G	hCoV-19/Belgium/RT-03035/2020	EPI_ISL_417430	2020_03	29816	0
G	hCoV-19/Belgium/RT-030460/2020	EPI_ISL_418989	2020_03	29782	0
G	hCoV-19/Belgium/Rega-0319265/2020	EPI_ISL_458235	2020_03	29782	6
G	hCoV-19/Belgium/Rega-0320258/2020	EPI_ISL_458228	2020_03	29782	0
G	hCoV-19/Belgium/Rega-0326261/2020	EPI_ISL_458231	2020_03	29782	0
G	hCoV-19/Belgium/Rega-0327211/2020	EPI_ISL_458181	2020_03	29782	0
G	hCoV-19/Belgium/Rega-0327212/2020	EPI_ISL_458182	2020_03	29782	0
G	hCoV-19/Belgium/Rega-0327213/2020	EPI_ISL_458183	2020_03	29782	0
G	hCoV-19/Belgium/Rega-0327216/2020	EPI_ISL_458186	2020_03	29782	0
G	hCoV-19/Belgium/Rega-0328189/2020	EPI_ISL_458159	2020_03	29782	0
G	hCoV-19/Belgium/Rega-0328190/2020	EPI_ISL_458160	2020_03	29782	0
G	hCoV-19/Belgium/Rega-0328191/2020	EPI_ISL_458161	2020_03	29782	0
G	hCoV-19/Belgium/Rega-0328192/2020	EPI_ISL_458162	2020_03	29782	0
G	hCoV-19/Belgium/Rega-0328193/2020	EPI_ISL_458163	2020_03	29782	0
G	hCoV-19/Belgium/Rega-0328194/2020	EPI_ISL_458164	2020_03	29782	0
G	hCoV-19/Belgium/Rega-0328195/2020	EPI_ISL_458165	2020_03	29782	0
G	hCoV-19/Belgium/Rega-0328197/2020	EPI_ISL_458167	2020_03	29782	0
G	hCoV-19/Belgium/Rega-0328199/2020	EPI_ISL_458169	2020_03	29782	0
G	hCoV-19/Belgium/Rega-0328202/2020	EPI_ISL_458172	2020_03	29782	0
G	hCoV-19/Belgium/Rega-0328203/2020	EPI_ISL_458173	2020_03	29782	0
G	hCoV-19/Belgium/Rega-0328205/2020	EPI_ISL_458175	2020_03	29782	0
G	hCoV-19/Belgium/Rega-0328206/2020	EPI_ISL_458176	2020_03	29782	0
G	hCoV-19/Belgium/Rega-0328209/2020	EPI_ISL_458179	2020_03	29782	0
G	hCoV-19/Belgium/Rega-0329219/2020	EPI_ISL_458189	2020_03	29782	0
G	hCoV-19/Belgium/Rega-0329220/2020	EPI_ISL_458190	2020_03	29782	0
G	hCoV-19/Belgium/Rega-0329221/2020	EPI_ISL_458191	2020_03	29782	0
G	hCoV-19/Belgium/Rega-0329222/2020	EPI_ISL_458192	2020_03	29782	0
G	hCoV-19/Belgium/Rega-0329225/2020	EPI_ISL_458195	2020_03	29782	0
G	hCoV-19/Belgium/Rega-0329226/2020	EPI_ISL_458196	2020_03	29782	0
G	hCoV-19/Belgium/Rega-0329227/2020	EPI_ISL_458197	2020_03	29782	0
G	hCoV-19/Belgium/Rega-0329228/2020	EPI_ISL_458198	2020_03	29782	0
G	hCoV-19/Belgium/Rega-0329229/2020	EPI_ISL_458199	2020_03	29782	0
G	hCoV-19/Belgium/Rega-0329230/2020	EPI_ISL_458200	2020_03	29782	0
G	hCoV-19/Belgium/Rega-0329231/2020	EPI_ISL_458201	2020_03	29782	0
G	hCoV-19/Belgium/Rega-0329235/2020	EPI_ISL_458205	2020_03	29782	0
G	hCoV-19/Belgium/Rega-0329236/2020	EPI_ISL_458206	2020_03	29782	0
G	hCoV-19/Belgium/Rega-0329237/2020	EPI_ISL_458207	2020_03	29782	0
G	hCoV-19/Belgium/Rega-0329239/2020	EPI_ISL_458209	2020_03	29782	0
G	hCoV-19/Belgium/Rega-0329245/2020	EPI_ISL_458215	2020_03	29782	0
G	hCoV-19/Belgium/Rega-0330248/2020	EPI_ISL_458218	2020_03	29782	0
G	hCoV-19/Belgium/Rega-0330250/2020	EPI_ISL_458220	2020_03	29782	0
G	hCoV-19/Belgium/Rega-0330253/2020	EPI_ISL_458223	2020_03	29782	0
G	hCoV-19/Belgium/SA-0409296/2020	EPI_ISL_464090	2020_04	29782	0
G	hCoV-19/Belgium/SB-030990/2020	EPI_ISL_420346	2020_03	29782	17
G	hCoV-19/Belgium/SB-0407394/2020	EPI_ISL_462248	2020_04	29782	0
G	hCoV-19/Belgium/SC-0319113/2020	EPI_ISL_420370	2020_03	29782	2
G	hCoV-19/Belgium/SC-0325380/2020	EPI_ISL_462234	2020_03	29782	0
G	hCoV-19/Belgium/SG-0328314/2020	EPI_ISL_462168	2020_03	29782	0
G	hCoV-19/Belgium/SH-03014/2020	EPI_ISL_415156	2020_03	29782	0
G	hCoV-19/Belgium/SN-03031/2020	EPI_ISL_416469	2020_03	29782	0
G	hCoV-19/Belgium/SN-0331360/2020	EPI_ISL_462214	2020_03	29782	0
G	hCoV-19/Belgium/SS-031047/2020	EPI_ISL_418793	2020_03	29782	0
G	hCoV-19/Belgium/STM-0324170/2020	EPI_ISL_420427	2020_03	29782	0
G	hCoV-19/Belgium/TMG-0326391/2020	EPI_ISL_462245	2020_03	29782	0
G	hCoV-19/Belgium/UGent-100/2020	EPI_ISL_475060	2020_03	29782	0
G	hCoV-19/Belgium/UGent-102/2020	EPI_ISL_475062	2020_03	29782	0
G	hCoV-19/Belgium/UGent-105/2020	EPI_ISL_475065	2020_03	29782	218
G	hCoV-19/Belgium/UGent-107/2020	EPI_ISL_475067	2020_03	29782	0
G	hCoV-19/Belgium/UGent-110/2020	EPI_ISL_475070	2020_03	29782	0
G	hCoV-19/Belgium/UGent-111/2020	EPI_ISL_475071	2020_03	29782	59
G	hCoV-19/Belgium/UGent-117/2020	EPI_ISL_475077	2020_03	29782	0
G	hCoV-19/Belgium/UGent-119/2020	EPI_ISL_475079	2020_03	29782	218
G	hCoV-19/Belgium/UGent-121/2020	EPI_ISL_475081	2020_05	29782	218
G	hCoV-19/Belgium/UGent-122/2020	EPI_ISL_475082	2020_06	29782	0
G	hCoV-19/Belgium/UGent-129/2020	EPI_ISL_481225	2020_04	29782	0
G	hCoV-19/Belgium/UGent-13/2020	EPI_ISL_425055	2020_03	29782	0
G	hCoV-19/Belgium/UGent-133/2020	EPI_ISL_481227	2020_04	29782	0
G	hCoV-19/Belgium/UGent-2/2020	EPI_ISL_425050	2020_03	29782	0
G	hCoV-19/Belgium/UGent-22/2020	EPI_ISL_425062	2020_03	29782	0
G	hCoV-19/Belgium/UGent-24/2020	EPI_ISL_425063	2020_03	29782	0
G	hCoV-19/Belgium/UGent-25/2020	EPI_ISL_425064	2020_03	29782	0
G	hCoV-19/Belgium/UGent-34/2020	EPI_ISL_434352	2020_03	29782	0
G	hCoV-19/Belgium/UGent-37/2020	EPI_ISL_434355	2020_03	29782	0
G	hCoV-19/Belgium/UGent-40/2020	EPI_ISL_434357	2020_03	29782	0
G	hCoV-19/Belgium/UGent-45/2020	EPI_ISL_434361	2020_03	29782	0
G	hCoV-19/Belgium/UGent-57/2020	EPI_ISL_451168	2020_04	29782	0
G	hCoV-19/Belgium/UGent-59/2020	EPI_ISL_451170	2020_04	29782	0
G	hCoV-19/Belgium/UGent-66/2020	EPI_ISL_451177	2020_04	29782	0
G	hCoV-19/Belgium/UGent-68/2020	EPI_ISL_451179	2020_04	29782	0
G	hCoV-19/Belgium/UGent-69/2020	EPI_ISL_451180	2020_04	29782	0
G	hCoV-19/Belgium/UGent-70/2020	EPI_ISL_451181	2020_04	29782	0
G	hCoV-19/Belgium/UGent-79/2020	EPI_ISL_468729	2020_03	29782	218
G	hCoV-19/Belgium/UGent-83/2020	EPI_ISL_468732	2020_03	29782	0
G	hCoV-19/Belgium/UGent-88/2020	EPI_ISL_468736	2020_03	29782	0
G	hCoV-19/Belgium/UGent-91/2020	EPI_ISL_468739	2020_03	29782	0
G	hCoV-19/Belgium/UGent-92/2020	EPI_ISL_468740	2020_03	29782	0
G	hCoV-19/Belgium/UGent-95/2020	EPI_ISL_468743	2020_03	29782	0
G	hCoV-19/Belgium/UGent-97/2020	EPI_ISL_468745	2020_03	29782	0
G	hCoV-19/Belgium/UGent-98/2020	EPI_ISL_468746	2020_03	29782	0
G	hCoV-19/Belgium/ULG-0189/2020	EPI_ISL_447129	2020_03	29776	0
G	hCoV-19/Belgium/ULG-0536/2020	EPI_ISL_447133	2020_04	29773	0
G	hCoV-19/Belgium/ULG-10007/2020	EPI_ISL_421186	2020_03	29782	0
G	hCoV-19/Belgium/ULG-10008/2020	EPI_ISL_421187	2020_03	29782	0
G	hCoV-19/Belgium/ULG-10015/2020	EPI_ISL_421193	2020_03	29782	0
G	hCoV-19/Belgium/ULG-10030/2020	EPI_ISL_421204	2020_03	29782	0
G	hCoV-19/Belgium/ULG-10031/2020	EPI_ISL_421205	2020_03	29782	0
G	hCoV-19/Belgium/ULG-10033/2020	EPI_ISL_421207	2020_03	29782	0
G	hCoV-19/Belgium/ULG-10047/2020	EPI_ISL_421214	2020_03	29782	0
G	hCoV-19/Belgium/ULG-10049/2020	EPI_ISL_424658	2020_04	29782	0
G	hCoV-19/Belgium/ULG-10051/2020	EPI_ISL_424660	2020_03	29782	0
G	hCoV-19/Belgium/ULG-10055/2020	EPI_ISL_424652	2020_04	29782	0
G	hCoV-19/Belgium/ULG-10056/2020	EPI_ISL_424655	2020_04	29782	0
G	hCoV-19/Belgium/ULG-10058/2020	EPI_ISL_424653	2020_04	29782	0
G	hCoV-19/Belgium/ULG-10062/2020	EPI_ISL_424664	2020_04	29782	0
G	hCoV-19/Belgium/ULG-10069/2020	EPI_ISL_424633	2020_04	29782	0
G	hCoV-19/Belgium/ULG-10077/2020	EPI_ISL_424642	2020_04	29782	0
G	hCoV-19/Belgium/ULG-10081/2020	EPI_ISL_424640	2020_04	29782	0
G	hCoV-19/Belgium/ULG-10086/2020	EPI_ISL_424644	2020_04	29782	0
G	hCoV-19/Belgium/ULG-10092/2020	EPI_ISL_424647	2020_04	29782	0
G	hCoV-19/Belgium/ULG-10094/2020	EPI_ISL_424650	2020_03	29782	0
G	hCoV-19/Belgium/ULG-10099/2020	EPI_ISL_427350	2020_03	29782	0
G	hCoV-19/Belgium/ULG-10100/2020	EPI_ISL_427351	2020_04	29782	0
G	hCoV-19/Belgium/ULG-10107/2020	EPI_ISL_427358	2020_04	29782	0
G	hCoV-19/Belgium/ULG-10108/2020	EPI_ISL_427359	2020_03	29782	0
G	hCoV-19/Belgium/ULG-10115/2020	EPI_ISL_427364	2020_04	29782	1
G	hCoV-19/Belgium/ULG-10118/2020	EPI_ISL_427366	2020_04	29782	1
G	hCoV-19/Belgium/ULG-10122/2020	EPI_ISL_427370	2020_03	29782	0
G	hCoV-19/Belgium/ULG-10124/2020	EPI_ISL_427371	2020_04	29782	1
G	hCoV-19/Belgium/ULG-10134/2020	EPI_ISL_427379	2020_04	29782	0
G	hCoV-19/Belgium/ULG-10142/2020	EPI_ISL_427385	2020_04	29782	1
G	hCoV-19/Belgium/ULG-10152/2020	EPI_ISL_447140	2020_04	29782	0
G	hCoV-19/Belgium/ULG-10156/2020	EPI_ISL_447152	2020_04	29782	0
G	hCoV-19/Belgium/ULG-10177/2020	EPI_ISL_455965	2020_04	29782	0
G	hCoV-19/Belgium/ULG-10178/2020	EPI_ISL_455966	2020_05	29782	0
G	hCoV-19/Belgium/ULG-10185/2020	EPI_ISL_455973	2020_05	29782	0
G	hCoV-19/Belgium/ULG-10188/2020	EPI_ISL_455976	2020_04	29782	0
G	hCoV-19/Belgium/ULG-10189/2020	EPI_ISL_455977	2020_05	29782	0
G	hCoV-19/Belgium/ULG-10190/2020	EPI_ISL_455978	2020_05	29782	0
G	hCoV-19/Belgium/ULG-10192/2020	EPI_ISL_471427	2020_04	29782	0
G	hCoV-19/Belgium/ULG-10195/2020	EPI_ISL_471430	2020_05	29782	0
G	hCoV-19/Belgium/ULG-10196/2020	EPI_ISL_471431	2020_05	29782	0
G	hCoV-19/Belgium/ULG-10202/2020	EPI_ISL_471436	2020_05	29782	32
G	hCoV-19/Belgium/ULG-10208/2020	EPI_ISL_484697	2020_05	29782	0
G	hCoV-19/Belgium/ULG-10215/2020	EPI_ISL_484703	2020_04	29782	0
G	hCoV-19/Belgium/ULG-10233/2020	EPI_ISL_498139	2020_05	29782	1
G	hCoV-19/Belgium/ULG-10249/2020	EPI_ISL_515056	2020_07	29782	0
G	hCoV-19/Belgium/ULG-10261/2020	EPI_ISL_515068	2020_07	29782	0
G	hCoV-19/Belgium/ULG-10273/2020	EPI_ISL_515080	2020_07	29782	0
G	hCoV-19/Belgium/ULG-4163/2020	EPI_ISL_417013	2020_03	29782	220
G	hCoV-19/Belgium/ULG-6503/2020	EPI_ISL_417016	2020_03	29782	1
G	hCoV-19/Belgium/ULG-6754/2020	EPI_ISL_417019	2020_03	29782	0
G	hCoV-19/Belgium/ULG-6839/2020	EPI_ISL_447120	2020_03	29782	0
G	hCoV-19/Belgium/ULG-6972/2020	EPI_ISL_418624	2020_04	29782	0
G	hCoV-19/Belgium/ULG-7134/2020	EPI_ISL_418628	2020_03	29782	14
G	hCoV-19/Belgium/ULG-7500/2020	EPI_ISL_418632	2020_03	29782	0
G	hCoV-19/Belgium/ULG-7729/2020	EPI_ISL_418630	2020_03	29782	0
G	hCoV-19/Belgium/ULG-7773/2020	EPI_ISL_418629	2020_03	29782	2
G	hCoV-19/Belgium/ULG-7921/2020	EPI_ISL_447136	2020_03	29782	0
G	hCoV-19/Belgium/ULG-8532/2020	EPI_ISL_418635	2020_03	29782	0
G	hCoV-19/Belgium/ULG-8595/2020	EPI_ISL_418634	2020_03	29782	0
G	hCoV-19/Belgium/ULG-8634/2020	EPI_ISL_418640	2020_03	29782	2
G	hCoV-19/Belgium/ULG-8937/2020	EPI_ISL_447122	2020_03	29782	0
G	hCoV-19/Belgium/ULG-9535/2020	EPI_ISL_447123	2020_03	29782	0
G	hCoV-19/Belgium/ULG-9536/2020	EPI_ISL_447124	2020_03	29782	0
G	hCoV-19/Belgium/ULG-9558/2020	EPI_ISL_418645	2020_03	29782	0
G	hCoV-19/Belgium/ULG-9618/2020	EPI_ISL_418648	2020_03	29782	1
G	hCoV-19/Belgium/ULG-9619/2020	EPI_ISL_418649	2020_03	29782	26
G	hCoV-19/Belgium/ULG-9647/2020	EPI_ISL_418653	2020_04	29782	0
G	hCoV-19/Belgium/ULG-9715/2020	EPI_ISL_418656	2020_03	29782	6
G	hCoV-19/Belgium/ULG-9716/2020	EPI_ISL_418657	2020_03	29782	0
G	hCoV-19/Belgium/ULG-9725/2020	EPI_ISL_418659	2020_03	29782	7
G	hCoV-19/Belgium/ULG-9739/2020	EPI_ISL_418663	2020_03	29782	0
G	hCoV-19/Belgium/UM-0318103/2020	EPI_ISL_420359	2020_03	29782	0
G	hCoV-19/Belgium/UNJP-0324125/2020	EPI_ISL_420382	2020_03	29782	0
G	hCoV-19/Belgium/VAG-03013/2020	EPI_ISL_415155	2020_03	29782	0
G	hCoV-19/Belgium/VAM-0506416/2020	EPI_ISL_462270	2020_05	29782	0
G	hCoV-19/Belgium/VBMJ-0401430/2020	EPI_ISL_462225	2020_04	29782	0
G	hCoV-19/Belgium/VD-0318102/2020	EPI_ISL_420358	2020_03	29782	0
G	hCoV-19/Belgium/VDLH-030548-2/2020	EPI_ISL_418797	2020_03	29839	0
G	hCoV-19/Belgium/VDLH-030548/2020	EPI_ISL_418796	2020_03	29782	0
G	hCoV-19/Belgium/VHC-030655/2020	EPI_ISL_420449	2020_03	29782	41
G	hCoV-19/Belgium/VHRA-030644/2020	EPI_ISL_418794	2020_03	29782	0
G	hCoV-19/Belgium/VJB-0327317/2020	EPI_ISL_462171	2020_03	29782	0
G	hCoV-19/Belgium/VL-0318104/2020	EPI_ISL_420360	2020_03	29782	0
G	hCoV-19/Belgium/VLM-03011/2020	EPI_ISL_415153	2020_03	29782	0
G	hCoV-19/Belgium/VMC-0325337/2020	EPI_ISL_462191	2020_03	29782	0
G	hCoV-19/Belgium/VNM-0406400/2020	EPI_ISL_462254	2020_04	29782	0
G	hCoV-19/Belgium/VNP-0320107/2020	EPI_ISL_420363	2020_03	29782	0
G	hCoV-19/Belgium/VPP-0331379/2020	EPI_ISL_462233	2020_03	29782	0
G	hCoV-19/Belgium/VRAR-030643/2020	EPI_ISL_418981	2020_03	29782	0
G	hCoV-19/Belgium/VRMJ-0401372/2020	EPI_ISL_462226	2020_04	29782	0
G	hCoV-19/Belgium/WCV-0408399/2020	EPI_ISL_462253	2020_04	29782	1
G	hCoV-19/Belgium/ZF-0325152/2020	EPI_ISL_420409	2020_03	29782	0
G	hCoV-19/Belgium/rega-0403290/2020	EPI_ISL_464084	2020_04	29782	0
G	hCoV-19/Belgium/rega-0405288/2020	EPI_ISL_464082	2020_04	29782	0
G	hCoV-19/Belgium/rega-0407282/2020	EPI_ISL_464076	2020_04	29782	0
G	hCoV-19/Belgium/rega-0407283/2020	EPI_ISL_464077	2020_04	29782	0
G	hCoV-19/Belgium/rega-0407287/2020	EPI_ISL_464081	2020_04	29782	0
G	hCoV-19/Belgium/rega-0409435/2020	EPI_ISL_476944	2020_04	29782	0
G	hCoV-19/Belgium/rega-0411441/2020	EPI_ISL_476951	2020_04	29782	0
G	hCoV-19/Belgium/rega-0411442/2020	EPI_ISL_476952	2020_04	29782	0
G	hCoV-19/Belgium/rega-0411446/2020	EPI_ISL_476956	2020_04	29782	0
G	hCoV-19/Belgium/rega-0411450/2020	EPI_ISL_476960	2020_04	29782	0
G	hCoV-19/Belgium/rega-0411451/2020	EPI_ISL_476961	2020_04	29782	0
G	hCoV-19/Belgium/rega-0411455/2020	EPI_ISL_476965	2020_04	29782	0
G	hCoV-19/Belgium/rega-0411464/2020	EPI_ISL_476974	2020_04	29782	0
G	hCoV-19/Belgium/rega-0411465/2020	EPI_ISL_476975	2020_04	29782	0
G	hCoV-19/Belgium/rega-0411470/2020	EPI_ISL_476980	2020_04	29782	0
G	hCoV-19/Belgium/rega-0414478/2020	EPI_ISL_476988	2020_04	29782	0
G	hCoV-19/Belgium/rega-0414479/2020	EPI_ISL_476989	2020_04	29782	0
G	hCoV-19/Belgium/rega-0421423/2020	EPI_ISL_476991	2020_04	29782	0
G	hCoV-19/Belgium/rega-0428425/2020	EPI_ISL_476993	2020_04	29782	0
G	hCoV-19/Belgium/rega-0428427/2020	EPI_ISL_476994	2020_04	29782	0
G	hCoV-19/Belgium/rega-0429426/2020	EPI_ISL_476995	2020_04	29782	0
G	hCoV-19/Belgium/rega-0502481/2020	EPI_ISL_476997	2020_05	29782	0
G	hCoV-19/Belgium/rega-0503483/2020	EPI_ISL_476999	2020_05	29782	0
G	hCoV-19/Belgium/rega-0505486/2020	EPI_ISL_477003	2020_05	29782	0
G	hCoV-19/Benin/1022/2020	EPI_ISL_476826	2020_03	29799	4
G	hCoV-19/Benin/197/2020	EPI_ISL_476822	2020_03	29804	6
G	hCoV-19/Bosnia and Herzegovina/04-Sarajevo/2020	EPI_ISL_467300	2020_04	29835	0
G	hCoV-19/Bosnia and Herzegovina/ChVir7343/2020	EPI_ISL_462451	2020_03	29857	0
G	hCoV-19/Bosnia and Herzegovina/ChVir7344/2020	EPI_ISL_462452	2020_03	29857	0
G	hCoV-19/Bosnia and Herzegovina/ChVir7346/2020	EPI_ISL_462453	2020_03	29859	0
G	hCoV-19/Bosnia and Herzegovina/ChVir7347/2020	EPI_ISL_462454	2020_03	29863	0
G	hCoV-19/Bosnia and Herzegovina/ChVir7348/2020	EPI_ISL_462455	2020_03	29853	0
G	hCoV-19/Bosnia and Herzegovina/ChVir7349/2020	EPI_ISL_462456	2020_03	29857	0
G	hCoV-19/Bosnia and Herzegovina/ChVir7350/2020	EPI_ISL_462457	2020_03	29857	0
G	hCoV-19/Bosnia and Herzegovina/ChVir7352/2020	EPI_ISL_462458	2020_03	29860	0
G	hCoV-19/Bosnia and Herzegovina/ChVir7353/2020	EPI_ISL_462459	2020_03	29842	0
G	hCoV-19/Bosnia and Herzegovina/ChVir7354/2020	EPI_ISL_462460	2020_03	29859	0
G	hCoV-19/Bosnia and Herzegovina/ChVir7357/2020	EPI_ISL_462462	2020_03	29856	0
G	hCoV-19/Bosnia and Herzegovina/ChVir7362/2020	EPI_ISL_462465	2020_03	29860	0
G	hCoV-19/Bosnia and Herzegovina/ChVir7365/2020	EPI_ISL_462467	2020_03	29852	0
G	hCoV-19/Bosnia and Herzegovina/ChVir7366/2020	EPI_ISL_462468	2020_03	29857	0
G	hCoV-19/Bosnia and Herzegovina/ChVir7367/2020	EPI_ISL_462469	2020_03	29859	0
G	hCoV-19/Bosnia and Herzegovina/ChVir7372/2020	EPI_ISL_462473	2020_03	29856	0
G	hCoV-19/Bosnia and Herzegovina/ChVir7375/2020	EPI_ISL_462474	2020_03	29857	0
G	hCoV-19/Bosnia and Herzegovina/ChVir7377/2020	EPI_ISL_462475	2020_03	29855	0
G	hCoV-19/Bosnia and Herzegovina/ChVir7382/2020	EPI_ISL_462472	2020_04	29857	0
G	hCoV-19/Bosnia and Herzegovina/ChVir7387/2020	EPI_ISL_462461	2020_04	29857	0
G	hCoV-19/Bosnia and Herzegovina/ChVir7396/2020	EPI_ISL_462466	2020_04	29856	0
G	hCoV-19/Brazil/CE-L16-CD344/2020	EPI_ISL_476288	2020_03	29782	293
G	hCoV-19/Brazil/CE-L16-CD346/2020	EPI_ISL_476289	2020_03	29782	296
G	hCoV-19/Brazil/MG-CV31/2020	EPI_ISL_429687	2020_03	29842	0
G	hCoV-19/Brazil/MG-CV42/2020	EPI_ISL_429695	2020_03	29664	7
G	hCoV-19/Brazil/MG-CV49/2020	EPI_ISL_429702	2020_03	29591	782
G	hCoV-19/Brazil/PA-IEC-166687/2020	EPI_ISL_524800	2020_05	29870	0
G	hCoV-19/Brazil/PB-IEC-161853/2020	EPI_ISL_524801	2020_03	29870	0
G	hCoV-19/Brazil/PE-AMU0036/2020	EPI_ISL_502779	2020_06	29834	151
G	hCoV-19/Brazil/PE-COV0260/2020	EPI_ISL_502875	2020_06	29834	185
G	hCoV-19/Brazil/RJ-2676/2020	EPI_ISL_467354	2020_04	29740	0
G	hCoV-19/Brazil/RJ-314/2020	EPI_ISL_414045	2020_03	29768	1
G	hCoV-19/Brazil/RJ-DCV05/2020	EPI_ISL_509430	2020_07	29844	0
G	hCoV-19/Brazil/RJ-DCV1/2020	EPI_ISL_509431	2020_07	29837	0
G	hCoV-19/Brazil/RJ-DCV3/2020	EPI_ISL_509432	2020_07	29838	0
G	hCoV-19/Brazil/RJ-DCV5/2020	EPI_ISL_509433	2020_07	29855	0
G	hCoV-19/Brazil/RJ-DCVN2/2020	EPI_ISL_529139	2020_07	29868	0
G	hCoV-19/Brazil/RJ-DCVN3/2020	EPI_ISL_529140	2020_07	29858	0
G	hCoV-19/Brazil/RJ-DCVN4/2020	EPI_ISL_510541	2020_07	29836	0
G	hCoV-19/Brazil/RJ-DCVN5/2020	EPI_ISL_510536	2020_07	29857	0
G	hCoV-19/Brazil/RJ-DCVTV507Q/2020	EPI_ISL_509435	2020_07	29853	0
G	hCoV-19/Brazil/RJ-INCA-C202/2020	EPI_ISL_513529	2020_04	29820	0
G	hCoV-19/Brazil/RO-04/2020	EPI_ISL_514134	2020_05	29775	0
G	hCoV-19/Brazil/RO-06/2020	EPI_ISL_514136	2020_05	29789	0
G	hCoV-19/Brazil/SP-01/2020	EPI_ISL_412964	2020_02	29870	0
G	hCoV-19/Brazil/SP-05/2020	EPI_ISL_414016	2020_02	29864	0
G	hCoV-19/Brazil/SP-06/2020	EPI_ISL_414015	2020_02	29866	0
G	hCoV-19/Brazil/SP-09/2020	EPI_ISL_416031	2020_03	29864	0
G	hCoV-19/Brazil/SP-131/2020	EPI_ISL_471543	2020_04	29840	0
G	hCoV-19/Brazil/SP-176/2020	EPI_ISL_523972	2020_04	29831	0
G	hCoV-19/Bucuresti/ChVir7244/2020	EPI_ISL_467778	2020_04	29856	0
G	hCoV-19/Bulgaria/17/2020	EPI_ISL_480300	2020_04	29829	0
G	hCoV-19/Bulgaria/36/2020	EPI_ISL_480307	2020_03	29856	0
G	hCoV-19/Bulgaria/40/2020	EPI_ISL_480309	2020_04	29856	0
G	hCoV-19/Bulgaria/41/2020	EPI_ISL_480310	2020_03	29804	0
G	hCoV-19/Canada/BC_00655815/2020	EPI_ISL_466698	2020_04	29782	0
G	hCoV-19/Canada/BC_00713032/2020	EPI_ISL_466700	2020_04	29782	0
G	hCoV-19/Canada/BC_00809458/2020	EPI_ISL_466702	2020_04	29782	0
G	hCoV-19/Canada/BC_01218976/2020	EPI_ISL_466704	2020_04	29782	0
G	hCoV-19/Canada/BC_01222955/2020	EPI_ISL_466705	2020_04	29782	2
G	hCoV-19/Canada/BC_01254071/2020	EPI_ISL_466706	2020_04	29782	0
G	hCoV-19/Canada/BC_01468719/2020	EPI_ISL_466709	2020_04	29782	0
G	hCoV-19/Canada/BC_02018462/2020	EPI_ISL_477087	2020_03	29782	280
G	hCoV-19/Canada/BC_02045287/2020	EPI_ISL_466712	2020_04	29782	0
G	hCoV-19/Canada/BC_02083468/2020	EPI_ISL_466715	2020_04	29782	0
G	hCoV-19/Canada/BC_02168448/2020	EPI_ISL_466717	2020_04	29782	0
G	hCoV-19/Canada/BC_02169597/2020	EPI_ISL_466718	2020_04	29782	0
G	hCoV-19/Canada/BC_02185653/2020	EPI_ISL_466719	2020_04	29782	0
G	hCoV-19/Canada/BC_02415563/2020	EPI_ISL_466721	2020_04	29782	0
G	hCoV-19/Canada/BC_02472119/2020	EPI_ISL_466722	2020_04	29782	1
G	hCoV-19/Canada/BC_02502338/2020	EPI_ISL_466723	2020_04	29782	0
G	hCoV-19/Canada/BC_02811162/2020	EPI_ISL_466729	2020_04	29782	0
G	hCoV-19/Canada/BC_02820264/2020	EPI_ISL_466730	2020_04	29782	0
G	hCoV-19/Canada/BC_02822314/2020	EPI_ISL_466731	2020_04	29782	1
G	hCoV-19/Canada/BC_02887476/2020	EPI_ISL_466732	2020_04	29782	0
G	hCoV-19/Canada/BC_02888326/2020	EPI_ISL_466733	2020_04	29782	0
G	hCoV-19/Canada/BC_03055797/2020	EPI_ISL_466734	2020_04	29782	278
G	hCoV-19/Canada/BC_03120111/2020	EPI_ISL_466736	2020_04	29782	1
G	hCoV-19/Canada/BC_03385157/2020	EPI_ISL_466737	2020_04	29782	0
G	hCoV-19/Canada/BC_03405412/2020	EPI_ISL_466739	2020_04	29782	0
G	hCoV-19/Canada/BC_03423088/2020	EPI_ISL_466740	2020_04	29782	0
G	hCoV-19/Canada/BC_03452391/2020	EPI_ISL_466741	2020_04	29782	0
G	hCoV-19/Canada/BC_03489456/2020	EPI_ISL_466752	2020_04	29782	0
G	hCoV-19/Canada/BC_03489776/2020	EPI_ISL_466753	2020_04	29782	0
G	hCoV-19/Canada/BC_03493786/2020	EPI_ISL_466754	2020_04	29782	0
G	hCoV-19/Canada/BC_03914944/2020	EPI_ISL_466756	2020_04	29782	0
G	hCoV-19/Canada/BC_03917951/2020	EPI_ISL_466757	2020_04	29782	0
G	hCoV-19/Canada/BC_03959087/2020	EPI_ISL_466758	2020_04	29782	0
G	hCoV-19/Canada/BC_03998412/2020	EPI_ISL_477091	2020_04	29782	0
G	hCoV-19/Canada/BC_04286257/2020	EPI_ISL_466765	2020_04	29782	0
G	hCoV-19/Canada/BC_04346268/2020	EPI_ISL_466766	2020_04	29782	0
G	hCoV-19/Canada/BC_04709878/2020	EPI_ISL_477051	2020_05	29782	0
G	hCoV-19/Canada/BC_04710049/2020	EPI_ISL_477052	2020_05	29782	0
G	hCoV-19/Canada/BC_04806249/2020	EPI_ISL_477054	2020_05	29782	0
G	hCoV-19/Canada/BC_04865055/2020	EPI_ISL_477057	2020_05	29782	0
G	hCoV-19/Canada/BC_04975041/2020	EPI_ISL_466774	2020_04	29782	0
G	hCoV-19/Canada/BC_05017368/2020	EPI_ISL_466775	2020_04	29782	0
G	hCoV-19/Canada/BC_05256838/2020	EPI_ISL_466784	2020_04	29782	0
G	hCoV-19/Canada/BC_05294838/2020	EPI_ISL_466785	2020_04	29782	0
G	hCoV-19/Canada/BC_05333597/2020	EPI_ISL_466788	2020_04	29782	0
G	hCoV-19/Canada/BC_06074915/2020	EPI_ISL_477058	2020_05	29782	0
G	hCoV-19/Canada/BC_06803213/2020	EPI_ISL_466806	2020_04	29782	255
G	hCoV-19/Canada/BC_06975953/2020	EPI_ISL_466811	2020_04	29782	0
G	hCoV-19/Canada/BC_07229190/2020	EPI_ISL_466814	2020_04	29782	255
G	hCoV-19/Canada/BC_07812071/2020	EPI_ISL_466821	2020_04	29782	255
G	hCoV-19/Canada/BC_08164457/2020	EPI_ISL_477062	2020_05	29782	0
G	hCoV-19/Canada/BC_08847088/2020	EPI_ISL_466834	2020_04	29782	255
G	hCoV-19/Canada/BC_09273580/2020	EPI_ISL_477070	2020_05	29782	0
G	hCoV-19/Canada/BC_09329927/2020	EPI_ISL_467305	2020_04	29782	0
G	hCoV-19/Canada/BC_09625012/2020	EPI_ISL_477071	2020_05	29782	0
G	hCoV-19/Canada/BC_10420892/2020	EPI_ISL_477080	2020_03	29782	0
G	hCoV-19/Canada/BC_11028219/2020	EPI_ISL_467317	2020_04	29782	0
G	hCoV-19/Canada/BC_11637543/2020	EPI_ISL_467324	2020_04	29782	0
G	hCoV-19/Canada/BC_11656063/2020	EPI_ISL_467327	2020_04	29782	0
G	hCoV-19/Canada/BC_12186719/2020	EPI_ISL_467330	2020_04	29782	0
G	hCoV-19/Canada/BC_12210980/2020	EPI_ISL_467332	2020_04	29782	0
G	hCoV-19/Canada/BC_12793935/2020	EPI_ISL_467338	2020_04	29782	0
G	hCoV-19/Canada/BC_13086747/2020	EPI_ISL_467339	2020_04	29782	0
G	hCoV-19/Canada/BC_13929277/2020	EPI_ISL_477081	2020_03	29782	0
G	hCoV-19/Canada/BC_14667611/2020	EPI_ISL_468658	2020_04	29782	0
G	hCoV-19/Canada/BC_15188754/2020	EPI_ISL_468662	2020_04	29782	278
G	hCoV-19/Canada/BC_15918444/2020	EPI_ISL_468678	2020_04	29782	0
G	hCoV-19/Canada/BC_16537755/2020	EPI_ISL_468680	2020_04	29782	0
G	hCoV-19/Canada/BC_16976214/2020	EPI_ISL_468687	2020_04	29782	0
G	hCoV-19/Canada/BC_17754491/2020	EPI_ISL_468691	2020_04	29782	0
G	hCoV-19/Canada/BC_17943129/2020	EPI_ISL_468694	2020_04	29782	0
G	hCoV-19/Canada/BC_18547866/2020	EPI_ISL_462759	2020_03	29782	0
G	hCoV-19/Canada/BC_18969070/2020	EPI_ISL_462760	2020_03	29782	0
G	hCoV-19/Canada/BC_19071912/2020	EPI_ISL_469213	2020_04	29782	0
G	hCoV-19/Canada/BC_19072819/2020	EPI_ISL_469215	2020_04	29782	0
G	hCoV-19/Canada/BC_19072825/2020	EPI_ISL_469214	2020_04	29782	0
G	hCoV-19/Canada/BC_19518330/2020	EPI_ISL_462765	2020_03	29782	0
G	hCoV-19/Canada/BC_19703911/2020	EPI_ISL_462767	2020_03	29782	0
G	hCoV-19/Canada/BC_19785113/2020	EPI_ISL_462769	2020_03	29782	0
G	hCoV-19/Canada/BC_19909443/2020	EPI_ISL_477020	2020_04	29782	0
G	hCoV-19/Canada/BC_19909482/2020	EPI_ISL_477021	2020_04	29782	278
G	hCoV-19/Canada/BC_20332712/2020	EPI_ISL_462771	2020_03	29782	0
G	hCoV-19/Canada/BC_20363111/2020	EPI_ISL_462772	2020_03	29782	0
G	hCoV-19/Canada/BC_20534610/2020	EPI_ISL_462776	2020_03	29782	0
G	hCoV-19/Canada/BC_20639310/2020	EPI_ISL_462777	2020_03	29782	0
G	hCoV-19/Canada/BC_20693717/2020	EPI_ISL_462778	2020_03	29782	0
G	hCoV-19/Canada/BC_20722019/2020	EPI_ISL_462779	2020_03	29782	0
G	hCoV-19/Canada/BC_20730616/2020	EPI_ISL_462780	2020_03	29782	0
G	hCoV-19/Canada/BC_20847524/2020	EPI_ISL_462782	2020_03	29782	0
G	hCoV-19/Canada/BC_20855313/2020	EPI_ISL_462783	2020_03	29782	0
G	hCoV-19/Canada/BC_21085515/2020	EPI_ISL_462789	2020_03	29782	0
G	hCoV-19/Canada/BC_21105219/2020	EPI_ISL_462790	2020_03	29782	0
G	hCoV-19/Canada/BC_21317517/2020	EPI_ISL_462805	2020_03	29782	0
G	hCoV-19/Canada/BC_21333019/2020	EPI_ISL_462806	2020_03	29782	0
G	hCoV-19/Canada/BC_21350918/2020	EPI_ISL_462808	2020_03	29782	0
G	hCoV-19/Canada/BC_21385821/2020	EPI_ISL_462810	2020_03	29782	0
G	hCoV-19/Canada/BC_21426715/2020	EPI_ISL_462812	2020_03	29782	0
G	hCoV-19/Canada/BC_21462515/2020	EPI_ISL_462815	2020_03	29782	0
G	hCoV-19/Canada/BC_21466919/2020	EPI_ISL_462816	2020_03	29782	0
G	hCoV-19/Canada/BC_21927217/2020	EPI_ISL_462819	2020_03	29782	0
G	hCoV-19/Canada/BC_21993212/2020	EPI_ISL_462820	2020_03	29782	0
G	hCoV-19/Canada/BC_22037912/2020	EPI_ISL_462822	2020_03	29782	0
G	hCoV-19/Canada/BC_22070527/2020	EPI_ISL_462824	2020_03	29782	0
G	hCoV-19/Canada/BC_22230811/2020	EPI_ISL_462827	2020_03	29782	0
G	hCoV-19/Canada/BC_22349316/2020	EPI_ISL_462829	2020_03	29782	0
G	hCoV-19/Canada/BC_22422949/2020	EPI_ISL_477031	2020_04	29782	0
G	hCoV-19/Canada/BC_22430814/2020	EPI_ISL_462830	2020_03	29782	0
G	hCoV-19/Canada/BC_22451513/2020	EPI_ISL_462831	2020_03	29782	0
G	hCoV-19/Canada/BC_22470913/2020	EPI_ISL_462833	2020_03	29782	0
G	hCoV-19/Canada/BC_22473210/2020	EPI_ISL_462834	2020_03	29782	0
G	hCoV-19/Canada/BC_22475116/2020	EPI_ISL_462835	2020_03	29782	0
G	hCoV-19/Canada/BC_23064916/2020	EPI_ISL_462840	2020_03	29782	0
G	hCoV-19/Canada/BC_23094312/2020	EPI_ISL_462841	2020_03	29782	0
G	hCoV-19/Canada/BC_23108423/2020	EPI_ISL_462843	2020_03	29782	0
G	hCoV-19/Canada/BC_23815516/2020	EPI_ISL_463187	2020_03	29782	0
G	hCoV-19/Canada/BC_24044059/2020	EPI_ISL_463191	2020_03	29782	0
G	hCoV-19/Canada/BC_24192775/2020	EPI_ISL_463196	2020_03	29782	0
G	hCoV-19/Canada/BC_24235415/2020	EPI_ISL_463203	2020_03	29782	0
G	hCoV-19/Canada/BC_24302962/2020	EPI_ISL_463210	2020_03	29782	0
G	hCoV-19/Canada/BC_24319756/2020	EPI_ISL_463211	2020_03	29782	0
G	hCoV-19/Canada/BC_24360831/2020	EPI_ISL_463214	2020_03	29782	0
G	hCoV-19/Canada/BC_25367465/2020	EPI_ISL_463220	2020_02	29782	0
G	hCoV-19/Canada/BC_25376719/2020	EPI_ISL_463221	2020_03	29782	0
G	hCoV-19/Canada/BC_25384316/2020	EPI_ISL_463222	2020_03	29782	0
G	hCoV-19/Canada/BC_25390851/2020	EPI_ISL_463223	2020_03	29782	0
G	hCoV-19/Canada/BC_25416870/2020	EPI_ISL_463224	2020_03	29782	0
G	hCoV-19/Canada/BC_25515215/2020	EPI_ISL_463225	2020_03	29782	0
G	hCoV-19/Canada/BC_25593681/2020	EPI_ISL_463227	2020_03	29494	0
G	hCoV-19/Canada/BC_26384651/2020	EPI_ISL_463232	2020_03	29782	0
G	hCoV-19/Canada/BC_26509737/2020	EPI_ISL_463235	2020_03	29782	0
G	hCoV-19/Canada/BC_26584470/2020	EPI_ISL_463237	2020_03	29782	0
G	hCoV-19/Canada/BC_26585549/2020	EPI_ISL_463238	2020_03	29782	0
G	hCoV-19/Canada/BC_26591461/2020	EPI_ISL_463241	2020_03	29782	0
G	hCoV-19/Canada/BC_26605771/2020	EPI_ISL_463243	2020_03	29782	0
G	hCoV-19/Canada/BC_26611727/2020	EPI_ISL_463244	2020_03	29782	0
G	hCoV-19/Canada/BC_26624482/2020	EPI_ISL_463245	2020_03	29782	0
G	hCoV-19/Canada/BC_26625053/2020	EPI_ISL_463246	2020_03	29782	0
G	hCoV-19/Canada/BC_26646523/2020	EPI_ISL_463248	2020_03	29782	0
G	hCoV-19/Canada/BC_26650347/2020	EPI_ISL_463250	2020_03	29782	0
G	hCoV-19/Canada/BC_26654155/2020	EPI_ISL_463251	2020_03	29782	0
G	hCoV-19/Canada/BC_26656159/2020	EPI_ISL_463252	2020_03	29782	0
G	hCoV-19/Canada/BC_26659043/2020	EPI_ISL_463253	2020_03	29782	0
G	hCoV-19/Canada/BC_26943931/2020	EPI_ISL_463255	2020_03	29494	0
G	hCoV-19/Canada/BC_26964094/2020	EPI_ISL_463256	2020_03	29782	0
G	hCoV-19/Canada/BC_27017413/2020	EPI_ISL_463258	2020_03	29782	0
G	hCoV-19/Canada/BC_27180562/2020	EPI_ISL_463261	2020_03	29782	0
G	hCoV-19/Canada/BC_27280641/2020	EPI_ISL_463265	2020_03	29782	0
G	hCoV-19/Canada/BC_27280776/2020	EPI_ISL_463266	2020_03	29782	0
G	hCoV-19/Canada/BC_27283916/2020	EPI_ISL_463267	2020_03	29782	0
G	hCoV-19/Canada/BC_27298990/2020	EPI_ISL_463270	2020_03	29782	0
G	hCoV-19/Canada/BC_27302671/2020	EPI_ISL_463271	2020_03	29782	0
G	hCoV-19/Canada/BC_27304064/2020	EPI_ISL_463274	2020_03	29782	0
G	hCoV-19/Canada/BC_27304554/2020	EPI_ISL_463275	2020_03	29782	0
G	hCoV-19/Canada/BC_27305318/2020	EPI_ISL_463276	2020_03	29782	0
G	hCoV-19/Canada/BC_5522039/2020	EPI_ISL_418834	2020_03	29782	0
G	hCoV-19/Canada/BC_6489864/2020	EPI_ISL_418839	2020_03	29782	0
G	hCoV-19/Canada/BC_6997898/2020	EPI_ISL_418842	2020_03	29782	0
G	hCoV-19/Canada/BC_7493713/2020	EPI_ISL_418844	2020_03	29782	279
G	hCoV-19/Canada/BC_7553799/2020	EPI_ISL_418846	2020_03	29782	0
G	hCoV-19/Canada/BC_8486790/2020	EPI_ISL_418849	2020_03	29782	0
G	hCoV-19/Canada/BC_9345042/2020	EPI_ISL_418856	2020_03	29782	0
G	hCoV-19/Canada/BC_9345715/2020	EPI_ISL_418857	2020_03	29782	0
G	hCoV-19/Canada/LTRI-18/2020	EPI_ISL_494970	2020_03	29857	0
G	hCoV-19/Canada/MB_75/2020	EPI_ISL_482480	2020_03	29735	0
G	hCoV-19/Canada/MB_76/2020	EPI_ISL_482481	2020_03	29735	0
G	hCoV-19/Canada/MB_78/2020	EPI_ISL_482482	2020_03	29735	0
G	hCoV-19/Canada/NB-206/2020	EPI_ISL_479627	2020_03	29735	0
G	hCoV-19/Canada/NB-214/2020	EPI_ISL_479630	2020_03	29735	0
G	hCoV-19/Canada/NB-215/2020	EPI_ISL_479631	2020_03	29735	0
G	hCoV-19/Canada/NB-216/2020	EPI_ISL_479632	2020_03	29735	0
G	hCoV-19/Canada/NB-218/2020	EPI_ISL_479634	2020_03	29735	0
G	hCoV-19/Canada/NB-228/2020	EPI_ISL_479643	2020_03	29735	0
G	hCoV-19/Canada/NB-231/2020	EPI_ISL_479644	2020_03	29735	0
G	hCoV-19/Canada/NB_1/2020	EPI_ISL_429806	2020_03	29782	0
G	hCoV-19/Canada/NB_21/2020	EPI_ISL_429811	2020_03	29782	0
G	hCoV-19/Canada/NB_243/2020	EPI_ISL_481742	2020_03	29735	0
G	hCoV-19/Canada/NB_263/2020	EPI_ISL_481753	2020_04	29735	0
G	hCoV-19/Canada/NB_270/2020	EPI_ISL_481755	2020_04	29735	0
G	hCoV-19/Canada/NB_274/2020	EPI_ISL_481757	2020_04	29735	0
G	hCoV-19/Canada/NB_35/2020	EPI_ISL_429816	2020_03	29782	0
G	hCoV-19/Canada/NB_56/2020	EPI_ISL_482473	2020_03	29735	0
G	hCoV-19/Canada/NB_6/2020	EPI_ISL_418811	2020_03	29782	0
G	hCoV-19/Canada/NL_95/2020	EPI_ISL_469234	2020_03	29735	0
G	hCoV-19/Canada/NL_97/2020	EPI_ISL_469236	2020_03	29735	0
G	hCoV-19/Canada/ON-OICR-SLB2796/2020	EPI_ISL_538328	2020_03	29813	0
G	hCoV-19/Canada/ON-OICR-SLB2797/2020	EPI_ISL_538329	2020_03	29842	0
G	hCoV-19/Canada/ON-OICR-SLB2844/2020	EPI_ISL_538365	2020_04	29815	0
G	hCoV-19/Canada/ON-QGLO-019/2020	EPI_ISL_459877	2020_03	29867	160
G	hCoV-19/Canada/ON-UHTC_0047/2020	EPI_ISL_464012	2020_04	29782	0
G	hCoV-19/Canada/ON-UHTC_0076/2020	EPI_ISL_464019	2020_04	29782	1
G	hCoV-19/Canada/ON_MU-S13/2020	EPI_ISL_463971	2020_03	29817	0
G	hCoV-19/Canada/ON_MU-S218/2020	EPI_ISL_463974	2020_03	29625	0
G	hCoV-19/Canada/ON_MU-S26/2020	EPI_ISL_463975	2020_03	29815	0
G	hCoV-19/Canada/ON_MU-S306/2020	EPI_ISL_463979	2020_03	29813	0
G	hCoV-19/Canada/ON_MU-S312/2020	EPI_ISL_463980	2020_03	29816	0
G	hCoV-19/Canada/ON_MU-S40/2020	EPI_ISL_463984	2020_03	29817	1
G	hCoV-19/Canada/ON_MU-S53/2020	EPI_ISL_463990	2020_03	29637	1
G	hCoV-19/Canada/ON_PHL0976/2020	EPI_ISL_418378	2020_03	29769	118
G	hCoV-19/Canada/ON_PHL4088/2020	EPI_ISL_418354	2020_03	29869	0
G	hCoV-19/Canada/ON_PHLU8150/2020	EPI_ISL_418355	2020_03	29869	0
G	hCoV-19/Canada/ON_QGLO-010/2020	EPI_ISL_459869	2020_03	29835	15
G	hCoV-19/Canada/QC-AJ7/2020	EPI_ISL_450639	2020_04	29782	295
G	hCoV-19/Canada/QC-LSPQ-L00212401/2020	EPI_ISL_535717	2020_03	29782	2
G	hCoV-19/Canada/QC-LSPQ-L00213981/2020	EPI_ISL_535722	2020_03	29837	202
G	hCoV-19/Canada/QC-LSPQ-L00214237/2020	EPI_ISL_535726	2020_03	29855	229
G	hCoV-19/Canada/QC-LSPQ-L00215022/2020	EPI_ISL_535731	2020_03	29782	2
G	hCoV-19/Canada/QC-LSPQ-L00215711/2020	EPI_ISL_535735	2020_03	29782	3
G	hCoV-19/Canada/QC-LSPQ-L00215812/2020	EPI_ISL_535738	2020_03	29773	2
G	hCoV-19/Canada/QC-LSPQ-L00215858/2020	EPI_ISL_535740	2020_03	29782	2
G	hCoV-19/Canada/QC-LSPQ-L00216432/2020	EPI_ISL_535748	2020_03	29847	230
G	hCoV-19/Canada/QC-LSPQ-L00217574/2020	EPI_ISL_535765	2020_03	29782	2
G	hCoV-19/Canada/QC-LSPQ-L00217831/2020	EPI_ISL_535767	2020_03	29782	5
G	hCoV-19/Canada/QC-LSPQ-L00217833/2020	EPI_ISL_535768	2020_03	29782	2
G	hCoV-19/Canada/QC-LSPQ-L00218308/2020	EPI_ISL_535774	2020_03	29782	4
G	hCoV-19/Canada/QC-LSPQ-L00218472/2020	EPI_ISL_535781	2020_03	29782	3
G	hCoV-19/Canada/QC-LSPQ-L00218475/2020	EPI_ISL_535782	2020_03	29837	52
G	hCoV-19/Canada/QC-LSPQ-L00219335/2020	EPI_ISL_535791	2020_03	29837	93
G	hCoV-19/Canada/QC-LSPQ-L00219533/2020	EPI_ISL_535793	2020_03	29782	95
G	hCoV-19/Canada/QC-LSPQ-L00220546/2020	EPI_ISL_535799	2020_03	29782	3
G	hCoV-19/Canada/QC-LSPQ-L00220634/2020	EPI_ISL_535800	2020_03	29782	2
G	hCoV-19/Canada/QC-LSPQ-L00220733/2020	EPI_ISL_535801	2020_03	29782	2
G	hCoV-19/Canada/QC-LSPQ-L00220736/2020	EPI_ISL_535802	2020_03	29782	2
G	hCoV-19/Canada/QC-LSPQ-L00220897/2020	EPI_ISL_535805	2020_03	29779	2
G	hCoV-19/Canada/QC-LSPQ-L00220933/2020	EPI_ISL_535806	2020_03	29820	0
G	hCoV-19/Canada/QC-LSPQ-L00221391/2020	EPI_ISL_535808	2020_03	29782	2
G	hCoV-19/Canada/QC-LSPQ-L00224812/2020	EPI_ISL_535824	2020_03	29782	2
G	hCoV-19/Canada/QC-LSPQ-L00225045/2020	EPI_ISL_535828	2020_03	29782	2
G	hCoV-19/Canada/QC-LSPQ-L00225808/2020	EPI_ISL_535838	2020_03	29782	4
G	hCoV-19/Canada/QC-LSPQ-L00225894/2020	EPI_ISL_535839	2020_03	29782	2
G	hCoV-19/Canada/QC-LSPQ-L00226858/2020	EPI_ISL_535851	2020_03	29782	2
G	hCoV-19/Canada/QC-LSPQ-L00227658/2020	EPI_ISL_535865	2020_03	29782	4
G	hCoV-19/Canada/QC-LSPQ-L00227663/2020	EPI_ISL_535866	2020_03	29782	2
G	hCoV-19/Canada/QC-LSPQ-L00227996/2020	EPI_ISL_535869	2020_03	29837	0
G	hCoV-19/Canada/QC-LSPQ-L00228636/2020	EPI_ISL_535874	2020_03	29838	1
G	hCoV-19/Canada/QC-LSPQ-L00228687/2020	EPI_ISL_535875	2020_03	29837	0
G	hCoV-19/Canada/QC-LSPQ-L00229363/2020	EPI_ISL_535891	2020_03	29839	24
G	hCoV-19/Canada/QC-LSPQ-L00229671/2020	EPI_ISL_535899	2020_03	29782	2
G	hCoV-19/Canada/QC-LSPQ-L00229727/2020	EPI_ISL_535901	2020_03	29837	0
G	hCoV-19/Canada/QC-LSPQ-L00229794/2020	EPI_ISL_535903	2020_03	29782	2
G	hCoV-19/Canada/QC-LSPQ-L00229796/2020	EPI_ISL_535904	2020_03	29782	0
G	hCoV-19/Canada/QC-LSPQ-L00229929/2020	EPI_ISL_535905	2020_03	29782	2
G	hCoV-19/Canada/QC-LSPQ-L00230189/2020	EPI_ISL_535912	2020_03	29782	5
G	hCoV-19/Canada/QC-LSPQ-L00230315/2020	EPI_ISL_535914	2020_03	29782	2
G	hCoV-19/Canada/QC-LSPQ-L00230319/2020	EPI_ISL_535915	2020_03	29782	2
G	hCoV-19/Canada/QC-LSPQ-L00230473/2020	EPI_ISL_535920	2020_03	29782	2
G	hCoV-19/Canada/QC-LSPQ-L00230637/2020	EPI_ISL_535925	2020_03	29836	37
G	hCoV-19/Canada/QC-LSPQ-L00230647/2020	EPI_ISL_535926	2020_03	29782	2
G	hCoV-19/Canada/QC-LSPQ-L00230666/2020	EPI_ISL_535927	2020_03	29782	2
G	hCoV-19/Canada/QC-LSPQ-L00230882/2020	EPI_ISL_535937	2020_03	29782	2
G	hCoV-19/Canada/QC-LSPQ-L00230948/2020	EPI_ISL_535940	2020_03	29837	19
G	hCoV-19/Canada/QC-LSPQ-L00231156/2020	EPI_ISL_535945	2020_03	29782	2
G	hCoV-19/Canada/QC-LSPQ-L00231230/2020	EPI_ISL_535947	2020_03	29782	2
G	hCoV-19/Canada/QC-LSPQ-L00231415/2020	EPI_ISL_535954	2020_03	29837	1
G	hCoV-19/Canada/QC-LSPQ-L00231634/2020	EPI_ISL_535959	2020_03	29782	2
G	hCoV-19/Canada/QC-LSPQ-L00231779/2020	EPI_ISL_535962	2020_03	29782	2
G	hCoV-19/Canada/QC-LSPQ-L00231805/2020	EPI_ISL_535963	2020_03	29837	0
G	hCoV-19/Canada/QC-LSPQ-L00231966/2020	EPI_ISL_535967	2020_03	29837	0
G	hCoV-19/Canada/QC-LSPQ-L00232004/2020	EPI_ISL_535969	2020_03	29837	0
G	hCoV-19/Canada/QC-LSPQ-L00232070/2020	EPI_ISL_535972	2020_03	29782	2
G	hCoV-19/Canada/QC-LSPQ-L00232073/2020	EPI_ISL_535973	2020_03	29782	2
G	hCoV-19/Canada/QC-LSPQ-L00232080/2020	EPI_ISL_535974	2020_03	29864	0
G	hCoV-19/Canada/QC-LSPQ-L00232148/2020	EPI_ISL_535980	2020_03	29818	82
G	hCoV-19/Canada/QC-LSPQ-L00232187/2020	EPI_ISL_535981	2020_03	29849	1
G	hCoV-19/Canada/QC-LSPQ-L00232310/2020	EPI_ISL_535984	2020_03	29819	1
G	hCoV-19/Canada/QC-LSPQ-L00232405/2020	EPI_ISL_535985	2020_03	29822	0
G	hCoV-19/Canada/QC-LSPQ-L00232447/2020	EPI_ISL_535987	2020_03	29819	1
G	hCoV-19/Canada/QC-LSPQ-L00232603/2020	EPI_ISL_535990	2020_03	29821	0
G	hCoV-19/Canada/QC-LSPQ-L00232614/2020	EPI_ISL_535992	2020_03	29863	2
G	hCoV-19/Canada/QC-LSPQ-L00232810/2020	EPI_ISL_535996	2020_03	29831	0
G	hCoV-19/Canada/QC-LSPQ-L00232822/2020	EPI_ISL_535998	2020_03	29822	1
G	hCoV-19/Canada/QC-LSPQ-L00232866/2020	EPI_ISL_535999	2020_03	29816	147
G	hCoV-19/Canada/QC-LSPQ-L00232917/2020	EPI_ISL_536000	2020_03	29850	0
G	hCoV-19/Canada/QC-LSPQ-L00232925/2020	EPI_ISL_536001	2020_03	29822	0
G	hCoV-19/Canada/QC-LSPQ-L00233063/2020	EPI_ISL_536008	2020_03	29821	0
G	hCoV-19/Canada/QC-LSPQ-L00233253/2020	EPI_ISL_536013	2020_03	29820	0
G	hCoV-19/Canada/QC-LSPQ-L00233380/2020	EPI_ISL_536021	2020_03	29864	3
G	hCoV-19/Canada/QC-LSPQ-L00233585/2020	EPI_ISL_536029	2020_03	29835	0
G	hCoV-19/Canada/QC-LSPQ-L00233633/2020	EPI_ISL_536030	2020_03	29818	63
G	hCoV-19/Canada/QC-LSPQ-L00233661/2020	EPI_ISL_536031	2020_03	29864	1
G	hCoV-19/Canada/QC-LSPQ-L00233681/2020	EPI_ISL_536032	2020_03	29822	0
G	hCoV-19/Canada/QC-LSPQ-L00233683/2020	EPI_ISL_536033	2020_03	29852	0
G	hCoV-19/Canada/QC-LSPQ-L00233695/2020	EPI_ISL_536034	2020_03	29855	1
G	hCoV-19/Canada/QC-LSPQ-L00233721/2020	EPI_ISL_536037	2020_03	29864	0
G	hCoV-19/Canada/QC-LSPQ-L00233734/2020	EPI_ISL_536038	2020_03	29853	0
G	hCoV-19/Canada/QC-LSPQ-L00233793/2020	EPI_ISL_536039	2020_03	29821	0
G	hCoV-19/Canada/QC-LSPQ-L00233835/2020	EPI_ISL_536041	2020_03	29856	0
G	hCoV-19/Canada/QC-LSPQ-L00234397/2020	EPI_ISL_536053	2020_03	29822	91
G	hCoV-19/Canada/QC-LSPQ-L00234533/2020	EPI_ISL_536056	2020_03	29845	1
G	hCoV-19/Canada/QC-LSPQ-L00234537/2020	EPI_ISL_536057	2020_03	29818	148
G	hCoV-19/Canada/QC-LSPQ-L00234611/2020	EPI_ISL_536062	2020_03	29824	0
G	hCoV-19/Canada/QC-LSPQ-L00234676/2020	EPI_ISL_536068	2020_03	29821	0
G	hCoV-19/Canada/QC-LSPQ-L00234790/2020	EPI_ISL_536070	2020_03	29819	119
G	hCoV-19/Canada/QC-LSPQ-L00234871/2020	EPI_ISL_536074	2020_03	29837	46
G	hCoV-19/Canada/QC-LSPQ-L00234872/2020	EPI_ISL_536075	2020_03	29820	146
G	hCoV-19/Canada/QC-LSPQ-L00234878/2020	EPI_ISL_536077	2020_03	29822	0
G	hCoV-19/Canada/QC-LSPQ-L00234905/2020	EPI_ISL_536080	2020_03	29851	0
G	hCoV-19/Canada/QC-LSPQ-L00235136/2020	EPI_ISL_536088	2020_03	29821	0
G	hCoV-19/Canada/QC-LSPQ-L00235261/2020	EPI_ISL_536092	2020_03	29835	0
G	hCoV-19/Canada/QC-LSPQ-L00235295/2020	EPI_ISL_536094	2020_03	29820	0
G	hCoV-19/Canada/QC-LSPQ-L00235378/2020	EPI_ISL_536095	2020_03	29858	1
G	hCoV-19/Canada/QC-LSPQ-L00235380/2020	EPI_ISL_536096	2020_03	29854	0
G	hCoV-19/Canada/QC-LSPQ-L00235552/2020	EPI_ISL_536099	2020_03	29826	0
G	hCoV-19/Canada/QC-LSPQ-L00235561/2020	EPI_ISL_536101	2020_03	29845	0
G	hCoV-19/Canada/QC-LSPQ-L00235815/2020	EPI_ISL_536110	2020_03	29821	0
G	hCoV-19/Canada/QC-LSPQ-L00235866/2020	EPI_ISL_536113	2020_03	29822	0
G	hCoV-19/Canada/QC-LSPQ-L00236394/2020	EPI_ISL_536126	2020_03	29824	0
G	hCoV-19/Canada/QC-LSPQ-L00236403/2020	EPI_ISL_536128	2020_03	29851	230
G	hCoV-19/Canada/QC-LSPQ-L00236426/2020	EPI_ISL_536129	2020_03	29818	0
G	hCoV-19/Canada/QC-LSPQ-L00236526/2020	EPI_ISL_536132	2020_03	29850	0
G	hCoV-19/Canada/QC-LSPQ-L00236573/2020	EPI_ISL_536138	2020_03	29826	0
G	hCoV-19/Canada/QC-LSPQ-L00236653/2020	EPI_ISL_536145	2020_03	29817	1
G	hCoV-19/Canada/QC-LSPQ-L00236779/2020	EPI_ISL_536147	2020_03	29809	90
G	hCoV-19/Canada/QC-LSPQ-L00237080/2020	EPI_ISL_536159	2020_03	29823	0
G	hCoV-19/Canada/QC-LSPQ-L00237217/2020	EPI_ISL_536168	2020_03	29850	0
G	hCoV-19/Canada/QC-LSPQ-L00237242/2020	EPI_ISL_536169	2020_03	29819	0
G	hCoV-19/Canada/QC-LSPQ-L00237312/2020	EPI_ISL_536173	2020_03	29821	1
G	hCoV-19/Canada/QC-LSPQ-L00237365/2020	EPI_ISL_536176	2020_03	29810	0
G	hCoV-19/Canada/QC-LSPQ-L00237374/2020	EPI_ISL_536179	2020_03	29839	1
G	hCoV-19/Canada/QC-LSPQ-L00237419/2020	EPI_ISL_536180	2020_03	29845	1
G	hCoV-19/Canada/QC-LSPQ-L00237490/2020	EPI_ISL_536182	2020_03	29824	0
G	hCoV-19/Canada/QC-LSPQ-L00237503/2020	EPI_ISL_536183	2020_03	29846	0
G	hCoV-19/Canada/QC-LSPQ-L00237841/2020	EPI_ISL_536195	2020_03	29820	1
G	hCoV-19/Canada/QC-LSPQ-L00237878/2020	EPI_ISL_536196	2020_03	29823	0
G	hCoV-19/Canada/QC-LSPQ-L00237942/2020	EPI_ISL_536201	2020_03	29824	0
G	hCoV-19/Canada/QC-LSPQ-L00238722/2020	EPI_ISL_536215	2020_03	29824	129
G	hCoV-19/Canada/QC-LSPQ-L00238725/2020	EPI_ISL_536216	2020_03	29862	0
G	hCoV-19/Canada/QC-LSPQ-L00238797/2020	EPI_ISL_536219	2020_03	29824	0
G	hCoV-19/Canada/QC-LSPQ-L00238803/2020	EPI_ISL_536220	2020_03	29859	1
G	hCoV-19/Canada/QC-LSPQ-L00238862/2020	EPI_ISL_536224	2020_03	29854	1
G	hCoV-19/Canada/QC-LSPQ-L00238922/2020	EPI_ISL_536228	2020_03	29819	203
G	hCoV-19/Canada/QC-LSPQ-L00239009/2020	EPI_ISL_536230	2020_03	29850	0
G	hCoV-19/Canada/QC-LSPQ-L00239134/2020	EPI_ISL_536234	2020_03	29848	0
G	hCoV-19/Canada/QC-LSPQ-L00239192/2020	EPI_ISL_536236	2020_03	29843	158
G	hCoV-19/Canada/QC-LSPQ-L00239194/2020	EPI_ISL_536237	2020_03	29863	0
G	hCoV-19/Canada/QC-LSPQ-L00239249/2020	EPI_ISL_536240	2020_03	29855	0
G	hCoV-19/Canada/QC-LSPQ-L00239255/2020	EPI_ISL_536241	2020_03	29860	1
G	hCoV-19/Canada/QC-LSPQ-L00239296/2020	EPI_ISL_536243	2020_03	29826	1
G	hCoV-19/Canada/QC-LSPQ-L00239391/2020	EPI_ISL_536246	2020_03	29828	0
G	hCoV-19/Canada/QC-LSPQ-L00239402/2020	EPI_ISL_536249	2020_03	29825	130
G	hCoV-19/Canada/QC-LSPQ-L00239407/2020	EPI_ISL_536250	2020_03	29846	0
G	hCoV-19/Canada/QC-LSPQ-L00239412/2020	EPI_ISL_536251	2020_03	29824	0
G	hCoV-19/Canada/QC-LSPQ-L00239413/2020	EPI_ISL_536252	2020_03	29839	0
G	hCoV-19/Canada/QC-LSPQ-L00239865/2020	EPI_ISL_536257	2020_03	29825	0
G	hCoV-19/Canada/QC-LSPQ-L00239991/2020	EPI_ISL_536260	2020_03	29854	0
G	hCoV-19/Canada/QC-LSPQ-L00240414/2020	EPI_ISL_536270	2020_03	29857	0
G	hCoV-19/Canada/QC-LSPQ-L00240479/2020	EPI_ISL_536272	2020_03	29856	0
G	hCoV-19/Canada/QC-LSPQ-L00241435/2020	EPI_ISL_536280	2020_03	29813	0
G	hCoV-19/Canada/QC-LSPQ-L00241439/2020	EPI_ISL_536281	2020_03	29817	0
G	hCoV-19/Canada/QC-LSPQ-L00241444/2020	EPI_ISL_536282	2020_03	29813	0
G	hCoV-19/Canada/QC-LSPQ-L00241602/2020	EPI_ISL_536284	2020_03	29815	0
G	hCoV-19/Canada/QC-LSPQ-L00241648/2020	EPI_ISL_536286	2020_03	29813	0
G	hCoV-19/Canada/QC-LSPQ-L00241670/2020	EPI_ISL_536288	2020_03	29803	82
G	hCoV-19/Canada/QC-LSPQ-L00241782/2020	EPI_ISL_536290	2020_03	29782	2
G	hCoV-19/Canada/QC-LSPQ-L00241909/2020	EPI_ISL_536295	2020_03	29818	0
G	hCoV-19/Canada/QC-LSPQ-L00241965/2020	EPI_ISL_536300	2020_03	29816	0
G	hCoV-19/Canada/QC-LSPQ-L00242011/2020	EPI_ISL_536302	2020_03	29813	0
G	hCoV-19/Canada/QC-LSPQ-L00242019/2020	EPI_ISL_536304	2020_03	29819	0
G	hCoV-19/Canada/QC-LSPQ-L00242033/2020	EPI_ISL_536305	2020_03	29818	0
G	hCoV-19/Canada/QC-LSPQ-L00242487/2020	EPI_ISL_536322	2020_03	29849	0
G	hCoV-19/Canada/QC-LSPQ-L00242505/2020	EPI_ISL_536323	2020_03	29819	0
G	hCoV-19/Canada/QC-LSPQ-L00242547/2020	EPI_ISL_536325	2020_03	29815	74
G	hCoV-19/Canada/QC-LSPQ-L00243222/2020	EPI_ISL_536350	2020_03	29835	0
G	hCoV-19/Canada/QC-LSPQ-L00243608/2020	EPI_ISL_536367	2020_03	29818	0
G	hCoV-19/Canada/QC-LSPQ-L00243673/2020	EPI_ISL_536369	2020_03	29840	2
G	hCoV-19/Canada/QC-LSPQ-L00243708/2020	EPI_ISL_536372	2020_03	29846	15
G	hCoV-19/Canada/QC-LSPQ-L00243797/2020	EPI_ISL_536379	2020_03	29817	0
G	hCoV-19/Canada/QC-LSPQ-L00243994/2020	EPI_ISL_536386	2020_03	29818	30
G	hCoV-19/Canada/QC-LSPQ-L00244068/2020	EPI_ISL_536388	2020_03	29820	2
G	hCoV-19/Canada/QC-LSPQ-L00244197/2020	EPI_ISL_536391	2020_03	29853	0
G	hCoV-19/Canada/QC-LSPQ-L00244338/2020	EPI_ISL_536393	2020_03	29859	0
G	hCoV-19/Canada/QC-LSPQ-L00244354/2020	EPI_ISL_536395	2020_03	29809	2
G	hCoV-19/Canada/QC-LSPQ-L00244359/2020	EPI_ISL_536397	2020_03	29840	0
G	hCoV-19/Canada/QC_AA1/2020	EPI_ISL_515197	2020_04	29782	4
G	hCoV-19/Canada/QC_AA3/2020	EPI_ISL_444495	2020_04	29782	4
G	hCoV-19/Canada/QC_AA4/2020	EPI_ISL_476498	2020_04	29782	4
G	hCoV-19/Canada/QC_AB2/2020	EPI_ISL_444500	2020_04	29782	295
G	hCoV-19/Canada/QC_AC4/2020	EPI_ISL_463903	2020_04	29708	1
G	hCoV-19/Canada/QC_AC6.1/2020	EPI_ISL_463904	2020_04	29782	0
G	hCoV-19/Canada/QC_AC9/2020	EPI_ISL_476499	2020_04	29782	2
G	hCoV-19/Canada/QC_AD7/2020	EPI_ISL_476501	2020_04	29782	1
G	hCoV-19/Canada/QC_AE4/2020	EPI_ISL_463905	2020_04	29782	255
G	hCoV-19/Canada/QC_AE9/2020	EPI_ISL_463908	2020_04	29782	2
G	hCoV-19/Canada/QC_AF1/2020	EPI_ISL_463909	2020_04	29782	6
G	hCoV-19/Canada/QC_AF2/2020	EPI_ISL_463910	2020_04	29782	4
G	hCoV-19/Canada/QC_AF6/2020	EPI_ISL_463912	2020_04	29773	255
G	hCoV-19/Canada/QC_AG2/2020	EPI_ISL_515203	2020_04	29782	80
G	hCoV-19/Canada/QC_AG3/2020	EPI_ISL_476502	2020_04	29782	2
G	hCoV-19/Canada/QC_AG4/2020	EPI_ISL_463913	2020_04	29782	253
G	hCoV-19/Canada/QC_AH2/2020	EPI_ISL_463914	2020_04	29782	4
G	hCoV-19/Canada/QC_AI5/2020	EPI_ISL_463917	2020_04	29782	2
G	hCoV-19/Canada/QC_AI6/2020	EPI_ISL_476505	2020_04	29782	2
G	hCoV-19/Canada/QC_AI9/2020	EPI_ISL_463918	2020_04	29782	4
G	hCoV-19/Canada/QC_AJ8/2020	EPI_ISL_476506	2020_04	29782	4
G	hCoV-19/Canada/QC_AK1/2020	EPI_ISL_476507	2020_04	29782	4
G	hCoV-19/Canada/QC_AK6/2020	EPI_ISL_515209	2020_04	29782	2
G	hCoV-19/Canada/QC_AK9/2020	EPI_ISL_515210	2020_04	29782	1
G	hCoV-19/Canada/QC_AL3/2020	EPI_ISL_515211	2020_04	29782	253
G	hCoV-19/Canada/QC_AL4/2020	EPI_ISL_515212	2020_04	29782	0
G	hCoV-19/Canada/QC_AM1/2020	EPI_ISL_476508	2020_04	29782	2
G	hCoV-19/Canada/QC_AM4/2020	EPI_ISL_515214	2020_04	29782	0
G	hCoV-19/Canada/QC_AM8/2020	EPI_ISL_515216	2020_04	29782	4
G	hCoV-19/Canada/QC_AN9/2020	EPI_ISL_515222	2020_04	29782	0
G	hCoV-19/Canada/QC_AO3/2020	EPI_ISL_463920	2020_04	29782	224
G	hCoV-19/Canada/QC_AO7/2020	EPI_ISL_463922	2020_04	29782	2
G	hCoV-19/Canada/QC_AO9/2020	EPI_ISL_463923	2020_04	29782	15
G	hCoV-19/Canada/QC_AP4/2020	EPI_ISL_515224	2020_04	29782	0
G	hCoV-19/Canada/QC_AP8/2020	EPI_ISL_476510	2020_04	29782	2
G	hCoV-19/Canada/QC_AQ3/2020	EPI_ISL_476511	2020_04	29782	0
G	hCoV-19/Canada/QC_AQ4/2020	EPI_ISL_463928	2020_04	29782	255
G	hCoV-19/Canada/QC_AQ5/2020	EPI_ISL_463929	2020_04	29782	4
G	hCoV-19/Canada/QC_AQ6/2020	EPI_ISL_463930	2020_04	29782	2
G	hCoV-19/Canada/QC_AQ8/2020	EPI_ISL_515225	2020_04	29782	0
G	hCoV-19/Canada/QC_AR3/2020	EPI_ISL_463931	2020_04	29782	4
G	hCoV-19/Canada/QC_AR6/2020	EPI_ISL_463933	2020_04	29782	2
G	hCoV-19/Canada/QC_AS4/2020	EPI_ISL_463936	2020_04	29782	4
G	hCoV-19/Canada/QC_AS5/2020	EPI_ISL_476513	2020_04	29776	2
G	hCoV-19/Canada/QC_AT3/2020	EPI_ISL_463940	2020_03	29782	2
G	hCoV-19/Canada/QC_AT4/2020	EPI_ISL_515228	2020_04	29782	0
G	hCoV-19/Canada/QC_AT6/2020	EPI_ISL_463941	2020_04	29782	253
G	hCoV-19/Canada/QC_AU3/2020	EPI_ISL_515229	2020_04	29782	0
G	hCoV-19/Canada/QC_AU6/2020	EPI_ISL_515230	2020_04	29782	4
G	hCoV-19/Canada/QC_AU7/2020	EPI_ISL_463946	2020_04	29782	3
G	hCoV-19/Canada/QC_AU9/2020	EPI_ISL_463948	2020_04	29782	0
G	hCoV-19/Canada/QC_AW7/2020	EPI_ISL_515233	2020_04	29782	0
G	hCoV-19/Canada/QC_AX3/2020	EPI_ISL_515234	2020_04	29782	2
G	hCoV-19/Canada/QC_AX6/2020	EPI_ISL_463953	2020_04	29782	3
G	hCoV-19/Canada/QC_AY1/2020	EPI_ISL_463954	2020_04	29782	2
G	hCoV-19/Canada/QC_AY6/2020	EPI_ISL_515235	2020_04	29782	2
G	hCoV-19/Canada/QC_AY9/2020	EPI_ISL_463957	2020_04	29782	2
G	hCoV-19/Canada/QC_AZ6/2020	EPI_ISL_515237	2020_04	29782	2
G	hCoV-19/Canada/QC_AZ9/2020	EPI_ISL_463961	2020_04	29782	4
G	hCoV-19/Canada/QC_BA5/2020	EPI_ISL_463962	2020_04	29773	4
G	hCoV-19/Canada/QC_BA6/2020	EPI_ISL_463963	2020_04	29782	0
G	hCoV-19/Canada/QC_BB3/2020	EPI_ISL_515241	2020_04	29782	2
G	hCoV-19/Canada/QC_BB6/2020	EPI_ISL_515243	2020_04	29782	277
G	hCoV-19/Canada/QC_BB7/2020	EPI_ISL_463965	2020_04	29782	4
G	hCoV-19/Canada/QC_BB9/2020	EPI_ISL_515244	2020_04	29782	0
G	hCoV-19/Canada/QC_BC5/2020	EPI_ISL_463968	2020_04	29782	3
G	hCoV-19/Canada/QC_BC6/2020	EPI_ISL_515245	2020_04	29782	2
G	hCoV-19/Canada/Qc-L00240556/2020	EPI_ISL_450302	2020_03	29864	0
G	hCoV-19/Canada/Qc-L00240652/2020	EPI_ISL_450304	2020_03	29864	0
G	hCoV-19/Canada/Qc-L00240685/2020	EPI_ISL_450305	2020_03	29864	25
G	hCoV-19/Canada/Qc-L00240846/2020	EPI_ISL_465688	2020_03	29837	0
G	hCoV-19/Canada/Qc-L00240851/2020	EPI_ISL_465689	2020_03	29837	0
G	hCoV-19/Canada/Qc-L00240947/2020	EPI_ISL_465693	2020_03	29837	0
G	hCoV-19/Canada/Qc-L00240954/2020	EPI_ISL_450307	2020_03	29864	0
G	hCoV-19/Canada/Qc-L00240979/2020	EPI_ISL_450308	2020_03	29839	11
G	hCoV-19/Canada/Qc-L00241026/2020	EPI_ISL_450309	2020_03	29866	27
G	hCoV-19/Canada/Qc-L00241168/2020	EPI_ISL_450311	2020_03	29866	23
G	hCoV-19/Canada/Qc-L00241205/2020	EPI_ISL_450313	2020_03	29864	25
G	hCoV-19/Canada/Qc-L00241208/2020	EPI_ISL_450314	2020_03	29864	0
G	hCoV-19/Canada/Qc-L00241214/2020	EPI_ISL_465700	2020_03	29837	1
G	hCoV-19/Canada/Qc-L00241245/2020	EPI_ISL_450315	2020_03	29864	6
G	hCoV-19/Canada/Qc-L00241251/2020	EPI_ISL_465701	2020_03	29837	0
G	hCoV-19/Canada/Qc-L00241349/2020	EPI_ISL_465703	2020_03	29863	1
G	hCoV-19/Chile/Chillan_3/2020	EPI_ISL_445332	2020_03	29824	0
G	hCoV-19/Chile/Concepcion_2/2020	EPI_ISL_445333	2020_03	29811	0
G	hCoV-19/Chile/Coyhaique_1/2020	EPI_ISL_445296	2020_03	29865	2
G	hCoV-19/Chile/Independencia-27991/2020	EPI_ISL_459857	2020_03	29782	0
G	hCoV-19/Chile/Melipilla-32205/2020	EPI_ISL_459859	2020_03	29782	0
G	hCoV-19/Chile/Puerto_Montt_1/2020	EPI_ISL_445246	2020_03	29831	0
G	hCoV-19/Chile/Puerto_Montt_2/2020	EPI_ISL_445334	2020_03	29810	3
G	hCoV-19/Chile/Punta_Arenas_1/2020	EPI_ISL_445268	2020_03	29851	0
G	hCoV-19/Chile/Punta_Arenas_12/2020	EPI_ISL_445293	2020_03	29858	0
G	hCoV-19/Chile/Punta_Arenas_14/2020	EPI_ISL_445295	2020_03	29888	0
G	hCoV-19/Chile/Punta_Arenas_2/2020	EPI_ISL_445269	2020_03	29790	1
G	hCoV-19/Chile/Punta_Arenas_3/2020	EPI_ISL_445280	2020_03	29837	0
G	hCoV-19/Chile/Punta_Arenas_4/2020	EPI_ISL_445282	2020_03	29861	0
G	hCoV-19/Chile/Rancagua_1/2020	EPI_ISL_445273	2020_03	29848	0
G	hCoV-19/Chile/Rancagua_6/2020	EPI_ISL_445278	2020_03	29832	0
G	hCoV-19/Chile/Santiago-04917/2020	EPI_ISL_468749	2020_04	29782	1
G	hCoV-19/Chile/Santiago-05230/2020	EPI_ISL_468747	2020_04	29782	0
G	hCoV-19/Chile/Santiago-25669/2020	EPI_ISL_459862	2020_03	29782	1
G	hCoV-19/Chile/Santiago_11/2020	EPI_ISL_445254	2020_03	29787	0
G	hCoV-19/Chile/Santiago_18/2020	EPI_ISL_445261	2020_03	29821	0
G	hCoV-19/Chile/Santiago_19/2020	EPI_ISL_445262	2020_03	29805	0
G	hCoV-19/Chile/Santiago_20/2020	EPI_ISL_445263	2020_03	29788	2
G	hCoV-19/Chile/Santiago_22/2020	EPI_ISL_445265	2020_03	29885	0
G	hCoV-19/Chile/Santiago_26/2020	EPI_ISL_445305	2020_03	29838	0
G	hCoV-19/Chile/Santiago_28/2020	EPI_ISL_445307	2020_03	29830	0
G	hCoV-19/Chile/Santiago_29/2020	EPI_ISL_445308	2020_03	29873	1
G	hCoV-19/Chile/Santiago_30/2020	EPI_ISL_445309	2020_03	29838	0
G	hCoV-19/Chile/Santiago_32/2020	EPI_ISL_445311	2020_03	29832	1
G	hCoV-19/Chile/Santiago_33/2020	EPI_ISL_445312	2020_03	29824	2
G	hCoV-19/Chile/Santiago_34/2020	EPI_ISL_445313	2020_03	29838	1
G	hCoV-19/Chile/Santiago_35/2020	EPI_ISL_445314	2020_03	29853	0
G	hCoV-19/Chile/Santiago_41/2020	EPI_ISL_445320	2020_03	29840	0
G	hCoV-19/Chile/Santiago_44/2020	EPI_ISL_445323	2020_03	29804	0
G	hCoV-19/Chile/Santiago_45/2020	EPI_ISL_445324	2020_03	29900	0
G	hCoV-19/Chile/Santiago_47/2020	EPI_ISL_445326	2020_03	29798	0
G	hCoV-19/Chile/Santiago_48/2020	EPI_ISL_445327	2020_03	29809	0
G	hCoV-19/Chile/Santiago_5/2020	EPI_ISL_445248	2020_03	29791	1
G	hCoV-19/Chile/Santiago_51/2020	EPI_ISL_445330	2020_03	29821	1
G	hCoV-19/Chile/Santiago_59/2020	EPI_ISL_445355	2020_03	29800	0
G	hCoV-19/Chile/Santiago_68/2020	EPI_ISL_445364	2020_03	29822	0
G	hCoV-19/Chile/Santiago_7/2020	EPI_ISL_445250	2020_03	29779	0
G	hCoV-19/Chile/Santiago_70/2020	EPI_ISL_445366	2020_03	29870	0
G	hCoV-19/Chile/Santiago_75/2020	EPI_ISL_445371	2020_03	29834	0
G	hCoV-19/Chile/Santiago_79/2020	EPI_ISL_445376	2020_04	29820	0
G	hCoV-19/Chile/Santiago_9/2020	EPI_ISL_445252	2020_03	29848	0
G	hCoV-19/Chile/Valparaiso_1/2020	EPI_ISL_445272	2020_03	29836	1
G	hCoV-19/Chile/Valparaiso_4/2020	EPI_ISL_445287	2020_03	29843	0
G	hCoV-19/Colombia/105142/2020	EPI_ISL_526950	2020_05	29773	222
G	hCoV-19/Colombia/109363/2020	EPI_ISL_526949	2020_05	29773	4
G	hCoV-19/Colombia/84730/2020	EPI_ISL_497738	2020_03	29782	5
G	hCoV-19/Colombia/85082/2020	EPI_ISL_497744	2020_03	29782	5
G	hCoV-19/Colombia/88496/2020	EPI_ISL_498154	2020_03	29782	2
G	hCoV-19/Colombia/88612/2020	EPI_ISL_498155	2020_03	29782	4
G	hCoV-19/Colombia/88712/2020	EPI_ISL_498156	2020_03	29782	2
G	hCoV-19/Colombia/88871/2020	EPI_ISL_498158	2020_03	29782	4
G	hCoV-19/Colombia/89002/2020	EPI_ISL_498159	2020_03	29782	3
G	hCoV-19/Colombia/95319/2020	EPI_ISL_498163	2020_04	29782	4
G	hCoV-19/Colombia/95663/2020	EPI_ISL_498165	2020_04	29782	4
G	hCoV-19/Colombia/96791/2020	EPI_ISL_498167	2020_04	29782	4
G	hCoV-19/Colombia/AG-2/2020	EPI_ISL_526958	2020_07	29782	3
G	hCoV-19/Colombia/ANT-UdeA-200325-01/2020	EPI_ISL_536399	2020_03	29782	2
G	hCoV-19/Colombia/GUR-0458/2020	EPI_ISL_447745	2020_03	29700	0
G	hCoV-19/Colombia/GUR-0459/2020	EPI_ISL_447746	2020_03	29714	0
G	hCoV-19/Colombia/GUR-0574/2020	EPI_ISL_447747	2020_03	29815	91
G	hCoV-19/Colombia/GUR-1215/2020	EPI_ISL_447754	2020_03	29724	0
G	hCoV-19/Colombia/GUV-92034/2020	EPI_ISL_447755	2020_03	29707	0
G	hCoV-19/Colombia/GUV-92042/2020	EPI_ISL_447756	2020_03	29706	0
G	hCoV-19/Colombia/GUV-92061/2020	EPI_ISL_447759	2020_03	29715	0
G	hCoV-19/Colombia/GUV-92087/2020	EPI_ISL_447760	2020_03	29724	0
G	hCoV-19/Colombia/GUV-92218/2020	EPI_ISL_447765	2020_03	29724	0
G	hCoV-19/Colombia/GVI-93473/2020	EPI_ISL_447781	2020_04	29715	101
G	hCoV-19/Colombia/GVI97517/2020	EPI_ISL_447816	2020_04	29705	0
G	hCoV-19/Colombia/INS-79190/2020	EPI_ISL_456120	2020_03	29806	205
G	hCoV-19/Colombia/INS-79743/2020	EPI_ISL_456145	2020_03	29820	290
G	hCoV-19/Colombia/INS-79943/2020	EPI_ISL_456138	2020_03	29836	195
G	hCoV-19/Colombia/INS-79965/2020	EPI_ISL_456150	2020_03	29823	0
G	hCoV-19/Colombia/INS-80245/2020	EPI_ISL_456155	2020_03	29820	6
G	hCoV-19/Colombia/INS-80656/2020	EPI_ISL_456126	2020_03	29813	184
G	hCoV-19/Colombia/INS-82457/2020	EPI_ISL_456146	2020_03	29820	0
G	hCoV-19/Colombia/covo-289/2020	EPI_ISL_526967	2020_07	29782	4
G	hCoV-19/Costa Rica/01/2020	EPI_ISL_434533	2020_03	29845	0
G	hCoV-19/Costa Rica/02/2020	EPI_ISL_434535	2020_03	29834	0
G	hCoV-19/Costa Rica/06/2020	EPI_ISL_434539	2020_03	29769	0
G	hCoV-19/Costa Rica/INC-0026/2020	EPI_ISL_491438	2020_03	29813	0
G	hCoV-19/Costa Rica/INC-0028/2020	EPI_ISL_491440	2020_03	29786	0
G	hCoV-19/Costa Rica/INC-0029/2020	EPI_ISL_491441	2020_03	29780	0
G	hCoV-19/Costa Rica/INC-0030/2020	EPI_ISL_491442	2020_03	29813	0
G	hCoV-19/Costa Rica/INC-0032/2020	EPI_ISL_491444	2020_03	29785	0
G	hCoV-19/Costa Rica/INC-0033/2020	EPI_ISL_491445	2020_03	29790	0
G	hCoV-19/Costa Rica/INC-0034/2020	EPI_ISL_491446	2020_03	29790	0
G	hCoV-19/Costa Rica/INC-0037/2020	EPI_ISL_491448	2020_03	29794	0
G	hCoV-19/Costa Rica/INC-0038/2020	EPI_ISL_491449	2020_03	29856	0
G	hCoV-19/Costa Rica/INC-0042/2020	EPI_ISL_491453	2020_03	29816	0
G	hCoV-19/Costa Rica/INC-0043/2020	EPI_ISL_491454	2020_03	29826	0
G	hCoV-19/Costa Rica/INC-0047/2020	EPI_ISL_512653	2020_03	29800	0
G	hCoV-19/Costa Rica/INC-0048/2020	EPI_ISL_512654	2020_03	29790	0
G	hCoV-19/Costa Rica/INC-0050/2020	EPI_ISL_512656	2020_03	29763	0
G	hCoV-19/Costa Rica/INC-0052/2020	EPI_ISL_512658	2020_03	29807	0
G	hCoV-19/Costa Rica/INC-0058/2020	EPI_ISL_512664	2020_06	29802	0
G	hCoV-19/Costa Rica/INC-0080/2020	EPI_ISL_527748	2020_07	29826	0
G	hCoV-19/Costa Rica/INC-0085/2020	EPI_ISL_527753	2020_07	29817	0
G	hCoV-19/Crimea/SRC-80603/2020	EPI_ISL_428901	2020_03	29870	0
G	hCoV-19/Croatia/1560_Split/2020	EPI_ISL_454583	2020_03	29852	0
G	hCoV-19/Croatia/17-S7/2020	EPI_ISL_429802	2020_03	29870	733
G	hCoV-19/Croatia/17-S7new/2020	EPI_ISL_455566	2020_03	29870	0
G	hCoV-19/Croatia/297_Varazdin/2020	EPI_ISL_454592	2020_03	29851	6
G	hCoV-19/Croatia/592_Osijek/2020	EPI_ISL_454578	2020_03	29845	67
G	hCoV-19/Croatia/AU-S10/2020	EPI_ISL_429705	2020_03	29870	527
G	hCoV-19/Croatia/AU-S10new/2020	EPI_ISL_468656	2020_04	29870	0
G	hCoV-19/Croatia/LG-S2new/2020	EPI_ISL_468591	2020_04	29870	0
G	hCoV-19/Croatia/OY-S1/2020	EPI_ISL_429659	2020_03	29870	352
G	hCoV-19/Croatia/OY-S1new/2020	EPI_ISL_454574	2020_04	29870	0
G	hCoV-19/Cuba/USAFSAM-S030/2020	EPI_ISL_513312	2020_03	29811	215
G	hCoV-19/Cyprus/007/2020	EPI_ISL_463747	2020_04	29870	1
G	hCoV-19/Czech Republic/951/2020	EPI_ISL_414477	2020_03	29621	21
G	hCoV-19/Czech Republic/ChVir1630/2020	EPI_ISL_416742	2020_02	29855	0
G	hCoV-19/Czech Republic/IAB_1/2020	EPI_ISL_426883	2020_03	29855	0
G	hCoV-19/Czech Republic/IAB_12/2020	EPI_ISL_426888	2020_03	29859	0
G	hCoV-19/Czech Republic/IAB_15/2020	EPI_ISL_426890	2020_03	29862	0
G	hCoV-19/Czech Republic/IAB_18/2020	EPI_ISL_426893	2020_03	29855	0
G	hCoV-19/Czech Republic/IAB_21/2020	EPI_ISL_426895	2020_03	29860	0
G	hCoV-19/Czech Republic/NRL_1885/2020	EPI_ISL_471530	2020_03	29782	0
G	hCoV-19/Czech Republic/NRL_4033/2020	EPI_ISL_476067	2020_03	29782	1
G	hCoV-19/Czech Republic/NRL_5815/2020	EPI_ISL_491119	2020_04	29782	0
G	hCoV-19/DRC/10070/2020	EPI_ISL_527544	2020_05	29666	267
G	hCoV-19/DRC/10324/2020	EPI_ISL_527545	2020_05	29627	265
G	hCoV-19/DRC/10346/2020	EPI_ISL_527546	2020_05	29334	274
G	hCoV-19/DRC/10371/2020	EPI_ISL_527489	2020_05	29626	277
G	hCoV-19/DRC/10502/2020	EPI_ISL_527547	2020_05	29647	267
G	hCoV-19/DRC/10533/2020	EPI_ISL_527548	2020_05	29645	276
G	hCoV-19/DRC/10644/2020	EPI_ISL_527549	2020_05	29647	270
G	hCoV-19/DRC/10733/2020	EPI_ISL_513630	2020_05	29647	0
G	hCoV-19/DRC/108/2020	EPI_ISL_417948	2020_03	29797	3
G	hCoV-19/DRC/11022/2020	EPI_ISL_527551	2020_05	29626	268
G	hCoV-19/DRC/11024/2020	EPI_ISL_527552	2020_05	29378	292
G	hCoV-19/DRC/11026/2020	EPI_ISL_527553	2020_05	29636	268
G	hCoV-19/DRC/11031/2020	EPI_ISL_527554	2020_05	29626	279
G	hCoV-19/DRC/11041/2020	EPI_ISL_527555	2020_05	29621	272
G	hCoV-19/DRC/1131/2020	EPI_ISL_429255	2020_04	29798	267
G	hCoV-19/DRC/11318/2020	EPI_ISL_527559	2020_05	29787	269
G	hCoV-19/DRC/11348/2020	EPI_ISL_527560	2020_05	29761	267
G	hCoV-19/DRC/11411/2020	EPI_ISL_527561	2020_05	29647	268
G	hCoV-19/DRC/11460/2020	EPI_ISL_527562	2020_05	29321	272
G	hCoV-19/DRC/11477/2020	EPI_ISL_527563	2020_05	29672	268
G	hCoV-19/DRC/11486/2020	EPI_ISL_527564	2020_05	29636	271
G	hCoV-19/DRC/11572/2020	EPI_ISL_527565	2020_05	29668	269
G	hCoV-19/DRC/11623/2020	EPI_ISL_527566	2020_05	29626	268
G	hCoV-19/DRC/11624/2020	EPI_ISL_527567	2020_05	29629	266
G	hCoV-19/DRC/11631/2020	EPI_ISL_527568	2020_05	29616	285
G	hCoV-19/DRC/11648/2020	EPI_ISL_527569	2020_05	29753	264
G	hCoV-19/DRC/11652/2020	EPI_ISL_527570	2020_05	29648	268
G	hCoV-19/DRC/11733/2020	EPI_ISL_527571	2020_05	29829	268
G	hCoV-19/DRC/11806/2020	EPI_ISL_527572	2020_05	29647	268
G	hCoV-19/DRC/1234/2020	EPI_ISL_429258	2020_04	29331	1291
G	hCoV-19/DRC/1249/2020	EPI_ISL_429259	2020_04	29803	395
G	hCoV-19/DRC/1319/2020	EPI_ISL_431011	2020_04	29788	352
G	hCoV-19/DRC/1324/2020	EPI_ISL_435033	2020_04	29783	109
G	hCoV-19/DRC/1423/2020	EPI_ISL_434710	2020_04	29802	84
G	hCoV-19/DRC/1516/2020	EPI_ISL_435032	2020_04	29830	0
G	hCoV-19/DRC/1715/2020	EPI_ISL_435156	2020_04	29741	267
G	hCoV-19/DRC/191/2020	EPI_ISL_417955	2020_03	29780	21
G	hCoV-19/DRC/2120/2020	EPI_ISL_435163	2020_04	29760	267
G	hCoV-19/DRC/214/2020	EPI_ISL_420030	2020_03	29726	0
G	hCoV-19/DRC/2299/2020	EPI_ISL_436412	2020_04	29798	267
G	hCoV-19/DRC/236/2020	EPI_ISL_420032	2020_03	29748	0
G	hCoV-19/DRC/2363/2020	EPI_ISL_437194	2020_04	29799	267
G	hCoV-19/DRC/248/2020	EPI_ISL_420035	2020_03	29742	0
G	hCoV-19/DRC/2496/2020	EPI_ISL_437337	2020_04	29813	0
G	hCoV-19/DRC/2529/2020	EPI_ISL_437338	2020_04	29817	0
G	hCoV-19/DRC/253/2020	EPI_ISL_420838	2020_03	29775	144
G	hCoV-19/DRC/2536/2020	EPI_ISL_437339	2020_04	29817	0
G	hCoV-19/DRC/2580/2020	EPI_ISL_437341	2020_04	29798	169
G	hCoV-19/DRC/2827/2020	EPI_ISL_437348	2020_04	29817	0
G	hCoV-19/DRC/2855/2020	EPI_ISL_437350	2020_04	29812	0
G	hCoV-19/DRC/2864/2020	EPI_ISL_437351	2020_04	29799	64
G	hCoV-19/DRC/2904/2020	EPI_ISL_437352	2020_04	29817	0
G	hCoV-19/DRC/2939/2020	EPI_ISL_437354	2020_04	29839	61
G	hCoV-19/DRC/3041/2020	EPI_ISL_437356	2020_04	29813	124
G	hCoV-19/DRC/3070/2020	EPI_ISL_437357	2020_04	29803	164
G	hCoV-19/DRC/3089/2020	EPI_ISL_437358	2020_04	29803	39
G	hCoV-19/DRC/3440/2020	EPI_ISL_447597	2020_04	29689	272
G	hCoV-19/DRC/3451/2020	EPI_ISL_447598	2020_04	29701	276
G	hCoV-19/DRC/3453/2020	EPI_ISL_447599	2020_04	29673	275
G	hCoV-19/DRC/352/2020	EPI_ISL_420850	2020_03	29724	300
G	hCoV-19/DRC/353/2020	EPI_ISL_420843	2020_03	29835	412
G	hCoV-19/DRC/355/2020	EPI_ISL_420844	2020_03	29739	20
G	hCoV-19/DRC/3595/2020	EPI_ISL_447606	2020_04	29741	267
G	hCoV-19/DRC/3632/2020	EPI_ISL_447607	2020_04	29648	266
G	hCoV-19/DRC/3653/2020	EPI_ISL_447231	2020_04	29674	0
G	hCoV-19/DRC/3659/2020	EPI_ISL_447232	2020_04	29627	6
G	hCoV-19/DRC/3661/2020	EPI_ISL_447233	2020_04	29627	267
G	hCoV-19/DRC/3662/2020	EPI_ISL_447234	2020_04	29669	266
G	hCoV-19/DRC/3664/2020	EPI_ISL_447235	2020_04	29644	267
G	hCoV-19/DRC/3683/2020	EPI_ISL_447236	2020_04	29648	267
G	hCoV-19/DRC/3688/2020	EPI_ISL_447237	2020_04	29741	267
G	hCoV-19/DRC/376/2020	EPI_ISL_420851	2020_03	29762	234
G	hCoV-19/DRC/3768/2020	EPI_ISL_447239	2020_04	29673	276
G	hCoV-19/DRC/3778/2020	EPI_ISL_447240	2020_04	29826	267
G	hCoV-19/DRC/3827/2020	EPI_ISL_447245	2020_04	29648	265
G	hCoV-19/DRC/3829/2020	EPI_ISL_447246	2020_04	29627	284
G	hCoV-19/DRC/3837/2020	EPI_ISL_447248	2020_04	29664	267
G	hCoV-19/DRC/3841/2020	EPI_ISL_447249	2020_04	29758	273
G	hCoV-19/DRC/3842/2020	EPI_ISL_471396	2020_04	29798	0
G	hCoV-19/DRC/3846/2020	EPI_ISL_471397	2020_04	29842	0
G	hCoV-19/DRC/3937/2020	EPI_ISL_471398	2020_04	29799	0
G	hCoV-19/DRC/3947/2020	EPI_ISL_471400	2020_04	29826	0
G	hCoV-19/DRC/3949/2020	EPI_ISL_471401	2020_04	29817	247
G	hCoV-19/DRC/396/2020	EPI_ISL_420852	2020_03	29769	224
G	hCoV-19/DRC/397/2020	EPI_ISL_420845	2020_03	29827	41
G	hCoV-19/DRC/400/2020	EPI_ISL_420846	2020_03	29745	59
G	hCoV-19/DRC/4012/2020	EPI_ISL_471402	2020_04	29799	0
G	hCoV-19/DRC/402/2020	EPI_ISL_420853	2020_03	29333	937
G	hCoV-19/DRC/4020/2020	EPI_ISL_471403	2020_04	29816	0
G	hCoV-19/DRC/4026/2020	EPI_ISL_471404	2020_04	29835	134
G	hCoV-19/DRC/4060/2020	EPI_ISL_471405	2020_04	29800	59
G	hCoV-19/DRC/4075/2020	EPI_ISL_471406	2020_04	29815	267
G	hCoV-19/DRC/4084/2020	EPI_ISL_471407	2020_04	29798	30
G	hCoV-19/DRC/4132/2020	EPI_ISL_471408	2020_04	29802	0
G	hCoV-19/DRC/4141/2020	EPI_ISL_471409	2020_04	29801	0
G	hCoV-19/DRC/4145/2020	EPI_ISL_471410	2020_04	29800	0
G	hCoV-19/DRC/4194/2020	EPI_ISL_471414	2020_04	29800	0
G	hCoV-19/DRC/4284/2020	EPI_ISL_514115	2020_04	29666	267
G	hCoV-19/DRC/431/2020	EPI_ISL_420847	2020_03	29789	0
[truncated: 70,316 more rows]

## Sheet: Table S2
Table S2: List of human-and bat-CoV strains used in the analysis.
Host	Accession	Genus	Species
Human	MT438696	Alphacoronavirus	229E
Human	MT438697	Alphacoronavirus	229E
Human	MT438698	Alphacoronavirus	229E
Human	MT438699	Alphacoronavirus	229E
Human	MT438700	Alphacoronavirus	229E
Human	MN369046	Alphacoronavirus	229E
Human	MN306046	Alphacoronavirus	229E
Human	MF542265	Alphacoronavirus	229E
Human	KY983587	Alphacoronavirus	229E
Human	KY621348	Alphacoronavirus	229E
Human	KY967357	Alphacoronavirus	229E
Human	KY674914	Alphacoronavirus	229E
Human	KY674919	Alphacoronavirus	229E
Human	KY684760	Alphacoronavirus	229E
Human	KY369908	Alphacoronavirus	229E
Human	KY369909	Alphacoronavirus	229E
Human	KY369910	Alphacoronavirus	229E
Human	KY369911	Alphacoronavirus	229E
Human	KY369912	Alphacoronavirus	229E
Human	KY369913	Alphacoronavirus	229E
Human	KY369914	Alphacoronavirus	229E
Human	KU291448	Alphacoronavirus	229E
Human	KF514430	Alphacoronavirus	229E
Human	KF514432	Alphacoronavirus	229E
Human	KF514433	Alphacoronavirus	229E
Human	JX503060	Alphacoronavirus	229E
Human	JX503061	Alphacoronavirus	229E
Human	MN306018	Alphacoronavirus	NL63
Human	MN306040	Alphacoronavirus	NL63
Human	MK334043	Alphacoronavirus	NL63
Human	MK334044	Alphacoronavirus	NL63
Human	MK334045	Alphacoronavirus	NL63
Human	MK334046	Alphacoronavirus	NL63
Human	MK334047	Alphacoronavirus	NL63
Human	MG428699	Alphacoronavirus	NL63
Human	MG428701	Alphacoronavirus	NL63
Human	MG428702	Alphacoronavirus	NL63
Human	MG428703	Alphacoronavirus	NL63
Human	MG428704	Alphacoronavirus	NL63
Human	MG428705	Alphacoronavirus	NL63
Human	MG428706	Alphacoronavirus	NL63
Human	MG772808	Alphacoronavirus	NL63
Human	KY983586	Alphacoronavirus	NL63
Human	KY829118	Alphacoronavirus	NL63
Human	KY554967	Alphacoronavirus	NL63
Human	KY554968	Alphacoronavirus	NL63
Human	KY554969	Alphacoronavirus	NL63
Human	KY554970	Alphacoronavirus	NL63
Human	KY554971	Alphacoronavirus	NL63
Human	KY674915	Alphacoronavirus	NL63
Human	KY674916	Alphacoronavirus	NL63
Human	KX179494	Alphacoronavirus	NL63
Human	KX179495	Alphacoronavirus	NL63
Human	KX179496	Alphacoronavirus	NL63
Human	KX179497	Alphacoronavirus	NL63
Human	KX179498	Alphacoronavirus	NL63
Human	KX179499	Alphacoronavirus	NL63
Human	KX179500	Alphacoronavirus	NL63
Human	KU521535	Alphacoronavirus	NL63
Human	KT381875	Alphacoronavirus	NL63
Human	KT266906	Alphacoronavirus	NL63
Human	KF530104	Alphacoronavirus	NL63
Human	KF530105	Alphacoronavirus	NL63
Human	KF530106	Alphacoronavirus	NL63
Human	KF530107	Alphacoronavirus	NL63
Human	KF530108	Alphacoronavirus	NL63
Human	KF530109	Alphacoronavirus	NL63
Human	KF530110	Alphacoronavirus	NL63
Human	KF530111	Alphacoronavirus	NL63
Human	KF530112	Alphacoronavirus	NL63
Human	KF530113	Alphacoronavirus	NL63
Human	KF530114	Alphacoronavirus	NL63
Human	JX504050	Alphacoronavirus	NL63
Human	JX524171	Alphacoronavirus	NL63
Human	JX104161	Alphacoronavirus	NL63
Human	JQ765563	Alphacoronavirus	NL63
Human	JQ765564	Alphacoronavirus	NL63
Human	JQ765565	Alphacoronavirus	NL63
Human	JQ765566	Alphacoronavirus	NL63
Human	JQ765567	Alphacoronavirus	NL63
Human	JQ765568	Alphacoronavirus	NL63
Human	JQ765569	Alphacoronavirus	NL63
Human	JQ765570	Alphacoronavirus	NL63
Human	JQ765571	Alphacoronavirus	NL63
Human	JQ765572	Alphacoronavirus	NL63
Human	JQ765573	Alphacoronavirus	NL63
Human	JQ765574	Alphacoronavirus	NL63
Human	JQ765575	Alphacoronavirus	NL63
Human	MN306036	Betacoronavirus	OC43
Human	MN306041	Betacoronavirus	OC43
Human	MN306042	Betacoronavirus	OC43
Human	MN306043	Betacoronavirus	OC43
Human	MN306053	Betacoronavirus	OC43
Human	MN310476	Betacoronavirus	OC43
Human	MN310478	Betacoronavirus	OC43
Human	MN026164	Betacoronavirus	OC43
Human	MH121121	Betacoronavirus	OC43
Human	MG977451	Betacoronavirus	OC43
Human	MG977452	Betacoronavirus	OC43
Human	MF314143	Betacoronavirus	OC43
Human	KY014281	Betacoronavirus	OC43
Human	KY014282	Betacoronavirus	OC43
Human	MF374983	Betacoronavirus	OC43
Human	MF374984	Betacoronavirus	OC43
Human	MF374985	Betacoronavirus	OC43
Human	KY983583	Betacoronavirus	OC43
Human	KY983585	Betacoronavirus	OC43
Human	KY983588	Betacoronavirus	OC43
Human	KY967356	Betacoronavirus	OC43
Human	KY967358	Betacoronavirus	OC43
Human	KY967359	Betacoronavirus	OC43
Human	KY967360	Betacoronavirus	OC43
Human	KY967361	Betacoronavirus	OC43
Human	KY554972	Betacoronavirus	OC43
Human	KY554973	Betacoronavirus	OC43
Human	KY554974	Betacoronavirus	OC43
Human	KY554975	Betacoronavirus	OC43
Human	KY674917	Betacoronavirus	OC43
Human	KY674918	Betacoronavirus	OC43
Human	KY674920	Betacoronavirus	OC43
Human	KY684759	Betacoronavirus	OC43
Human	KX538964	Betacoronavirus	OC43
Human	KX538965	Betacoronavirus	OC43
Human	KX538966	Betacoronavirus	OC43
Human	KX538967	Betacoronavirus	OC43
Human	KX538968	Betacoronavirus	OC43
Human	KX538969	Betacoronavirus	OC43
Human	KX538970	Betacoronavirus	OC43
Human	KX538971	Betacoronavirus	OC43
Human	KX538972	Betacoronavirus	OC43
Human	KX538973	Betacoronavirus	OC43
Human	KX538974	Betacoronavirus	OC43
Human	KX538975	Betacoronavirus	OC43
Human	KX538976	Betacoronavirus	OC43
Human	KX538977	Betacoronavirus	OC43
Human	KX538978	Betacoronavirus	OC43
Human	KX538979	Betacoronavirus	OC43
Human	KY369905	Betacoronavirus	OC43
Human	KY369906	Betacoronavirus	OC43
Human	KY369907	Betacoronavirus	OC43
Human	KX344031	Betacoronavirus	OC43
Human	KU131570	Betacoronavirus	OC43
Human	KF923886	Betacoronavirus	OC43
Human	KF923887	Betacoronavirus	OC43
Human	KF923889	Betacoronavirus	OC43
Human	KF923890	Betacoronavirus	OC43
Human	KF923892	Betacoronavirus	OC43
Human	KF923893	Betacoronavirus	OC43
Human	KF923894	Betacoronavirus	OC43
Human	KF923895	Betacoronavirus	OC43
Human	KF923897	Betacoronavirus	OC43
Human	KF923898	Betacoronavirus	OC43
Human	KF923899	Betacoronavirus	OC43
Human	KF923901	Betacoronavirus	OC43
Human	KF923902	Betacoronavirus	OC43
Human	KF923903	Betacoronavirus	OC43
Human	KF923904	Betacoronavirus	OC43
Human	KF923905	Betacoronavirus	OC43
Human	KF923907	Betacoronavirus	OC43
Human	KF923908	Betacoronavirus	OC43
Human	KF923909	Betacoronavirus	OC43
Human	KF923910	Betacoronavirus	OC43
Human	KF923911	Betacoronavirus	OC43
Human	KF923912	Betacoronavirus	OC43
Human	KF923913	Betacoronavirus	OC43
Human	KF923914	Betacoronavirus	OC43
Human	KF923915	Betacoronavirus	OC43
Human	KF923916	Betacoronavirus	OC43
Human	KF923917	Betacoronavirus	OC43
Human	KF923918	Betacoronavirus	OC43
Human	KF923919	Betacoronavirus	OC43
Human	KF923920	Betacoronavirus	OC43
Human	KF923921	Betacoronavirus	OC43
Human	KF923922	Betacoronavirus	OC43
Human	KF923923	Betacoronavirus	OC43
Human	KF923924	Betacoronavirus	OC43
Human	KF923925	Betacoronavirus	OC43
Human	KF923888	Betacoronavirus	OC43
Human	KF923891	Betacoronavirus	OC43
Human	KF923896	Betacoronavirus	OC43
Human	KF923900	Betacoronavirus	OC43
Human	KF923906	Betacoronavirus	OC43
Human	KP198610	Betacoronavirus	OC43
Human	KP198611	Betacoronavirus	OC43
Human	KJ958218	Betacoronavirus	OC43
Human	KJ958219	Betacoronavirus	OC43
Human	KF530060	Betacoronavirus	OC43
Human	KF530061	Betacoronavirus	OC43
Human	KF530063	Betacoronavirus	OC43
Human	KF530064	Betacoronavirus	OC43
Human	KF530065	Betacoronavirus	OC43
Human	KF530066	Betacoronavirus	OC43
Human	KF530067	Betacoronavirus	OC43
Human	KF530068	Betacoronavirus	OC43
Human	KF530069	Betacoronavirus	OC43
Human	KF530070	Betacoronavirus	OC43
Human	KF530071	Betacoronavirus	OC43
Human	KF530072	Betacoronavirus	OC43
Human	KF530073	Betacoronavirus	OC43
Human	KF530074	Betacoronavirus	OC43
Human	KF530075	Betacoronavirus	OC43
Human	KF530076	Betacoronavirus	OC43
Human	KF530077	Betacoronavirus	OC43
Human	KF530078	Betacoronavirus	OC43
Human	KF530079	Betacoronavirus	OC43
Human	KF530080	Betacoronavirus	OC43
Human	KF530081	Betacoronavirus	OC43
Human	KF530082	Betacoronavirus	OC43
Human	KF530083	Betacoronavirus	OC43
Human	KF530084	Betacoronavirus	OC43
Human	KF530085	Betacoronavirus	OC43
Human	KF530086	Betacoronavirus	OC43
Human	KF530087	Betacoronavirus	OC43
Human	KF530088	Betacoronavirus	OC43
Human	KF530089	Betacoronavirus	OC43
Human	KF530090	Betacoronavirus	OC43
Human	KF530091	Betacoronavirus	OC43
Human	KF530092	Betacoronavirus	OC43
Human	KF530094	Betacoronavirus	OC43
Human	KF530095	Betacoronavirus	OC43
Human	KF530096	Betacoronavirus	OC43
Human	KF530097	Betacoronavirus	OC43
Human	KF530098	Betacoronavirus	OC43
Human	KF530099	Betacoronavirus	OC43
Human	JN129834	Betacoronavirus	OC43
Human	JN129835	Betacoronavirus	OC43
Human	NC_006577	Betacoronavirus	HKU1
Human	MK167038	Betacoronavirus	HKU1
Human	MH940245	Betacoronavirus	HKU1
Human	KY674921	Betacoronavirus	HKU1
Human	KY674941	Betacoronavirus	HKU1
Human	KY674942	Betacoronavirus	HKU1
Human	KY674943	Betacoronavirus	HKU1
Human	KT779555	Betacoronavirus	HKU1
Human	KT779556	Betacoronavirus	HKU1
Human	KF686340	Betacoronavirus	HKU1
Human	KF686341	Betacoronavirus	HKU1
Human	KF686342	Betacoronavirus	HKU1
Human	KF686343	Betacoronavirus	HKU1
Human	KF686344	Betacoronavirus	HKU1
Human	KF686346	Betacoronavirus	HKU1
Human	KF430201	Betacoronavirus	HKU1
Human	HM034837	Betacoronavirus	HKU1
Human	AY597011	Betacoronavirus	HKU1
Bat	MN611522	Alphacoronavirus	Rhinolophus affinis bat coronavirus HKU2-related
Bat	NC_028824	Alphacoronavirus	BtRf-AlphaCoV/YN2012
Bat	KJ473808	Alphacoronavirus	BtRf-AlphaCoV/YN2012
Bat	MH687952	Alphacoronavirus	Alphacoronavirus sp.
Bat	MH687960	Alphacoronavirus	Alphacoronavirus sp.
Bat	KJ473810	Alphacoronavirus	Alphacoronavirus BtMs-AlphaCoV/GS2013
Bat	NC_028814	Alphacoronavirus	Rhinolophus ferrumequinum alphacoronavirus HuB-2013
Bat	KJ473807	Alphacoronavirus	Rhinolophus ferrumequinum alphacoronavirus HuB-2013
Bat	MN611517	Alphacoronavirus	Rousettus aegyptiacus bat coronavirus 229E-related
Bat	MK720944	Alphacoronavirus	Tylonycteris bat coronavirus HKU33
Bat	KY073748	Alphacoronavirus	Human coronavirus 229E
Bat	MH687967	Alphacoronavirus	Alphacoronavirus sp.
Bat	MH687962	Alphacoronavirus	Alphacoronavirus sp.
Bat	MH687935	Alphacoronavirus	Alphacoronavirus sp.
Bat	NC_028833	Alphacoronavirus	Nyctalus velutinus alphacoronavirus SC-2013
Bat	KJ473809	Alphacoronavirus	Nyctalus velutinus alphacoronavirus SC-2013
Bat	KY073747	Alphacoronavirus	Human coronavirus 229E
Bat	MH938448	Alphacoronavirus	Alphacoronavirus Bat-CoV/P.kuhlii/Italy/206645-41/2011
Bat	MN611521	Alphacoronavirus	Scotophilus kuhlii bat coronavirus 512-related
Bat	NC_028811	Alphacoronavirus	Myotis ricketti alphacoronavirus Sax-2011
Bat	KJ473806	Alphacoronavirus	Myotis ricketti alphacoronavirus Sax-2011
Bat	MH687941	Alphacoronavirus	Alphacoronavirus sp.
Bat	NC_022103	Alphacoronavirus	Bat coronavirus CDPHE15
Bat	KF430219	Alphacoronavirus	Bat coronavirus CDPHE15
Bat	MH687958	Alphacoronavirus	Alphacoronavirus sp.
Bat	MH687956	Alphacoronavirus	Alphacoronavirus sp.
Bat	MH687965	Alphacoronavirus	Alphacoronavirus sp.
Bat	MN065811	Alphacoronavirus	Bat alphacoronavirus
Bat	NC_046964	Alphacoronavirus	Alphacoronavirus Bat-CoV/P.kuhlii/Italy/3398-19/2015
Bat	MH938449	Alphacoronavirus	Alphacoronavirus Bat-CoV/P.kuhlii/Italy/3398-19/2015
Bat	MK211371	Alphacoronavirus	Coronavirus BtSk-AlphaCoV/GX2018C
Bat	MH938450	Alphacoronavirus	Alphacoronavirus Bat-CoV/P.kuhlii/Italy/206679-3/2010
Bat	MH687950	Alphacoronavirus	Alphacoronavirus sp.
Bat	MH687961	Alphacoronavirus	Alphacoronavirus sp.
Bat	MN611525	Alphacoronavirus	Hipposideros pomona bat coronavirus CHB25
Bat	MH687959	Alphacoronavirus	Alphacoronavirus sp.
Bat	MH687963	Alphacoronavirus	Alphacoronavirus sp.
Bat	MH687940	Alphacoronavirus	Alphacoronavirus sp.
Bat	MH687946	Alphacoronavirus	Alphacoronavirus sp.
Bat	MH687957	Alphacoronavirus	Alphacoronavirus sp.
Bat	KY799179	Alphacoronavirus	Bat coronavirus CDPHE15
Bat	MK211370	Alphacoronavirus	Coronavirus BtSk-AlphaCoV/GX2018B
Bat	MH687936	Alphacoronavirus	Alphacoronavirus sp.
Bat	MH687949	Alphacoronavirus	Alphacoronavirus sp.
Bat	MH687964	Alphacoronavirus	Alphacoronavirus sp.
Bat	MH687944	Alphacoronavirus	Alphacoronavirus sp.
Bat	MH687955	Alphacoronavirus	Alphacoronavirus sp.
Bat	MH687945	Alphacoronavirus	Alphacoronavirus sp.
Bat	MH687937	Alphacoronavirus	Alphacoronavirus sp.
Bat	MK211372	Alphacoronavirus	Coronavirus BtSk-AlphaCoV/GX2018D
Bat	MH687943	Alphacoronavirus	Alphacoronavirus sp.
Bat	MH687954	Alphacoronavirus	Alphacoronavirus sp.
Bat	MH687934	Alphacoronavirus	Alphacoronavirus sp.
Bat	MH687948	Alphacoronavirus	Alphacoronavirus sp.
Bat	MK211369	Alphacoronavirus	Coronavirus BtSk-AlphaCoV/GX2018A
Bat	MH687939	Alphacoronavirus	Alphacoronavirus sp.
Bat	KJ473795	Alphacoronavirus	Bat coronavirus 1A
Bat	KJ473796	Alphacoronavirus	Bat coronavirus 1A
Bat	MH687951	Alphacoronavirus	Alphacoronavirus sp.
Bat	MN611524	Alphacoronavirus	Miniopterus schreibersii bat coronavirus 1-related
Bat	MH687942	Alphacoronavirus	Alphacoronavirus sp.
Bat	MH687938	Alphacoronavirus	Alphacoronavirus sp.
Bat	NC_032107	Alphacoronavirus	NL63-related bat coronavirus strain BtKYNL63-9b
Bat	KY073744	Alphacoronavirus	NL63-related bat coronavirus strain BtKYNL63-9b
Bat	MH687966	Alphacoronavirus	Alphacoronavirus sp.
Bat	KY073746	Alphacoronavirus	NL63-related bat coronavirus strain BtKYNL63-9b
Bat	JQ989266	Alphacoronavirus	Bat coronavirus HKU10
Bat	JQ989267	Alphacoronavirus	Bat coronavirus HKU10
Bat	JQ989268	Alphacoronavirus	Bat coronavirus HKU10
Bat	JQ989272	Alphacoronavirus	Bat coronavirus HKU10
Bat	JQ989273	Alphacoronavirus	Bat coronavirus HKU10
Bat	JQ989271	Alphacoronavirus	Bat coronavirus HKU10
Bat	JQ989269	Alphacoronavirus	Bat coronavirus HKU10
Bat	NC_018871	Alphacoronavirus	Bat coronavirus HKU10
Bat	JQ989270	Alphacoronavirus	Bat coronavirus HKU10
Bat	MN611523	Alphacoronavirus	Hipposideros pomona bat coronavirus HKU10-related
Bat	NC_048216	Alphacoronavirus	NL63-related bat coronavirus strain BtKYNL63-9b
Bat	KY073745	Alphacoronavirus	NL63-related bat coronavirus strain BtKYNL63-9b
Bat	KJ473800	Alphacoronavirus	Miniopterus bat coronavirus HKU8
Bat	MN611518	Alphacoronavirus	Miniopterus pusillus bat coronavirus HKU8-related
Bat	KJ473798	Alphacoronavirus	Miniopterus bat coronavirus HKU8
Bat	KJ473797	Alphacoronavirus	Miniopterus bat coronavirus HKU8
Bat	KJ473799	Alphacoronavirus	Miniopterus bat coronavirus HKU8
Bat	KJ473811	Betacoronavirus	Severe acute respiratory syndrome-related coronavirus
Bat	FJ588686	Betacoronavirus	Severe acute respiratory syndrome-related coronavirus
Bat	MT663548	Alphacoronavirus	Bat alphacoronavirus
Bat	EF065514	Betacoronavirus	Rousettus bat coronavirus HKU9
Bat	MK211373	Alphacoronavirus	Coronavirus BtRs-AlphaCoV/YN2018
Bat	HM211099	Betacoronavirus	Rousettus bat coronavirus HKU9
Bat	NC_009021	Betacoronavirus	Rousettus bat coronavirus HKU9
Bat	EF065513	Betacoronavirus	Rousettus bat coronavirus HKU9
Bat	HM211101	Betacoronavirus	Rousettus bat coronavirus HKU9
Bat	MG762674	Betacoronavirus	Rousettus bat coronavirus HKU9
Bat	HM211098	Betacoronavirus	Rousettus bat coronavirus HKU9
Bat	HM211100	Betacoronavirus	Rousettus bat coronavirus HKU9
Bat	EF065515	Betacoronavirus	Rousettus bat coronavirus HKU9
Bat	KJ473816	Betacoronavirus	Severe acute respiratory syndrome-related coronavirus
Bat	EF065516	Betacoronavirus	Rousettus bat coronavirus HKU9
Bat	KJ473815	Betacoronavirus	Severe acute respiratory syndrome-related coronavirus
Bat	MK720945	Alphacoronavirus	Rhinolophus bat coronavirus HKU32
Bat	MK720946	Alphacoronavirus	Rhinolophus bat coronavirus HKU32
Bat	KY352407	Betacoronavirus	Severe acute respiratory syndrome-related coronavirus
Bat	NC_014470	Betacoronavirus	Bat coronavirus BM48-31/BGR/2008
Bat	GU190215	Betacoronavirus	Bat coronavirus BM48-31/BGR/2008
Bat	KJ473812	Betacoronavirus	Severe acute respiratory syndrome-related coronavirus
Bat	JX993988	Betacoronavirus	Severe acute respiratory syndrome-related coronavirus
Bat	KJ473813	Betacoronavirus	Severe acute respiratory syndrome-related coronavirus
Bat	JX993987	Betacoronavirus	Severe acute respiratory syndrome-related coronavirus
Bat	MK211374	Betacoronavirus	Coronavirus BtRl-BetaCoV/SC2018
Bat	KJ473814	Betacoronavirus	Severe acute respiratory syndrome-related coronavirus
Bat	MK211377	Betacoronavirus	Coronavirus BtRs-BetaCoV/YN2018C
Bat	MK211375	Betacoronavirus	Coronavirus BtRs-BetaCoV/YN2018A
Bat	DQ412042	Betacoronavirus	Severe acute respiratory syndrome-related coronavirus
Bat	KY417145	Betacoronavirus	Severe acute respiratory syndrome-related coronavirus
Bat	KU973692	Betacoronavirus	Severe acute respiratory syndrome-related coronavirus
Bat	KP886808	Betacoronavirus	Severe acute respiratory syndrome-related coronavirus
Bat	KP886809	Betacoronavirus	Severe acute respiratory syndrome-related coronavirus
Bat	KY417142	Betacoronavirus	Severe acute respiratory syndrome-related coronavirus
Bat	MG772934	Betacoronavirus	Severe acute respiratory syndrome-related coronavirus
Bat	DQ071615	Betacoronavirus	Severe acute respiratory syndrome-related coronavirus
Bat	KY417143	Betacoronavirus	Severe acute respiratory syndrome-related coronavirus
Bat	KY417147	Betacoronavirus	Severe acute respiratory syndrome-related coronavirus
Bat	KY417148	Betacoronavirus	Severe acute respiratory syndrome-related coronavirus
Bat	KY417149	Betacoronavirus	Severe acute respiratory syndrome-related coronavirus
Bat	DQ412043	Betacoronavirus	Severe acute respiratory syndrome-related coronavirus
Bat	MK211379	Betacoronavirus	Coronavirus BtRt-BetaCoV/GX2018
Bat	KY417152	Betacoronavirus	Severe acute respiratory syndrome-related coronavirus
Bat	KY417144	Betacoronavirus	Severe acute respiratory syndrome-related coronavirus
Bat	KY417146	Betacoronavirus	Severe acute respiratory syndrome-related coronavirus
Bat	KC881005	Betacoronavirus	Severe acute respiratory syndrome-related coronavirus
Bat	KC881006	Betacoronavirus	Severe acute respiratory syndrome-related coronavirus
Bat	MG772933	Betacoronavirus	Severe acute respiratory syndrome-related coronavirus
Bat	KF569996	Betacoronavirus	Severe acute respiratory syndrome-related coronavirus
Bat	MN996532	Betacoronavirus	Severe acute respiratory syndrome-related coronavirus
Bat	MF593268	Betacoronavirus	Middle East respiratory syndrome-related coronavirus
Bat	MG596803	Betacoronavirus	Middle East respiratory syndrome-related coronavirus
Bat	MG596802	Betacoronavirus	Middle East respiratory syndrome-related coronavirus
Bat	KC869678	Betacoronavirus	Middle East respiratory syndrome-related coronavirus
Bat	NC_030886	Betacoronavirus	Rousettus bat coronavirus GCCDC1
Bat	KU762338	Betacoronavirus	Rousettus bat coronavirus GCCDC1
Bat	MT350598	Betacoronavirus	Rousettus bat coronavirus GCCDC1
Bat	MK211378	Betacoronavirus	Coronavirus BtRs-BetaCoV/YN2018D
Bat	MN611519	Betacoronavirus	Tylonycteris pachypus bat coronavirus HKU4-related
Bat	KJ473822	Betacoronavirus	Tylonycteris bat coronavirus HKU4
Bat	MK211376	Betacoronavirus	Coronavirus BtRs-BetaCoV/YN2018B
Bat	NC_009019	Betacoronavirus	Tylonycteris bat coronavirus HKU4
Bat	EF065505	Betacoronavirus	Tylonycteris bat coronavirus HKU4
Bat	EF065506	Betacoronavirus	Tylonycteris bat coronavirus HKU4
Bat	EF065507	Betacoronavirus	Tylonycteris bat coronavirus HKU4
Bat	KT444582	Betacoronavirus	SARS-like coronavirus WIV16
Bat	KY417151	Betacoronavirus	Severe acute respiratory syndrome-related coronavirus
Bat	KF367457	Betacoronavirus	Severe acute respiratory syndrome-related coronavirus
Bat	KY417150	Betacoronavirus	Severe acute respiratory syndrome-related coronavirus
Bat	EF065508	Betacoronavirus	Tylonycteris bat coronavirus HKU4
Bat	KJ473821	Betacoronavirus	Middle East respiratory syndrome-related coronavirus
Bat	KJ473820	Betacoronavirus	Pipistrellus bat coronavirus HKU5
Bat	NC_009020	Betacoronavirus	Pipistrellus bat coronavirus HKU5
Bat	EF065509	Betacoronavirus	Pipistrellus bat coronavirus HKU5
Bat	EF065512	Betacoronavirus	Pipistrellus bat coronavirus HKU5
Bat	EF065510	Betacoronavirus	Pipistrellus bat coronavirus HKU5
Bat	EF065511	Betacoronavirus	Pipistrellus bat coronavirus HKU5
Bat	KX442565	Betacoronavirus	Hypsugo bat coronavirus HKU25
Bat	KX442564	Betacoronavirus	Hypsugo bat coronavirus HKU25
Bat	MN611520	Betacoronavirus	Pipistrellus abramus bat coronavirus HKU5-related
Bat	NC_025217	Betacoronavirus	Bat Hp-betacoronavirus Zhejiang2013
Bat	KF636752	Betacoronavirus	Bat Hp-betacoronavirus Zhejiang2013

## Sheet: table S3 
Tabls S2 Number of SARS-CoV-2 strains in each clade isolated in each elapsed month.
	G	GH	GR	L	S	V	O
2019_12	0	0	0	21	1	0	0
2020_01	12	0	0	208	159	4	71
2020_02	79	34	55	213	209	126	250
2020_03	5670	6313	4821	1567	2850	2192	1036
2020_04	5559	5342	6958	651	881	924	777
2020_05	2070	2934	3463	78	206	54	339
2020_06	866	1492	2818	15	89	24	186
2020_07	784	840	5107	4	9	2	78
2020_08	791	629	2256	0	3	1	28
2020_09	56	55	49	0	0	0	5
	15887	17639	25527	2757	4407	3327	2770	72314

## Sheet: Table S4 
Table S4: Average oligonucleotide frequency for SARS-CoV-2 strains in each clade isolated in each elapsed month.
	Clade_G									Clade_GH								Clade_GR								Clade_L							Clade_V					Clade_S
elapsed month	1	2	3	4	5	6	7	8	9	2	3	4	5	6	7	8	9	2	3	4	5	6	7	8	9	0	1	2	3	4	5	6	2	3	4	5	6	1	2	3	4	5	6
A	0.298658	0.298583	0.298574	0.298589	0.298583	0.298576	0.298657	0.298634	0.29858	0.298634	0.298582	0.29859	0.298569	0.298566	0.298574	0.298588	0.298598	0.298654	0.298651	0.29869	0.298664	0.298645	0.298622	0.298658	0.298692	0.29862	0.298619	0.29864	0.298634	0.298667	0.298623	0.29851	0.298636	0.298594	0.298647	0.298584	0.29872	0.298626	0.298629	0.298616	0.298624	0.298631	0.298644
C	0.183718	0.183765	0.183678	0.183662	0.183633	0.183644	0.183568	0.183548	0.18355	0.183636	0.183674	0.183663	0.183656	0.183626	0.183602	0.1835	0.183406	0.183804	0.183747	0.183736	0.18369	0.183707	0.183694	0.183614	0.183616	0.183867	0.183856	0.183826	0.183814	0.183781	0.183738	0.183694	0.183822	0.183787	0.183764	0.18369	0.183681	0.183842	0.183828	0.183731	0.18373	0.183793	0.183801
G	0.196363	0.196352	0.196398	0.196419	0.196403	0.196364	0.196257	0.196318	0.19633	0.196307	0.196352	0.196356	0.196356	0.196297	0.196292	0.196322	0.196331	0.19625	0.196299	0.196297	0.196285	0.196229	0.196217	0.19629	0.196238	0.196318	0.196309	0.196328	0.196347	0.196353	0.196366	0.196331	0.196223	0.196323	0.196321	0.196341	0.196213	0.196307	0.196339	0.196361	0.196359	0.196285	0.196276
T	0.32126	0.321301	0.321351	0.32133	0.321381	0.321415	0.321519	0.3215	0.32154	0.321423	0.321391	0.321391	0.32142	0.321511	0.321531	0.321589	0.321665	0.321291	0.321303	0.321277	0.32136	0.321418	0.321466	0.321438	0.321454	0.321194	0.321216	0.321206	0.321204	0.3212	0.321273	0.321466	0.321319	0.321297	0.321267	0.321385	0.321386	0.321225	0.321204	0.321291	0.321287	0.321291	0.321279
AA	0.0953698	0.0953491	0.095324	0.0953459	0.0953439	0.0953404	0.0954027	0.0953716	0.0953181	0.0953487	0.0953273	0.095337	0.0953282	0.0953174	0.0953189	0.0953202	0.0953217	0.0954125	0.0953962	0.0954327	0.0953979	0.0953877	0.0953799	0.0953838	0.0954214	0.0953146	0.0953361	0.0953479	0.0953373	0.0953631	0.0953248	0.0952433	0.0953519	0.0953151	0.0953628	0.0953158	0.0954753	0.0953507	0.0953455	0.0953293	0.0953269	0.0953614	0.0953816
AC	0.067722	0.0677466	0.0677275	0.0677336	0.067718	0.0677171	0.0677472	0.0677025	0.0676869	0.0676948	0.0677032	0.0676967	0.0676988	0.0676844	0.0676918	0.0676602	0.067626	0.0677648	0.0677659	0.0677789	0.0677557	0.0677441	0.0677259	0.0677267	0.0677318	0.0677193	0.0677291	0.067723	0.0677517	0.067748	0.0677217	0.0677296	0.067701	0.0676875	0.0676966	0.0676732	0.067695	0.0677286	0.067734	0.0677045	0.0677047	0.0677367	0.0677359
AG	0.0583235	0.0582813	0.0582883	0.0582954	0.0582795	0.058267	0.0582256	0.0582589	0.0582655	0.0582754	0.0582662	0.0582731	0.0582621	0.0582516	0.0582522	0.0582554	0.0582621	0.0582751	0.0582772	0.0582849	0.0582699	0.0582544	0.0582332	0.0582835	0.0582721	0.0583273	0.0583001	0.0583074	0.0583134	0.0583218	0.0583157	0.0582342	0.0583088	0.0583209	0.0583349	0.058295	0.0582642	0.0582948	0.0583173	0.058305	0.058313	0.058275	0.0582929
AT	0.0772548	0.0772173	0.0772447	0.0772271	0.077255	0.0772636	0.0772915	0.0773108	0.0773232	0.0773245	0.0772975	0.0772947	0.0772916	0.077324	0.0773226	0.0773638	0.077404	0.0772143	0.0772206	0.0772077	0.0772532	0.0772703	0.0772931	0.0772734	0.0772813	0.0772693	0.0772658	0.0772698	0.0772426	0.0772474	0.0772747	0.0773213	0.0772858	0.0772799	0.0772659	0.0773124	0.0772953	0.0772685	0.0772441	0.0772879	0.077291	0.0772681	0.0772441
CA	0.0697857	0.0697713	0.0697668	0.0697507	0.0697342	0.0697464	0.0697717	0.0697434	0.0697277	0.0697423	0.0697619	0.0697386	0.0697304	0.0697148	0.0697186	0.0697066	0.069691	0.069756	0.0697675	0.0697546	0.0697516	0.0697497	0.0697395	0.0697391	0.0697427	0.0697614	0.0697661	0.0697577	0.0697627	0.0697472	0.0697365	0.0697759	0.0697555	0.0697642	0.0697506	0.0697407	0.069755	0.0698023	0.0697946	0.0697908	0.0697846	0.069794	0.0697718
CC	0.0296524	0.029648	0.0295949	0.0295824	0.0295781	0.0295814	0.0295543	0.0295517	0.029547	0.029627	0.0295865	0.0295923	0.0295874	0.0295889	0.0295732	0.0295249	0.0294676	0.029671	0.0296014	0.029591	0.0295826	0.029613	0.0296103	0.0295316	0.0295544	0.0297124	0.0296752	0.029673	0.029636	0.0296245	0.0296225	0.0295019	0.0296946	0.0296237	0.0296073	0.0295798	0.0295851	0.029648	0.0296471	0.0295984	0.0295952	0.0296226	0.0296543
CG	0.0146303	0.0146851	0.0146664	0.0146736	0.0146676	0.0146728	0.0146054	0.0146152	0.014641	0.0146444	0.0146748	0.0146755	0.0146737	0.0146691	0.0146619	0.0146519	0.0146403	0.0147124	0.0147154	0.014717	0.0147061	0.0147015	0.0146942	0.0146926	0.0147022	0.0146999	0.0147036	0.0147033	0.0147213	0.0147143	0.0147099	0.014723	0.0147035	0.0147358	0.0147315	0.0147255	0.0146768	0.0146979	0.0146951	0.0146942	0.0146974	0.0146827	0.0146868
CT	0.0696346	0.0696566	0.0696356	0.0696352	0.0696318	0.0696279	0.0696269	0.0696199	0.0696183	0.0696039	0.069634	0.0696376	0.0696479	0.069638	0.0696341	0.0696024	0.0695866	0.0696517	0.0696482	0.0696515	0.0696278	0.069624	0.0696452	0.0696269	0.0695993	0.0696768	0.0696968	0.069677	0.0696781	0.0696692	0.0696464	0.0696794	0.0696485	0.0696485	0.069654	0.0696212	0.0696554	0.0696712	0.0696732	0.0696316	0.0696319	0.0696759	0.0696619
GA	0.0539388	0.0539119	0.0539275	0.0539274	0.0539161	0.0539038	0.0538864	0.0539151	0.053937	0.0538875	0.0538969	0.0538987	0.0538811	0.0538769	0.0538711	0.0538633	0.053862	0.0539286	0.0539412	0.0539456	0.053929	0.0539246	0.0539169	0.0539007	0.0539131	0.0539687	0.0539559	0.0539661	0.0539698	0.053978	0.0539481	0.0538926	0.0539654	0.053968	0.0539831	0.0539344	0.0539282	0.0539627	0.0539677	0.0539541	0.0539633	0.053948	0.0539645
GC	0.0391405	0.0391345	0.0391445	0.0391543	0.0391462	0.0391341	0.0390927	0.0391155	0.0390994	0.0391212	0.0391358	0.0391365	0.0391394	0.0391126	0.0391076	0.0391269	0.0391143	0.0391304	0.0391552	0.0391565	0.039141	0.0391076	0.0391024	0.0391512	0.0391081	0.0391348	0.0391296	0.0391303	0.039137	0.0391369	0.0391316	0.0391633	0.0391209	0.0391712	0.0391705	0.0391766	0.0391504	0.0390889	0.0390961	0.0391041	0.039096	0.0390814	0.0390707
GG	0.0366182	0.0366267	0.0366358	0.0366501	0.0366418	0.0366199	0.0365847	0.0366034	0.036598	0.0366297	0.0366234	0.0366359	0.0366363	0.036602	0.0366108	0.0366024	0.0365997	0.0365139	0.0365257	0.0365326	0.0365151	0.0364991	0.036478	0.0365122	0.0364926	0.0365822	0.0365744	0.0365836	0.0365879	0.0365894	0.0365858	0.0365717	0.0365521	0.0365709	0.0365798	0.0365708	0.0365477	0.0365731	0.0365904	0.0365857	0.0365841	0.0365776	0.0365753
GT	0.0666621	0.0666777	0.0666901	0.0666883	0.0667012	0.066707	0.0666851	0.0666842	0.0666915	0.0666693	0.0666958	0.0666862	0.0667007	0.0667058	0.0667007	0.06673	0.0667502	0.0666729	0.0666777	0.0666658	0.0667037	0.0667007	0.0667182	0.0667313	0.0667222	0.0666344	0.0666448	0.066648	0.0666552	0.0666531	0.0666976	0.0666998	0.0665853	0.066614	0.0665916	0.0666655	0.0665885	0.0666755	0.0666827	0.0667175	0.0667172	0.0666809	0.0666715
TA	0.0795506	0.0795386	0.0795398	0.0795456	0.0795755	0.0795721	0.0795833	0.0795866	0.079584	0.0796431	0.0795855	0.0796015	0.0796167	0.0796476	0.0796529	0.0796794	0.0796981	0.079544	0.0795293	0.0795362	0.0795708	0.079572	0.0795727	0.0796121	0.079608	0.0795587	0.0795504	0.0795573	0.0795443	0.079557	0.0795912	0.0795739	0.0795549	0.0795267	0.0795275	0.0795731	0.0795503	0.0795043	0.0795141	0.0795316	0.079536	0.079517	0.0795234
TC	0.047205	0.0472391	0.0472135	0.0471977	0.0471949	0.0472162	0.0471797	0.0471857	0.0472235	0.0471953	0.0472505	0.0472408	0.0472334	0.0472424	0.0472329	0.0471944	0.0472132	0.0472389	0.0472287	0.047216	0.0472175	0.0472457	0.0472555	0.0472109	0.047223	0.0473047	0.0473213	0.0473027	0.0472929	0.047277	0.0472734	0.0473033	0.0473071	0.0473097	0.0472974	0.047265	0.0472601	0.0473756	0.0473516	0.047324	0.0473342	0.047354	0.0473447
TG	0.0867988	0.0867628	0.0868123	0.0868046	0.08682	0.0868097	0.0868482	0.0868483	0.0868316	0.0867612	0.0867913	0.0867754	0.086786	0.0867776	0.0867725	0.0868194	0.0868442	0.0867529	0.0867859	0.086769	0.0868021	0.0867802	0.0868174	0.0868087	0.0867745	0.0867156	0.0867341	0.0867368	0.0867305	0.0867334	0.0867625	0.0868076	0.0866615	0.0867007	0.0866805	0.0867603	0.0867345	0.0867434	0.0867414	0.0867809	0.0867697	0.0867578	0.0867252
TT	0.107713	0.107754	0.107788	0.107788	0.107796	0.10782	0.107915	0.107887	0.107908	0.107832	0.107769	0.10778	0.107786	0.107847	0.107878	0.107899	0.107919	0.107761	0.107764	0.10776	0.107776	0.107825	0.107818	0.107815	0.107853	0.10762	0.107617	0.107616	0.107639	0.10764	0.107658	0.107779	0.107803	0.107763	0.107766	0.107791	0.107838	0.107614	0.107605	0.10766	0.107655	0.107667	0.107696
AAA	0.0299	0.0298618	0.029861	0.0298713	0.0298774	0.0298741	0.0299124	0.0299119	0.0298591	0.029873	0.029869	0.0298659	0.0298678	0.0298605	0.0298672	0.0298736	0.0298899	0.0298972	0.0298966	0.0299082	0.0299047	0.0298919	0.0298959	0.0299193	0.0299138	0.0298443	0.0298668	0.029878	0.0298647	0.029877	0.029872	0.0298252	0.0298757	0.0298425	0.0298586	0.0298636	0.0298798	0.0298764	0.0298693	0.0298691	0.0298542	0.0298666	0.0298666
AAC	0.0205567	0.020584	0.020527	0.0205267	0.0205297	0.020546	0.0205543	0.0205229	0.0205323	0.0205529	0.0205476	0.0205499	0.0205454	0.0205555	0.0205482	0.0205247	0.0205222	0.0206126	0.0205717	0.0205736	0.0205767	0.0205964	0.0205763	0.0205603	0.0205802	0.0205731	0.0205762	0.0205696	0.020555	0.0205503	0.0205533	0.0205447	0.020579	0.0205252	0.0205236	0.0205226	0.0206278	0.020575	0.0205772	0.0205341	0.0205443	0.0205741	0.0206133
AAG	0.0194299	0.0194286	0.0194483	0.0194526	0.0194411	0.0194278	0.0194571	0.0194328	0.0194147	0.0194342	0.019432	0.0194328	0.0194284	0.0194178	0.0194234	0.0194239	0.0194263	0.0194329	0.0194432	0.0194535	0.019428	0.019424	0.01944	0.0194277	0.0194459	0.0194229	0.019418	0.0194201	0.0194446	0.0194523	0.0194365	0.0194273	0.0194162	0.0194628	0.0194799	0.0194494	0.0194987	0.019423	0.0194244	0.0194381	0.0194378	0.0194311	0.0194183
AAT	0.025487	0.0254779	0.0254914	0.0254997	0.0254995	0.0254958	0.0254816	0.0255066	0.0255172	0.0254919	0.025482	0.0254923	0.0254901	0.0254872	0.0254832	0.0255009	0.0254864	0.0254709	0.0254873	0.0255018	0.0254923	0.025479	0.0254705	0.0254779	0.0254852	0.0254776	0.0254787	0.025483	0.0254761	0.0254881	0.0254672	0.025452	0.0254835	0.0254875	0.0255056	0.0254844	0.0254732	0.0254824	0.0254796	0.0254917	0.0254947	0.0254928	0.0254869
ACA	0.0271006	0.0270757	0.0270837	0.0270803	0.0270737	0.0270781	0.0271122	0.0270919	0.0270855	0.0270579	0.0270788	0.0270672	0.027068	0.0270649	0.0270741	0.027067	0.0270886	0.0270613	0.0270794	0.0270763	0.0270818	0.0270755	0.0270683	0.0270763	0.0270884	0.027065	0.0270667	0.0270671	0.0270815	0.0270789	0.027083	0.0271036	0.0270633	0.0270768	0.0270716	0.0270812	0.0270791	0.0270714	0.0270778	0.0270859	0.0270783	0.0270619	0.0270471
ACC	0.0125477	0.012542	0.0125091	0.0125045	0.0125059	0.012511	0.0125183	0.0124788	0.0124387	0.0125219	0.0124915	0.0124903	0.0124931	0.0124933	0.0124901	0.0124779	0.012461	0.0125423	0.01251	0.0125042	0.0125048	0.0125117	0.0125129	0.0124803	0.0124927	0.0125736	0.0125676	0.0125653	0.0125446	0.0125389	0.0125391	0.0124915	0.0125726	0.0125288	0.0125225	0.0125238	0.0125073	0.0125661	0.0125685	0.0125395	0.0125406	0.0125655	0.0125836
ACG	0.00547823	0.00549608	0.00549519	0.00549938	0.00549898	0.00549679	0.00547664	0.00548962	0.00550053	0.00548321	0.00549722	0.00549712	0.0054981	0.00549402	0.00549205	0.00549241	0.00548954	0.00552992	0.00552942	0.00553336	0.00553307	0.00552454	0.0055163	0.00553522	0.00553009	0.0054915	0.00549526	0.00549496	0.00550256	0.00550194	0.00550093	0.00551095	0.00549301	0.00549799	0.0054997	0.00549809	0.00551737	0.00549252	0.0054916	0.00548873	0.00548933	0.00548579	0.00548822
ACT	0.0225898	0.0226286	0.0226363	0.0226473	0.0226357	0.0226251	0.02264	0.0226448	0.0226565	0.0226144	0.022627	0.0226319	0.0226339	0.0226234	0.0226276	0.0226239	0.0225911	0.0226212	0.0226449	0.0226631	0.0226324	0.0226215	0.0226286	0.0226368	0.0226187	0.0225691	0.022586	0.0225814	0.0226208	0.0226244	0.0225904	0.0226248	0.0225531	0.0225833	0.0226036	0.022565	0.0225912	0.0225824	0.0225799	0.0225816	0.0225842	0.0226071	0.0225916
AGA	0.0202744	0.0202551	0.020273	0.0202764	0.0202659	0.0202545	0.0202679	0.0202734	0.0202613	0.0202245	0.0202313	0.0202338	0.0202279	0.0202191	0.0202178	0.0202332	0.0202345	0.0202674	0.0202771	0.0202872	0.0202703	0.0202586	0.0202586	0.0202728	0.020269	0.0202557	0.0202592	0.0202579	0.0202775	0.0202835	0.0202622	0.0202193	0.0202586	0.0202738	0.0202886	0.0202535	0.0202785	0.0202596	0.0202657	0.0202655	0.0202733	0.0202649	0.0202621
AGC	0.0100756	0.0100669	0.0100605	0.0100593	0.010058	0.0100602	0.0100359	0.0100553	0.0100632	0.0100757	0.0100738	0.010075	0.0100743	0.0100717	0.0100677	0.0100531	0.0100494	0.0100733	0.0100741	0.0100718	0.0100677	0.0100582	0.0100493	0.010077	0.0100635	0.010088	0.0100768	0.0100759	0.0100707	0.0100714	0.0100663	0.0100727	0.0100746	0.0100693	0.010069	0.0100654	0.0100684	0.0100418	0.0100497	0.0100446	0.0100428	0.0100416	0.0100456
AGG	0.0109593	0.0109713	0.0109547	0.0109577	0.010953	0.0109501	0.0109198	0.0109302	0.0109423	0.0109843	0.0109651	0.0109737	0.0109686	0.0109594	0.0109653	0.0109415	0.0109388	0.0109451	0.0109295	0.0109328	0.0109219	0.0109298	0.01091	0.0109053	0.0109169	0.0109894	0.010971	0.0109788	0.0109678	0.0109684	0.0109661	0.0109275	0.0109882	0.0109692	0.0109758	0.0109612	0.0109688	0.0109675	0.010984	0.0109614	0.0109672	0.0109652	0.0109825
AGT	0.0170053	0.0169866	0.0169967	0.0170001	0.0170003	0.0170003	0.016992	0.0169949	0.0169972	0.0169909	0.016994	0.0169889	0.0169896	0.0170008	0.0169983	0.0170267	0.0170429	0.0169875	0.0169948	0.0169942	0.0170098	0.0170059	0.0170108	0.0170292	0.0170187	0.0169946	0.0169878	0.0169907	0.0169969	0.0169982	0.0170175	0.0170017	0.016989	0.0170064	0.0170023	0.0170158	0.0169475	0.0170196	0.0170145	0.0170311	0.0170292	0.0170025	0.0170037
ATA	0.0157581	0.0157572	0.0157649	0.0157624	0.0157748	0.015777	0.0157953	0.0157855	0.0157683	0.0158266	0.0157958	0.0157995	0.0158003	0.0158122	0.0158128	0.0158265	0.0158212	0.0157539	0.015755	0.015751	0.0157629	0.0157714	0.0157803	0.0157762	0.0157746	0.0157661	0.0157636	0.0157674	0.015754	0.0157546	0.0157727	0.0157608	0.0157609	0.0157487	0.0157478	0.0157611	0.0157709	0.0157639	0.0157554	0.0157512	0.015753	0.0157712	0.0157593
ATC	0.0113424	0.011352	0.0113406	0.0113397	0.0113406	0.0113465	0.0113088	0.0113337	0.0113537	0.0113505	0.0113754	0.0113776	0.0113716	0.0113723	0.0113644	0.0113708	0.0113847	0.011349	0.0113486	0.0113505	0.0113531	0.0113661	0.0113597	0.0113484	0.011346	0.0113483	0.0113549	0.0113484	0.0113502	0.0113503	0.011337	0.0113426	0.0113533	0.0113661	0.01137	0.0113369	0.0113095	0.011349	0.0113453	0.0113405	0.0113483	0.0113478	0.0113427
ATG	0.0242538	0.0242224	0.0242436	0.0242316	0.0242433	0.0242466	0.0242713	0.0242554	0.0242561	0.0242495	0.0242416	0.0242331	0.0242334	0.0242426	0.0242388	0.0242438	0.0242391	0.0242336	0.0242318	0.0242169	0.0242437	0.0242437	0.0242451	0.0242254	0.0242295	0.024281	0.0242725	0.0242721	0.0242429	0.0242418	0.024259	0.0242673	0.0242559	0.024257	0.0242406	0.0242864	0.0242868	0.0242799	0.0242768	0.0242911	0.0242863	0.0242728	0.0242685
ATT	0.0259037	0.0258825	0.0258952	0.0258951	0.025897	0.0258954	0.0259188	0.0259394	0.0259443	0.0259005	0.0258851	0.0258857	0.0258865	0.0258986	0.0259088	0.0259234	0.0259641	0.0258748	0.025886	0.0258914	0.0258947	0.0258895	0.0259004	0.0259258	0.02593	0.0258764	0.0258767	0.0258838	0.0258963	0.0259033	0.0259084	0.0259548	0.0259169	0.0259081	0.0259099	0.0259293	0.0259136	0.025879	0.0258674	0.0259041	0.0259042	0.0258774	0.0258761
CAA	0.0235043	0.0235163	0.0235024	0.0234975	0.0234866	0.0234941	0.0235266	0.023485	0.02348	0.0235016	0.0234968	0.0234987	0.0234915	0.0234824	0.0234783	0.0234594	0.0234542	0.0235125	0.0235065	0.0235108	0.0234906	0.0234975	0.0234867	0.0234555	0.0234844	0.0234944	0.0235045	0.0235025	0.0235007	0.0234952	0.0234725	0.0235023	0.0235068	0.0235046	0.0235158	0.0234771	0.0235322	0.0235133	0.0235096	0.0234831	0.0234863	0.0235142	0.0235029
CAC	0.0153889	0.0153897	0.0153926	0.0153944	0.0153867	0.0153864	0.0153669	0.015385	0.0153725	0.0153706	0.0153651	0.0153591	0.0153578	0.0153578	0.0153577	0.0153787	0.0153551	0.0153811	0.015394	0.0153949	0.0153897	0.0153785	0.0153657	0.0153854	0.0153832	0.0153768	0.0153818	0.0153803	0.0153951	0.0153908	0.0153743	0.0154042	0.015375	0.0153915	0.0153902	0.0153897	0.0153698	0.0154139	0.0154112	0.0154236	0.0154229	0.0154165	0.0154048
CAG	0.0146618	0.0146497	0.014654	0.0146524	0.0146498	0.0146482	0.0146415	0.0146442	0.0146179	0.0146128	0.0146256	0.0146205	0.0146217	0.0146107	0.014615	0.014595	0.0146081	0.0146557	0.0146553	0.0146516	0.0146551	0.0146478	0.014638	0.0146688	0.0146614	0.0146716	0.0146661	0.0146653	0.0146596	0.0146556	0.0146601	0.0146343	0.0146648	0.0146581	0.0146523	0.0146501	0.0146278	0.0146616	0.0146673	0.0146564	0.0146536	0.0146455	0.0146501
CAT	0.0162335	0.0162191	0.0162189	0.016208	0.0162137	0.01622	0.0162392	0.0162317	0.0162595	0.0162598	0.0162771	0.0162625	0.0162613	0.0162663	0.01627	0.0162761	0.0162781	0.0162126	0.0162126	0.0161993	0.0162184	0.0162279	0.0162516	0.016232	0.0162167	0.0162208	0.0162166	0.0162118	0.0162088	0.0162074	0.0162336	0.0162366	0.0162114	0.0162109	0.0161934	0.0162265	0.0162281	0.0162177	0.0162089	0.016229	0.0162237	0.0162197	0.0162166
CCA	0.0118094	0.0118177	0.0117842	0.0117664	0.0117758	0.0117907	0.0117881	0.0117647	0.0117585	0.0118262	0.0117985	0.0117936	0.0117919	0.0118058	0.0118003	0.0117653	0.0117274	0.0118327	0.0117816	0.0117616	0.0117799	0.0118086	0.0118039	0.0117576	0.0117785	0.0118397	0.0118244	0.0118208	0.0117777	0.0117679	0.011784	0.0117353	0.0118338	0.0117593	0.0117342	0.0117587	0.0118286	0.0117922	0.0118005	0.011766	0.0117649	0.0117881	0.0118117
CCC	0.00384511	0.00385739	0.00383454	0.00382411	0.00382847	0.00382976	0.0038205	0.00381569	0.00383392	0.00385022	0.00384195	0.00384419	0.00384074	0.0038442	0.00384003	0.0038044	0.00377984	0.00386737	0.00383291	0.00382431	0.00382641	0.00384503	0.00384761	0.00379553	0.00380554	0.00387691	0.00386004	0.00385735	0.00383022	0.0038227	0.00383351	0.00379436	0.00386733	0.00383169	0.00381905	0.00381964	0.00382036	0.00386147	0.00385678	0.00382997	0.00382388	0.00383955	0.00384563
CCG	0.00247201	0.00248437	0.00247797	0.00248215	0.00247898	0.00247571	0.00245231	0.00246404	0.002481	0.0024737	0.00248341	0.00248319	0.00247895	0.00247557	0.00247532	0.00247978	0.00248303	0.00247822	0.00248563	0.0024877	0.0024837	0.0024805	0.00248018	0.0024787	0.00248197	0.00247931	0.00248022	0.00248128	0.0024866	0.00248704	0.00248276	0.0024727	0.00247854	0.00249019	0.00249206	0.00248396	0.00246976	0.00248202	0.00247907	0.00248372	0.00248297	0.00247956	0.0024733
CCT	0.011513	0.0114873	0.0114864	0.011492	0.011481	0.0114775	0.011485	0.0114846	0.0114605	0.0114729	0.0114545	0.0114615	0.0114664	0.0114583	0.0114516	0.011458	0.0114476	0.0114894	0.0114874	0.0114982	0.0114767	0.0114737	0.0114731	0.0114722	0.0114714	0.0115175	0.0115088	0.0115111	0.0115267	0.0115256	0.0115088	0.0114841	0.0115138	0.0115277	0.0115401	0.0115021	0.011461	0.0115089	0.0115098	0.0115121	0.0115136	0.0115128	0.0115233
CGA	0.00315992	0.00318086	0.00316174	0.00316067	0.00316344	0.00317375	0.00314202	0.00314505	0.00317904	0.00315939	0.00317023	0.00316996	0.00316894	0.00317576	0.00317439	0.00316017	0.00315371	0.00321337	0.00320512	0.00319777	0.0032004	0.00320988	0.00321063	0.00319414	0.00319753	0.00317969	0.00317368	0.00317506	0.00316979	0.0031642	0.00316976	0.00314808	0.00317545	0.00317283	0.00316435	0.00316363	0.00316821	0.00317521	0.0031766	0.00316765	0.00317115	0.00317189	0.00318092
CGC	0.00324947	0.00325526	0.00325705	0.00325846	0.00325606	0.00325231	0.00324315	0.00325069	0.00325405	0.00325136	0.00325527	0.00325635	0.00325557	0.00324688	0.00324499	0.00325127	0.00323192	0.00325368	0.00325523	0.00326101	0.00325441	0.00324709	0.0032328	0.0032488	0.00324074	0.00324832	0.00325015	0.0032499	0.00325972	0.00325792	0.00325251	0.00325807	0.003254	0.003285	0.00328472	0.00329265	0.00327198	0.00325101	0.00324886	0.00325462	0.00325296	0.00324637	0.00324265
CGG	0.00254194	0.00255322	0.00254861	0.00255265	0.00254885	0.0025474	0.0025293	0.00254317	0.00254878	0.00254772	0.00254852	0.00254968	0.00255011	0.00254795	0.00254308	0.00255049	0.00254595	0.00254839	0.00255275	0.0025562	0.00255055	0.00254816	0.00254851	0.00254631	0.00254776	0.00254473	0.00254616	0.00254678	0.00255361	0.00255398	0.00255126	0.00256476	0.00251313	0.00251869	0.0025225	0.0025145	0.00250201	0.0025409	0.00254248	0.0025414	0.00254266	0.00254291	0.00254519
CGT	0.00567958	0.00569665	0.0056996	0.00570265	0.00570011	0.00569994	0.00569137	0.00567688	0.00566011	0.00568646	0.00570144	0.00570005	0.00569974	0.00569872	0.00570003	0.00568909	0.00571007	0.00569832	0.00570311	0.0057028	0.00570148	0.00569707	0.00570281	0.00570372	0.00571724	0.00572763	0.00573378	0.00573244	0.00573895	0.00573903	0.00573697	0.00575331	0.00576206	0.00576003	0.00576074	0.00575544	0.00573613	0.00573094	0.00572742	0.00573104	0.00573111	0.00572214	0.00571858
CTA	0.0187754	0.0187507	0.0187493	0.0187578	0.0187516	0.0187373	0.0187319	0.018749	0.0187548	0.0187148	0.0187356	0.0187404	0.0187437	0.0187308	0.0187328	0.0187383	0.0187587	0.0187355	0.0187496	0.0187633	0.0187538	0.0187319	0.0187274	0.018763	0.0187473	0.0187927	0.018798	0.0187954	0.0188201	0.018827	0.018806	0.018799	0.0187685	0.0187927	0.0188026	0.0187901	0.0187286	0.0187909	0.0187949	0.0187971	0.0188012	0.018787	0.0187852
CTC	0.0096002	0.00961137	0.00960579	0.00959953	0.00960263	0.00960246	0.00960919	0.00960316	0.00958939	0.00959503	0.00960788	0.00960286	0.00961088	0.00960916	0.00960957	0.0096004	0.00961025	0.00960959	0.00960486	0.00959754	0.0096019	0.0096069	0.00963035	0.00960361	0.009618	0.00960772	0.00961599	0.0096103	0.00960191	0.0095954	0.0096028	0.00961271	0.00961132	0.00960412	0.00959704	0.00960371	0.00964909	0.0096119	0.0096076	0.00959071	0.00959032	0.0095951	0.00958228
CTG	0.0165914	0.0165893	0.0165924	0.0165935	0.0165935	0.0165921	0.0165844	0.0165992	0.0165892	0.0165734	0.0165925	0.0165929	0.0165996	0.0165893	0.0165823	0.0165917	0.0166122	0.0165848	0.0165964	0.0165994	0.0165953	0.0165786	0.0165982	0.0166025	0.0165861	0.0165766	0.0165908	0.0165888	0.0166012	0.0166056	0.0165975	0.0166293	0.0165797	0.0165988	0.0165994	0.016609	0.0165815	0.0165825	0.0165759	0.0165665	0.0165684	0.0165815	0.0165595
CTT	0.0246675	0.0247074	0.0246886	0.0246833	0.0246846	0.0246971	0.0247028	0.0246701	0.0246859	0.024722	0.0246991	0.0247019	0.024694	0.0247097	0.0247101	0.0246734	0.0246056	0.0247228	0.0246963	0.0246876	0.0246778	0.0247077	0.0246912	0.0246599	0.0246502	0.0247006	0.0246938	0.0246833	0.0246534	0.0246404	0.0246405	0.0246398	0.0246899	0.0246515	0.0246497	0.0246184	0.0247019	0.0246891	0.0246968	0.0246789	0.0246734	0.0247123	0.0247375
GAA	0.0179254	0.0179204	0.0179282	0.0179398	0.0179296	0.0179174	0.0179213	0.0179201	0.0179158	0.0179165	0.0179214	0.0179299	0.0179194	0.0179097	0.0179067	0.0179097	0.017906	0.0179216	0.0179349	0.0179516	0.0179226	0.0179081	0.0178904	0.0179077	0.0179118	0.0179136	0.0179148	0.0179161	0.0179335	0.0179439	0.0179138	0.0178699	0.0179148	0.0179337	0.0179612	0.0179141	0.0179195	0.0179147	0.0179092	0.0179154	0.0179201	0.0179193	0.0179153
GAC	0.011376	0.0113721	0.0113805	0.0113824	0.0113743	0.0113706	0.0113675	0.0113665	0.0113657	0.0113782	0.0113816	0.0113794	0.0113782	0.0113693	0.0113702	0.0113623	0.0113651	0.0113734	0.0113792	0.0113876	0.0113748	0.0113652	0.0113503	0.0113693	0.0113618	0.0113803	0.0113775	0.0113809	0.0113835	0.011391	0.0113675	0.0113718	0.0113815	0.0113813	0.0113904	0.0113719	0.0113825	0.0113828	0.011383	0.0113753	0.0113751	0.0113808	0.0113766
GAG	0.00994703	0.00993398	0.00993079	0.00993416	0.00992668	0.00992589	0.00989242	0.00993255	0.00995882	0.00989796	0.00990042	0.00990494	0.00990157	0.00989518	0.00989197	0.00990006	0.00989059	0.00993844	0.00994458	0.00994504	0.00994252	0.00993283	0.00993148	0.00993806	0.00993329	0.00994437	0.00993096	0.00994016	0.0099421	0.00994432	0.00993966	0.00991335	0.0099386	0.00994087	0.00994264	0.00992701	0.00990287	0.00992927	0.00993952	0.00993062	0.00993374	0.00991645	0.00994174
GAT	0.0146926	0.0146888	0.0146905	0.0146738	0.0146884	0.0146923	0.0147068	0.0146986	0.014699	0.0146957	0.0146959	0.0146871	0.0146845	0.0147049	0.0147044	0.0146934	0.0147009	0.0146966	0.0146847	0.0146643	0.0146915	0.0147206	0.0147466	0.0146879	0.0147081	0.0147323	0.0147349	0.0147303	0.0147132	0.014702	0.0147269	0.0147422	0.0147313	0.0147147	0.0146911	0.0147244	0.0147246	0.014738	0.0147381	0.0147352	0.0147368	0.0147332	0.0147329
GCA	0.0124666	0.0124731	0.0124781	0.0124832	0.0124787	0.0124766	0.0124588	0.0124716	0.0124764	0.0124626	0.0124738	0.0124747	0.0124748	0.012459	0.0124588	0.012478	0.0124714	0.0124673	0.0124855	0.012489	0.0124761	0.0124604	0.0124572	0.0124826	0.0124667	0.0124668	0.0124714	0.0124695	0.0124774	0.0124768	0.0124737	0.0124804	0.0124603	0.012488	0.0124916	0.012484	0.0124722	0.0124688	0.012466	0.0124736	0.0124743	0.0124816	0.0124643
GCC	0.00627247	0.00626526	0.006276	0.00628198	0.00627301	0.00626576	0.00624618	0.0062823	0.00630001	0.00626582	0.0062708	0.00627522	0.00627495	0.00626666	0.00626346	0.00627043	0.00627325	0.00627	0.00628046	0.00628496	0.00627409	0.00626835	0.00627055	0.0062757	0.00627583	0.00626848	0.00625841	0.00626483	0.00628173	0.00628118	0.00627584	0.00625583	0.00626528	0.00628468	0.0062896	0.00627373	0.00629295	0.00623173	0.00623298	0.0062446	0.0062422	0.00623008	0.0062271
GCG	0.00295026	0.0029548	0.00295702	0.00295938	0.00295543	0.00295285	0.00295644	0.00294422	0.00293203	0.00295237	0.00295255	0.00295292	0.00295154	0.00294995	0.00294959	0.00295124	0.00295032	0.00295535	0.00295751	0.00295952	0.00295203	0.00295009	0.00295138	0.00294614	0.00294669	0.00294678	0.00294846	0.00294692	0.00295679	0.00295653	0.00295443	0.00295737	0.00295197	0.0029704	0.00297253	0.00297494	0.00294239	0.002943	0.00294382	0.00294728	0.00294786	0.00293814	0.00294229
GCT	0.0174527	0.0174421	0.0174342	0.0174301	0.0174387	0.0174376	0.0174304	0.0174187	0.0173923	0.0174418	0.017439	0.0174339	0.0174372	0.0174355	0.017435	0.0174279	0.0174216	0.0174371	0.0174327	0.0174241	0.0174401	0.0174292	0.0174232	0.017448	0.0174196	0.0174541	0.0174526	0.0174492	0.0174215	0.0174217	0.0174271	0.0174708	0.0174432	0.0174295	0.0174181	0.0174457	0.0174468	0.0174411	0.0174519	0.0174387	0.0174325	0.0174318	0.0174354
GGA	0.00941011	0.00939641	0.00939672	0.0094003	0.00939592	0.00939037	0.00937282	0.00938986	0.00938907	0.00940269	0.0093991	0.00940521	0.00940159	0.00939452	0.00939263	0.00938433	0.00939032	0.00936618	0.0093703	0.00937541	0.00936832	0.00936507	0.00936	0.00936315	0.00935687	0.00944021	0.00943324	0.00944006	0.0094404	0.00944257	0.00942878	0.00940613	0.00944022	0.00943792	0.00944574	0.00942112	0.00941482	0.00943167	0.00943251	0.00942217	0.00941988	0.00941704	0.00942871
GGC	0.00747772	0.00748407	0.00749235	0.00749963	0.00749686	0.00749049	0.00748672	0.00747681	0.00745628	0.00747063	0.00747812	0.00747946	0.00748267	0.00746894	0.00746855	0.00747824	0.0074644	0.00747677	0.00748607	0.00748634	0.00748167	0.00747562	0.00747719	0.00748071	0.00746715	0.00747304	0.00747339	0.00747107	0.00746837	0.00746454	0.00746854	0.00748111	0.0074697	0.00748916	0.00748924	0.0074893	0.00748643	0.00747269	0.00747738	0.00748045	0.00747859	0.00747453	0.00746619
GGG	0.00452747	0.00452885	0.00452871	0.00453244	0.00453011	0.00452234	0.00449457	0.00450675	0.00452184	0.00452724	0.00452693	0.00453018	0.0045307	0.00452192	0.004524	0.004527	0.00452873	0.00445798	0.00445907	0.00446187	0.00445728	0.00445044	0.00443961	0.00446059	0.00445191	0.00448797	0.00448799	0.00449233	0.00449731	0.00449892	0.00449344	0.00449444	0.00449006	0.00449689	0.00450071	0.00449877	0.00450898	0.00448769	0.00449275	0.00449813	0.00449826	0.00449811	0.00449116
GGT	0.0152043	0.0152167	0.0152193	0.0152193	0.0152204	0.0152156	0.0152285	0.0152303	0.0152231	0.0152275	0.0152186	0.0152215	0.0152219	0.0152153	0.0152238	0.015212	0.0152012	0.0152139	0.0152112	0.01521	0.0152091	0.0152088	0.015202	0.0152089	0.0152125	0.0151806	0.0151778	0.0151811	0.0151836	0.0151856	0.015195	0.0151909	0.0151534	0.0151481	0.0151455	0.0151637	0.0151328	0.0151783	0.0151865	0.0151852	0.0151872	0.0151886	0.0151902
GTA	0.0156909	0.0156892	0.0156776	0.0156701	0.0156838	0.0156923	0.0156709	0.0156591	0.0156784	0.0156972	0.0156912	0.0156862	0.0156899	0.0157049	0.0156972	0.0156931	0.0157015	0.0156946	0.0156732	0.0156636	0.0156866	0.0156939	0.0156947	0.0156908	0.0156978	0.0157007	0.0156956	0.0156914	0.0156766	0.0156724	0.0157068	0.0156913	0.0156483	0.0156393	0.0156235	0.0156589	0.0156587	0.015689	0.0156927	0.0156998	0.0156995	0.0156878	0.0156961
GTC	0.00901015	0.00901387	0.00901764	0.00901508	0.00901603	0.00902254	0.0090175	0.00901128	0.0090065	0.00898724	0.00901311	0.00900277	0.00899995	0.00900245	0.00900459	0.00899708	0.00900736	0.0090105	0.00901866	0.00901262	0.0090217	0.00901832	0.00902491	0.0090282	0.00901828	0.00901264	0.00901925	0.00901982	0.00901821	0.00901729	0.00902993	0.00903156	0.00900912	0.00901526	0.00900438	0.00902884	0.0089983	0.00904824	0.00904661	0.00905232	0.00904973	0.00904611	0.00904291
GTG	0.0185293	0.0185177	0.0185097	0.0185106	0.0185191	0.0185181	0.0184889	0.018509	0.0185287	0.0185193	0.0185207	0.018519	0.0185216	0.0185211	0.0185175	0.0185231	0.018504	0.0185176	0.0185108	0.0185065	0.0185259	0.0185256	0.0185373	0.0185339	0.018528	0.0184863	0.0184892	0.0184948	0.0184807	0.0184865	0.0185044	0.0184804	0.0184847	0.0184637	0.0184562	0.0184792	0.0184903	0.018486	0.0185044	0.0185065	0.0185072	0.0184922	0.0185127
GTT	0.0234316	0.0234572	0.023486	0.0234942	0.0234845	0.0234739	0.0235094	0.0235065	0.0234812	0.0234669	0.0234725	0.0234795	0.0234889	0.0234779	0.0234828	0.0235152	0.0235348	0.0234534	0.0234764	0.0234855	0.0234718	0.0234647	0.023463	0.0234807	0.0234796	0.023437	0.0234414	0.0234435	0.0234792	0.0234786	0.0234592	0.0234887	0.0234459	0.0234974	0.0235107	0.0235015	0.0234439	0.0234544	0.023441	0.0234612	0.0234632	0.0234557	0.0234223
TAA	0.0240383	0.0240453	0.0240312	0.0240375	0.0240502	0.0240536	0.0240435	0.0240573	0.0240629	0.0240609	0.0240388	0.0240427	0.0240486	0.0240636	0.0240655	0.0240766	0.0240638	0.0240768	0.024058	0.0240636	0.0240805	0.0240896	0.0241075	0.0241027	0.0241123	0.0240592	0.0240508	0.0240517	0.0240387	0.0240488	0.0240648	0.0240407	0.0240509	0.0240322	0.0240284	0.0240578	0.0241381	0.0240465	0.0240573	0.0240593	0.0240648	0.0240596	0.0240953
TAC	0.020403	0.0204009	0.0204221	0.0204266	0.0204253	0.0204124	0.0204569	0.0204285	0.0204101	0.0203944	0.0204073	0.0204065	0.020415	0.0203991	0.0204148	0.0203945	0.0203866	0.0203967	0.0204149	0.0204174	0.0204118	0.0203976	0.0204242	0.0204124	0.0204095	0.0203897	0.0203913	0.020392	0.0204123	0.0204104	0.0204165	0.0204079	0.0203659	0.0203834	0.0203869	0.0203889	0.0203135	0.020357	0.0203608	0.0203684	0.02036	0.02036	0.0203415
TAG	0.0142731	0.0142677	0.0142461	0.0142385	0.0142491	0.0142552	0.0142214	0.014227	0.0142636	0.0143305	0.0143019	0.0143054	0.0143017	0.014323	0.0143138	0.0143166	0.0143094	0.0142475	0.0142242	0.0142163	0.0142298	0.0142453	0.0142185	0.0142224	0.0142166	0.0142903	0.0142826	0.0142794	0.0142521	0.0142496	0.0142651	0.0142417	0.0142884	0.0142466	0.0142388	0.0142514	0.0142337	0.0142799	0.0142851	0.0142766	0.0142799	0.01428	0.0142835
TAT	0.0208393	0.0208266	0.0208438	0.0208471	0.0208546	0.0208544	0.020865	0.0208765	0.0208509	0.02086	0.0208408	0.02085	0.0208548	0.0208648	0.020862	0.0208951	0.0209455	0.0208256	0.0208356	0.0208432	0.0208527	0.0208428	0.0208254	0.020878	0.0208755	0.0208221	0.0208289	0.0208357	0.0208442	0.0208519	0.0208506	0.0208904	0.0208542	0.0208676	0.020878	0.0208779	0.0208661	0.0208255	0.0208136	0.0208306	0.0208345	0.0208206	0.020806
TCA	0.0184119	0.0184065	0.018423	0.0184243	0.0184094	0.0184036	0.0184153	0.0184176	0.0184106	0.018397	0.0184131	0.0184056	0.0183979	0.0183869	0.0183876	0.0183985	0.0184093	0.0183969	0.0184238	0.0184308	0.0184165	0.0184074	0.0184118	0.0184241	0.0184115	0.0183922	0.0184063	0.0184024	0.0184274	0.0184263	0.0183989	0.0184558	0.0183989	0.018443	0.0184565	0.0184201	0.0183794	0.0184709	0.018451	0.0184673	0.0184692	0.0184637	0.0184505
TCC	0.00698553	0.00698385	0.00697556	0.00697268	0.0069714	0.00697556	0.00697018	0.00697569	0.00697583	0.00699006	0.00698175	0.00698251	0.00697815	0.00698468	0.00697934	0.00697317	0.00695615	0.00699047	0.00697802	0.0069784	0.00697819	0.00698775	0.00697978	0.00698117	0.00698181	0.0069928	0.00698368	0.00698382	0.00698007	0.00698257	0.00697617	0.00696269	0.00698934	0.00697883	0.00697733	0.00696276	0.00696471	0.00698471	0.00698752	0.0069837	0.00698846	0.0069878	0.0069987
TCG	0.0037304	0.00374989	0.0037366	0.00373355	0.00373503	0.00374789	0.00372066	0.0037182	0.00372841	0.00373565	0.00374217	0.0037426	0.00374578	0.00374996	0.00374553	0.00372907	0.00371876	0.00374965	0.00374307	0.00373725	0.0037381	0.00374702	0.00374683	0.00373306	0.00374178	0.00378278	0.00377998	0.00378071	0.0037756	0.00376942	0.00377324	0.0037832	0.00378113	0.00377802	0.00376815	0.00376986	0.00374883	0.00377967	0.0037807	0.00377499	0.00377759	0.0037793	0.00378353
TCT	0.018079	0.0180995	0.0180788	0.0180669	0.0180767	0.0180891	0.0180743	0.0180752	0.0181106	0.0180743	0.0181136	0.0181107	0.0181119	0.0181216	0.0181212	0.018095	0.018132	0.0181026	0.0180845	0.0180687	0.0180809	0.0181008	0.0181174	0.0180728	0.0180893	0.0181385	0.0181505	0.0181373	0.0181112	0.0180994	0.0181244	0.0181011	0.0181382	0.0181101	0.018095	0.0181097	0.0181635	0.0181413	0.018133	0.0180978	0.0181002	0.0181247	0.0181129
TGA	0.0210965	0.0210829	0.0210979	0.0210916	0.0210918	0.0210872	0.0211058	0.0211087	0.0211094	0.0211028	0.0210975	0.0210917	0.0210835	0.0210891	0.0210887	0.0210876	0.0210878	0.0210855	0.0210906	0.0210868	0.0210926	0.0210935	0.0210898	0.0210728	0.0210882	0.0210949	0.0210914	0.0210944	0.0210838	0.0210896	0.0210897	0.0211147	0.0210921	0.0210855	0.021087	0.0210985	0.0210722	0.0210972	0.0210944	0.0211005	0.0211013	0.0210968	0.0210947
TGC	0.0183392	0.0183282	0.0183354	0.0183377	0.0183363	0.0183319	0.0183281	0.0183343	0.0183267	0.0183249	0.0183298	0.0183262	0.0183277	0.0183261	0.0183278	0.0183458	0.0183721	0.0183273	0.0183409	0.0183384	0.0183386	0.0183277	0.0183443	0.0183462	0.0183388	0.0183268	0.0183306	0.0183347	0.0183397	0.018344	0.0183463	0.0183548	0.0183227	0.0183287	0.018328	0.0183303	0.0183248	0.0183249	0.0183209	0.0183254	0.0183227	0.0183205	0.0183177
TGG	0.0185909	0.0185743	0.0186038	0.0186073	0.0186111	0.0186008	0.018642	0.0186244	0.0185858	0.0185707	0.0185827	0.0185824	0.0185871	0.0185727	0.0185786	0.0185842	0.0185895	0.0185622	0.0185841	0.0185821	0.018587	0.0185711	0.0185806	0.0186012	0.018576	0.0185613	0.0185696	0.0185647	0.0185698	0.0185689	0.0185755	0.0185882	0.0185622	0.0185856	0.0185804	0.0185996	0.0185702	0.0185749	0.0185712	0.018585	0.0185761	0.018573	0.0185571
TGT	0.0287756	0.0287768	0.0287767	0.0287689	0.0287827	0.0287925	0.0287757	0.0287852	0.0288132	0.0287648	0.0287832	0.0287769	0.0287902	0.0287917	0.0287801	0.0288049	0.0288002	0.0287764	0.0287712	0.0287617	0.0287858	0.0287906	0.028804	0.0287921	0.0287766	0.0287338	0.0287454	0.0287449	0.0287382	0.0287326	0.0287516	0.0287573	0.0286837	0.0287026	0.0286859	0.0287342	0.0287719	0.0287484	0.0287563	0.0287715	0.0287712	0.0287697	0.0287585
TTA	0.0293265	0.0293403	0.0293506	0.0293578	0.0293667	0.0293668	0.0293875	0.0293946	0.0293829	0.0294052	0.029364	0.0293768	0.0293835	0.0294001	0.0294099	0.0294231	0.0294233	0.0293621	0.0293533	0.0293608	0.0293684	0.0293735	0.0293719	0.0293845	0.0293887	0.0293002	0.0292935	0.0293023	0.0292956	0.029306	0.0293089	0.029325	0.0293747	0.0293476	0.0293568	0.0293615	0.0293749	0.029261	0.0292675	0.029284	0.0292821	0.029267	0.0292734
TTC	0.0172513	0.0172634	0.0172512	0.0172456	0.0172376	0.0172461	0.0172457	0.0172391	0.0172764	0.0172642	0.017255	0.017259	0.017252	0.0172594	0.0172557	0.0172278	0.0172145	0.0172724	0.0172584	0.0172575	0.0172428	0.0172562	0.017242	0.0172325	0.0172421	0.0173376	0.0173333	0.0173254	0.0173245	0.017316	0.0173035	0.0173181	0.0173341	0.0173265	0.0173285	0.0172973	0.017301	0.0173664	0.0173532	0.0173418	0.0173476	0.0173654	0.0173782
TTG	0.0274277	0.0274362	0.0274698	0.0274724	0.0274675	0.0274557	0.0275014	0.0274853	0.0274622	0.02742	0.0274399	0.0274338	0.0274352	0.0274281	0.0274378	0.0274637	0.0274967	0.0274196	0.0274507	0.0274503	0.0274406	0.027436	0.0274403	0.0274505	0.0274352	0.0273714	0.0273852	0.0273847	0.02741	0.0274042	0.0274034	0.0274312	0.0273447	0.0273865	0.0273888	0.0273911	0.0273848	0.0273985	0.0273877	0.0274198	0.0274118	0.0274136	0.0273873
TTT	0.0337114	0.0337081	0.0337188	0.0337155	0.0337264	0.0337525	0.0337808	0.0337689	0.0337891	0.033745	0.0337123	0.033713	0.0337178	0.0337595	0.0337754	0.0337861	0.0337914	0.0337089	0.0337047	0.0336947	0.0337255	0.0337611	0.0337642	0.0337497	0.0337891	0.0336095	0.0336075	0.0336066	0.0336124	0.0336176	0.0336478	0.0337052	0.0337512	0.0337053	0.0336953	0.0337394	0.0337787	0.0335924	0.0336003	0.0336168	0.0336157	0.0336236	0.0336591

## Sheet: Table S5 
Table S5: Correlation coefficients for time-dependent changes in the oligonucleotide composition of SARS-CoV-2.
		Clade_G		Clade_GH		Clade_GR		Clade_L		Clade_S		Clade_V
		r	p	r	p	r	p	r	p	r	p	r	p
	A	-0.00930762	0.98104	-0.361563	0.378836	0.0927968	0.827002	-0.461779	0.296897	0.608363	0.200034	0.463171	0.432094
	C	-0.945369	0.000118924	-0.834073	0.0100466	-0.948037	0.000337233	-0.978716	0.000125487	-0.349641	0.49691	-0.97497	0.0047358
	G	-0.520922	0.150432	-0.257916	0.537425	-0.375391	0.359471	0.675528	0.0958098	-0.455717	0.363745	-0.00243389	0.996901
	U	0.969853	1.52089e-05	0.921302	0.00114774	0.913926	0.00149309	0.724976	0.0652682	0.730893	0.0988839	0.661231	0.224277
	AA	0.021813	0.95558	-0.788347	0.0201002	-0.2596	0.534676	-0.440229	0.322907	0.519146	0.291239	0.595695	0.289151
	AC	-0.583293	0.0992146	-0.805896	0.0157245	-0.867691	0.00523098	0.245355	0.595896	0.155345	0.768857	-0.380494	0.527498
	AG	-0.765069	0.0163018	-0.711897	0.0476101	-0.272311	0.514096	-0.571491	0.180144	-0.443386	0.378504	-0.672853	0.213253
	AU	0.861246	0.00285306	0.757132	0.0296071	0.883937	0.00357631	0.455855	0.303951	-0.124512	0.814198	0.470067	0.424329
	CA	-0.727212	0.0264098	-0.926137	0.000952444	-0.854058	0.00694537	-0.157054	0.736653	-0.817817	0.0467626	-0.451135	0.445724
	CC	-0.930212	0.000276006	-0.870743	0.00488896	-0.75163	0.0315229	-0.902755	0.00537171	-0.0919328	0.862489	-0.898577	0.0381785
	CG	-0.462103	0.210451	-0.386752	0.343907	-0.814201	0.0138836	0.785567	0.0362976	-0.77373	0.0710049	-0.410556	0.492344
	CU	-0.811786	0.00788057	-0.395117	0.33265	-0.790981	0.0194004	-0.517058	0.234684	-0.0992895	0.851555	-0.151982	0.807238
	GA	-0.283785	0.459284	-0.898972	0.0023865	-0.796116	0.0180803	-0.61981	0.13764	-0.294186	0.571452	-0.727381	0.163704
	GC	-0.728973	0.0258669	-0.49397	0.213442	-0.475407	0.233815	0.631621	0.128123	-0.638809	0.172128	0.443073	0.454906
	GG	-0.601663	0.0865168	-0.793049	0.0188618	-0.646232	0.0833965	-0.0328763	0.944218	-0.231991	0.658256	-0.103599	0.86833
	GU	0.511955	0.158843	0.912189	0.0015832	0.911903	0.00159837	0.908705	0.00460246	-0.0661923	0.900857	0.272831	0.65698
	UA	0.888258	0.00137452	0.796207	0.0180573	0.918604	0.00126722	0.619664	0.13776	0.497184	0.315674	0.29794	0.626341
	UC	-0.326911	0.390518	-0.22911	0.585215	-0.0992834	0.815063	-0.578161	0.17394	-0.411527	0.417556	-0.928288	0.022803
	UG	0.798397	0.0098842	0.745377	0.0337901	0.521412	0.185096	0.830865	0.020583	-0.138437	0.793671	0.811955	0.095078
	UU	0.950238	8.61915e-05	0.825541	0.0115983	0.918704	0.00126264	0.777916	0.0394475	0.921064	0.0091005	0.501068	0.389825
	AAA	0.196244	0.612825	0.462174	0.24892	0.541585	0.165624	-0.189947	0.683322	-0.529786	0.27967	0.313217	0.60782
	AAC	-0.470796	0.200862	-0.746964	0.0332053	-0.460261	0.251142	-0.934599	0.00202777	0.366945	0.474287	0.320409	0.599134
	AAG	-0.1831	0.637256	-0.6995	0.0534681	-0.0885023	0.834923	0.485411	0.26949	-0.0251593	0.962269	0.765569	0.131359
	AAU	0.679219	0.0442041	0.126947	0.764519	-0.146183	0.729788	-0.613919	0.142517	0.572579	0.234991	-0.315589	0.604953
	ACA	0.155941	0.688687	0.532407	0.174338	0.509636	0.196999	0.908736	0.00459872	-0.677741	0.139043	0.794939	0.107976
	ACC	-0.841331	0.00446982	-0.847283	0.00791563	-0.754059	0.030668	-0.911671	0.00424471	0.246884	0.637198	-0.871497	0.0542189
	ACG	0.151941	0.696361	0.00617718	0.988418	-0.14184	0.737595	0.915169	0.00384421	-0.84423	0.0345065	0.824249	0.086077
	ACU	0.720182	0.0286516	-0.429745	0.287939	-0.336472	0.415114	0.727817	0.0637024	0.675967	0.140485	0.451852	0.44491
	AGA	-0.162767	0.675648	0.0994495	0.814758	-0.333315	0.419781	-0.290226	0.527783	0.204475	0.697562	0.212785	0.731132
	AGC	-0.570102	0.108995	-0.872177	0.00473341	-0.406379	0.317772	-0.800452	0.0305839	-0.121561	0.818557	-0.775798	0.123061
	AGG	-0.779728	0.013214	-0.891126	0.00296864	-0.847945	0.00781725	-0.825544	0.022173	0.135744	0.797635	-0.731703	0.15994
	AGU	-0.141927	0.715677	0.829894	0.010789	0.918553	0.00126954	0.700708	0.0794795	-0.513295	0.297677	-0.434467	0.464752
	AUA	0.714471	0.0305619	0.397006	0.330133	0.88735	0.00327871	-0.119773	0.798122	0.184995	0.725673	0.530131	0.358121
	AUC	-0.229098	0.553219	0.511493	0.195096	0.0811548	0.848501	-0.673219	0.097388	-0.252996	0.628603	-0.747341	0.146538
	AUG	0.567118	0.111284	-0.192828	0.64731	0.0705313	0.868192	-0.499662	0.253543	-0.467978	0.349277	0.704345	0.184181
	AUU	0.80789	0.00843208	0.783604	0.0213995	0.917924	0.00129855	0.899707	0.00579286	0.0531283	0.920382	0.273011	0.656759
	CAA	-0.439184	0.236922	-0.954759	0.000223706	-0.809715	0.0148601	-0.332665	0.465973	-0.135945	0.797339	0.183425	0.767773
	CAC	-0.692423	0.0387116	-0.158783	0.707248	-0.390612	0.338691	0.550014	0.200839	-0.229269	0.662122	-0.192114	0.756905
	CAG	-0.826089	0.00606554	-0.648011	0.0822699	0.191486	0.649644	-0.855682	0.0140387	-0.854756	0.0301118	-0.928206	0.0228418
	CAU	0.563066	0.114439	0.587425	0.125726	0.539665	0.167427	0.50758	0.244876	0.168914	0.749039	0.549641	0.337212
	CCA	-0.749148	0.0201627	-0.802324	0.016561	-0.396018	0.331448	-0.93193	0.00223783	0.169133	0.74872	-0.0388444	0.950554
	CCC	-0.687424	0.0407358	-0.807581	0.0153394	-0.667434	0.0705444	-0.9363	0.00190029	-0.497046	0.31583	-0.812083	0.0949831
	CCG	-0.368804	0.328711	0.150352	0.72231	-0.296577	0.475665	-0.14281	0.760023	-0.601179	0.20687	-0.414535	0.487729
	CCU	-0.78132	0.0129044	-0.708118	0.0493526	-0.81409	0.0139074	-0.460113	0.298874	0.854231	0.0303244	-0.682551	0.204173
	CGA	-0.19301	0.618806	-0.258947	0.535742	-0.480578	0.228044	-0.852256	0.0148578	0.205371	0.696274	-0.723183	0.167384
	CGC	-0.284371	0.458317	-0.71594	0.0457877	-0.694851	0.0557702	0.69515	0.0829454	-0.616167	0.192717	0.454523	0.441877
	CGG	-0.292516	0.444963	-0.290719	0.484836	-0.560589	0.148348	0.870451	0.0108071	0.858496	0.0286185	-0.540505	0.346964
	CGU	-0.493571	0.176919	0.404922	0.319678	0.62474	0.0977193	0.859669	0.0131184	-0.774558	0.0705075	-0.828572	0.0829775
	CUA	-0.528947	0.143128	0.669751	0.069216	0.042772	0.9199	0.389279	0.388053	-0.419478	0.407689	-0.44034	0.458027
	CUC	-0.419085	0.261537	0.446117	0.267887	0.434013	0.282643	-0.285872	0.534273	-0.881401	0.0202646	0.572047	0.313593
	CUG	0.0455774	0.907311	0.57399	0.136791	0.0663393	0.875978	0.87879	0.00919386	-0.565921	0.241741	0.173125	0.780677
	CUU	0.0129191	0.973685	-0.716375	0.0455942	-0.793563	0.0187291	-0.944809	0.001334	0.637198	0.173561	-0.0423508	0.946093
	GAA	-0.45955	0.213315	-0.735942	0.0373954	-0.627282	0.0959567	-0.350672	0.440599	0.520948	0.289267	-0.0806098	0.897476
	GAC	-0.727703	0.0262578	-0.905146	0.00198465	-0.64609	0.0834871	-0.353038	0.437305	-0.549401	0.258814	-0.178727	0.773655
	GAG	-0.107042	0.784007	-0.583637	0.128793	-0.64235	0.0858869	-0.495198	0.25849	-0.0221342	0.966804	-0.814961	0.0928522
	GAU	0.530189	0.142017	0.373539	0.362037	0.433429	0.283365	-0.0822778	0.860793	-0.895986	0.0156656	-0.0357383	0.954506
	GCA	-0.0645074	0.869042	0.0708901	0.867526	-0.318927	0.441324	0.847148	0.016129	0.209456	0.690411	0.244081	0.692341
	GCC	0.264799	0.491091	0.0439976	0.917611	-0.166477	0.693576	0.0976618	0.834994	-0.261325	0.616935	0.609789	0.274832
	GCG	-0.603074	0.0855853	-0.751963	0.0314048	-0.867173	0.00529056	0.845125	0.0166491	-0.300482	0.562842	-0.160402	0.796649
	GCU	-0.829853	0.00564039	-0.885188	0.00346529	-0.178664	0.672066	-0.114489	0.806909	-0.682187	0.135457	0.297118	0.62734
	GGA	-0.729492	0.0257082	-0.844334	0.00836346	-0.749193	0.0323948	-0.653257	0.111594	-0.521818	0.288317	-0.805029	0.100268
	GGC	-0.443764	0.231495	-0.39969	0.326571	-0.595276	0.1195	0.117327	0.802187	-0.44708	0.374062	0.62431	0.260284
	GGG	-0.603507	0.0853013	-0.163001	0.699743	-0.431977	0.285163	0.675583	0.095772	0.399723	0.432349	0.91868	0.0274952
	GGU	0.783187	0.0125475	-0.765565	0.0268132	-0.37333	0.362327	0.88194	0.00862337	0.871898	0.023564	-0.357892	0.554242
	GUA	-0.539891	0.133511	0.409489	0.31372	0.505555	0.201216	-0.154878	0.740214	0.208577	0.691671	0.429904	0.469992
	GUC	-0.145851	0.708093	0.263006	0.529133	0.674417	0.0665859	0.843575	0.0170539	-0.507661	0.303926	-0.109291	0.861124
	GUG	-0.235262	0.542287	-0.483575	0.224732	0.758308	0.0292074	0.0390225	0.933804	0.509789	0.30156	0.291796	0.633815
	GUU	0.700308	0.0356533	0.861591	0.00595969	0.352496	0.391777	0.824835	0.0223899	-0.395952	0.437111	0.000111462	0.999858
	UAA	0.778899	0.0133772	0.661915	0.0737689	0.886439	0.00335651	-0.253197	0.583804	0.82725	0.0421864	0.70906	0.179934
	UAC	0.447394	0.227243	-0.311192	0.45309	0.258756	0.536054	0.833059	0.0199467	-0.528439	0.281124	-0.496663	0.394686
	UAG	-0.493564	0.176926	-0.078854	0.852761	-0.475803	0.23337	-0.86902	0.0110993	0.105842	0.841829	-0.765749	0.131212
	UAU	0.77616	0.0139259	0.791051	0.019382	0.715206	0.0461152	0.912711	0.00412327	-0.362596	0.479943	0.544036	0.343187
	UCA	-0.0517385	0.894834	-0.159115	0.706657	0.102354	0.809422	0.694562	0.0833164	-0.362123	0.480559	-0.310667	0.610904
	UCC	-0.621704	0.0738647	-0.810716	0.0146386	-0.193912	0.645426	-0.889976	0.00726236	0.755215	0.0825458	-0.942379	0.0164594
	UCG	-0.512538	0.158288	-0.480837	0.227756	-0.346355	0.400652	-0.347783	0.444633	0.328268	0.525285	-0.911853	0.0309969
	UCU	0.219511	0.570385	0.57128	0.139086	0.024919	0.953296	-0.7838	0.0370121	-0.496981	0.315903	0.289963	0.636048
	UGA	0.674126	0.0464494	-0.742107	0.0350143	-0.269946	0.517903	0.402891	0.370163	-0.0848439	0.873039	-0.436104	0.462875
	UGC	-0.521993	0.149444	0.734902	0.0378064	0.478267	0.230613	0.992443	9.49758e-06	-0.734613	0.0962999	0.29567	0.6291
	UGG	0.446988	0.227716	0.500621	0.206377	0.408591	0.314888	0.853485	0.0145609	-0.545239	0.263187	0.329318	0.588406
	UGU	0.681946	0.0430314	0.823485	0.0119934	0.51639	0.190124	0.594866	0.158872	0.502659	0.309514	0.880362	0.0487738
	UUA	0.956525	5.40596e-05	0.724479	0.0420789	0.927497	0.000901755	0.798604	0.0312637	0.344404	0.50382	0.191932	0.757134
	UUC	0.0635791	0.870913	-0.806666	0.0155479	-0.852975	0.00709497	-0.862203	0.0125521	0.397781	0.434798	-0.886788	0.0449422
	UUG	0.665823	0.0502637	0.783774	0.021352	0.202616	0.630364	0.915657	0.00379019	0.0516457	0.9226	0.690389	0.196917
	UUU	0.937254	0.00019156	0.816389	0.0134224	0.891456	0.00294247	0.804791	0.0290208	0.925798	0.0080547	0.413262	0.489205

## Sheet: Table S6 
Tabls S6: Fold change in frequency between strains at the beginning of the epidemic and those at the last month of analysis.
		Clade G		Clade GH		Clade GR		Clade L		Clade V		Clade S
	#	log10 FC	p-value	log10 FC	p-value	log10 FC	p-value	log10 FC	p-value	log10 FC	p-value	log10 FC	p-value
	A	-0.000114407	0.2397	-5.16975e-05	0.2702	5.47154e-05	0.1042	-0.000159201	0.05645	0.000121906	0.0245	2.61694e-05	0.1282
	C	-0.000397468	0.008251	-0.000545072	3.193e-10	-0.000445773	1.025e-14	-0.0003849	2.071e-06	-0.000334405	2.2e-16	-9.71223e-05	0.0009748
	G	-7.23371e-05	0.322	5.32063e-05	0.4738	-2.64913e-05	0.5302	4.88489e-05	0.7786	-2.13981e-05	0.6858	-6.7212e-05	0.01737
	U	0.000377586	2.2e-16	0.000326625	3.027e-11	0.000220149	6.001e-06	0.000338197	0.0005231	9.09761e-05	0.006837	7.23147e-05	0.01055
	AA	-0.000235638	0.286	-0.000122737	0.1004	4.06626e-05	0.6367	-0.000422678	0.1062	0.000561561	0.005703	0.000140326	0.004396
	AC	-0.000225018	0.0001399	-0.000441755	2.233e-07	-0.00021159	0.002398	3.19785e-06	0.5806	-3.83091e-05	0.6159	4.67938e-05	0.2958
	AG	-0.000432717	5.151e-05	-9.87022e-05	0.2932	-2.27389e-05	0.7204	-0.000491228	0.003041	-0.000332269	0.000195	-1.40155e-05	0.8273
	AU	0.000384182	0.0005028	0.000446441	0.0006082	0.000376445	2.511e-09	0.000311829	0.005312	5.36748e-05	0.4237	-0.00013735	0.005564
	CA	-0.000361528	3.644e-06	-0.000319772	0.0005903	-8.23805e-05	0.2804	6.09562e-05	0.4441	-2.75082e-06	0.9581	-0.00019	2.235e-05
	CC	-0.00154635	0.0001928	-0.00234294	2.791e-16	-0.00170984	2.424e-08	-0.00254345	7.253e-10	-0.00160513	1.12e-11	9.26594e-05	0.5146
	CG	0.000316435	0.7313	-0.000121052	0.8481	-0.000300356	0.1868	0.000572486	0.105	-0.000788576	0.009996	-0.000327432	0.03584
	CU	-0.00010193	0.4382	-0.000107807	0.1218	-0.000326441	0.0001057	-0.000108426	0.9333	4.33998e-05	0.5442	-5.83181e-05	0.2689
	GA	-1.51151e-05	0.8892	-0.000205512	0.01609	-0.000124773	0.09289	-0.00050921	0.01775	-0.000299687	0.0003561	1.42487e-05	0.7898
	GC	-0.000456459	0.03695	-7.7405e-05	0.6254	-0.000247708	0.03875	0.000373607	0.1985	0.000327085	0.00274	-0.000202442	0.000985
	GG	-0.000238991	0.03577	-0.000356214	0.005572	-0.000252823	0.01946	-3.16054e-05	0.5836	-5.24734e-05	0.5259	2.57923e-05	0.6028
	GU	0.000191275	0.127	0.000526242	9.101e-09	0.000320928	4.176e-07	0.000358194	1.386e-05	2.07881e-05	0.7865	-2.61583e-05	0.575
	UA	0.000182047	0.02962	0.000299989	0.006689	0.000349407	1.368e-07	0.000128239	0.3878	-2.55514e-05	0.6628	0.000104535	0.04323
	UC	0.000169893	0.5679	0.000164016	0.3289	-0.000146381	0.1302	-0.000165184	0.9504	-0.000431635	1.104e-06	-0.000283643	3.853e-06
	UG	0.000164054	0.06103	0.00041485	1.901e-06	0.000108224	0.1399	0.000367835	1.619e-06	0.000365656	1.002e-07	-9.13039e-05	0.02894
	UU	0.000784789	7.127e-07	0.000352106	0.001034	0.000372763	0.0008847	0.000654787	0.002071	0.000140981	0.07553	0.000327396	4.448e-09
	AAA	-0.000594426	0.2855	0.000245833	0.03386	0.000241298	0.0761	-0.000606219	0.4377	6.00211e-05	0.8868	-0.000141905	0.2632
	AAC	-0.000516468	0.08545	-0.000649608	0.01101	-0.000683508	0.005836	-0.000664293	0.07778	0.00102823	0.03948	0.000807073	2.322e-12
	AAG	-0.000339996	0.2212	-0.000175526	0.2531	0.000290054	0.09078	0.000207706	0.7209	0.00184221	2.169e-11	-0.000106077	0.1787
	AAU	0.000515629	1.988e-05	-9.30165e-05	0.5791	0.000243609	0.05612	-0.000455835	0.02991	-0.000174826	0.1354	7.6883e-05	0.1946
	ACA	-0.000240628	0.2208	0.000492629	0.009084	0.000434633	0.01087	0.000591521	8.337e-07	0.000252846	0.0107	-0.000391331	5.091e-05
	ACC	-0.0037896	6.702e-10	-0.00211756	2.274e-09	-0.00171983	7.545e-07	-0.00263893	3.56e-07	-0.00226158	4.431e-11	0.000606787	1.386e-06
	ACG	0.00176455	0.03105	0.000501437	0.4701	1.35785e-05	0.9581	0.0012376	0.00504	0.00192152	1.342e-10	-0.000339999	0.131
	ACU	0.00128086	1.264e-09	-0.000447639	0.0026	-4.84596e-05	0.7222	0.000746763	0.002102	0.000732438	7.059e-08	0.000176863	0.04472
	AGA	-0.000280218	0.2068	0.000213731	0.1468	3.4337e-05	0.7615	-0.000855981	0.01987	0.000424762	0.0006459	5.35692e-05	0.518
	AGC	-0.000537955	0.02209	-0.00113266	4.408e-06	-0.000419308	0.08565	-0.000175316	0.1032	-0.000268677	0.1162	0.000165446	0.2855
	AGG	-0.0006726	0.0774	-0.00180314	5.505e-06	-0.00112017	3.128e-05	-0.00172473	8.16e-05	-0.000765909	0.01829	0.00059211	0.001645
	AGU	-0.000207844	0.3269	0.00132573	3.187e-08	0.000795822	2.621e-05	0.00035546	0.6147	-0.00106159	0.003788	-0.00040591	3.925e-06
	AUA	0.00028309	0.1515	-0.000146362	0.5418	0.000571298	0.0002291	-7.65347e-05	0.6117	0.000275821	0.05104	-0.000127372	0.445
	AUC	0.000434386	0.3946	0.00130659	5.551e-06	-0.000113864	0.6092	-0.000470622	0.5846	-0.0016761	0.0001048	-0.000240714	0.05022
	AUG	4.17681e-05	0.8554	-0.000186441	0.2069	-7.28836e-05	0.577	-9.32597e-05	0.1969	0.000552155	2.601e-06	-0.000203728	0.004279
	AUU	0.000680072	0.003025	0.00106446	0.0001034	0.00092582	3.02e-13	0.0013094	0.0006524	-5.59259e-05	0.6923	-4.97852e-05	0.5227
	CAA	-0.000448649	0.1165	-0.000877637	7.569e-06	-0.000518829	0.0008682	-4.0779e-05	0.6771	0.00046982	0.05225	-0.000191558	0.07281
	CAC	-0.000463638	0.07623	-0.000437085	0.0125	5.9421e-05	0.7763	0.000631341	0.07004	-0.000147612	0.3594	-0.000258674	0.01186
	CAG	-0.00130162	6.654e-05	-0.000139625	0.5137	0.000170701	0.3607	-0.00094172	0.0434	-0.00109523	7.026e-07	-0.000342576	0.001942
	CAU	0.000696429	0.005324	0.000489337	0.01871	0.000109275	0.642	0.000535041	0.03397	0.00044753	0.001574	-2.97846e-05	0.7539
	CCA	-0.00187494	0.005873	-0.00364573	1.361e-15	-0.00199442	1.8e-05	-0.00328527	1.371e-11	-0.000192724	0.7261	0.000715951	2.639e-06
	CCC	-0.00126579	0.4066	-0.00801218	3.661e-13	-0.00699932	3.553e-11	-0.00745249	1.191e-07	-0.00530615	1.832e-08	-0.00178495	0.01656
	CCG	0.00157653	0.3924	0.00163539	0.1029	0.000655307	0.1269	-0.00131918	0.3749	-0.00154241	0.01154	-0.0015285	9.884e-05
	CCU	-0.00198549	1.194e-08	-0.000958431	9.142e-05	-0.000680499	0.01884	-0.000933282	0.0004471	-0.00199474	9.634e-08	0.000544229	1.268e-05
	CGA	0.00262002	0.143	-0.000780298	0.5378	-0.00214622	0.001732	-0.00351724	0.002573	-0.000992081	0.03816	0.000780373	0.0406
	CGC	0.000612154	0.3002	-0.00260393	1.729e-07	-0.00173055	1.45e-05	0.00105724	0.02467	0.00239306	1.586e-05	-0.00111839	0.0002136
	CGG	0.00116656	0.3627	-0.000301856	0.702	-0.000106067	0.7937	0.00316096	0.007745	-0.00192526	0.001092	0.000732498	0.009756
	CGU	-0.00149105	0.0673	0.00179976	0.01814	0.00143968	2.903e-06	0.00147698	0.001336	-0.00195911	6.525e-07	-0.000937624	1.895e-05
	CUA	-0.000476428	0.01858	0.00101689	1.369e-05	0.000274171	0.1863	2.21746e-05	0.5988	-0.000922369	0.002547	-0.000131788	0.1826
	CUC	-0.000489175	0.2195	0.000688283	0.0824	0.000379856	0.1454	-0.000147829	0.5574	0.0017032	1.603e-06	-0.00134046	1.612e-12
	CUG	-5.57791e-05	0.8665	0.00101525	1.264e-07	3.44271e-05	0.8401	0.00100617	0.0002942	4.72749e-05	0.7645	-0.000602599	1.461e-08
	CUU	0.000322152	0.3321	-0.00204939	4.691e-16	-0.00127682	9.752e-10	-0.000951096	0.007992	0.000212	0.3984	0.00084953	4.838e-16
	GAA	-0.000231047	0.2947	-0.000254426	0.03601	-0.000237395	0.107	-0.00108915	0.0773	0.000114229	0.4619	1.40543e-05	0.8405
	GAC	-0.000391466	0.05378	-0.000500489	0.01892	-0.0004442	0.01089	-0.000218014	0.5758	3.87056e-05	0.8097	-0.000238258	0.02222
	GAG	0.000514329	0.08024	-0.00032311	0.4108	-0.000224908	0.4964	-0.000770788	0.08204	-0.00156421	0.000113	0.000544929	0.01516
	GAU	0.000190145	0.3758	0.000153316	0.4558	0.000341309	0.1124	0.000214333	0.2181	-0.000195378	0.3212	-0.000151343	0.06729
	GCA	0.00034361	0.3882	0.000305419	0.1824	-2.20478e-05	0.9076	0.000312384	0.1203	0.000414706	0.04191	-0.000156715	0.1285
	GCC	0.00190223	1.112e-09	0.000514604	0.1801	0.000403198	0.3131	-0.00017891	0.2599	0.00191347	4.261e-10	-0.000322845	0.2442
	GCG	-0.00269201	9.119e-07	-0.000301204	0.4789	-0.00127438	0.01056	0.00131042	0.2545	-0.00141274	0.02439	-0.000105866	0.734
	GCU	-0.00150536	3.78e-12	-0.000502321	0.009119	-0.000434326	0.06817	0.000452487	0.4283	9.11209e-05	0.5279	-0.000142077	0.2488
	GGA	-0.000972002	0.002356	-0.000571589	0.03059	-0.000432111	0.06431	-0.00124993	0.03653	-0.00116983	3.769e-06	-0.000136401	0.4404
	GGC	-0.00124709	0.00736	-0.000362666	0.2504	-0.000559645	0.04217	0.000448429	0.5283	0.0009719	7.869e-05	-0.000377744	0.002304
	GGG	-0.000540326	0.05473	0.000142855	0.6924	-0.000592095	0.04033	0.000623821	0.2145	0.00182524	1.105e-08	0.000335705	0.05573
	GGU	0.000536028	0.007221	-0.000749109	0.0005508	-4.0197e-05	0.8547	0.00037473	0.1978	-0.000590684	0.001511	0.000338938	0.01017
	GUA	-0.000347376	0.03843	0.000117438	0.4098	8.85875e-05	0.5943	-0.000117579	0.304	0.000287932	0.004509	0.000196042	0.06972
	GUC	-0.000175638	0.7312	0.000971138	0.01294	0.000374562	0.1922	0.000592491	0.005429	-0.000522177	0.001068	-0.00025589	0.06379
	GUG	-1.40593e-05	0.8896	-0.000359033	0.01425	0.000243336	0.09109	-0.000207208	0.5421	0.000129914	0.2875	0.000625271	6.771e-13
	GUU	0.000918837	0.0001667	0.00125558	2.309e-12	0.000484577	0.005526	0.000876644	0.001195	-3.82288e-05	0.8117	-0.000594394	9.966e-09
	UAA	0.000444927	0.02881	5.26057e-05	0.7334	0.000639896	5.363e-05	-0.000182499	0.1216	0.00157177	4.804e-07	0.000881376	2.662e-15
	UAC	0.000151691	0.4561	-0.000166691	0.4824	0.000272315	0.0832	0.000353027	0.0771	-0.0011207	0.001066	-0.000329183	0.0008235
	UAG	-0.000291101	0.4644	-0.000639686	0.02882	-0.000943947	0.0002239	-0.00124348	0.0001227	-0.00166548	3.562e-09	0.000108909	0.4535
	UAU	0.000241375	0.335	0.00177628	6.099e-15	0.00103976	6.391e-07	0.00128104	0.0002349	0.000246073	0.1255	-0.000405821	0.000494
	UCA	-3.06638e-05	0.8708	0.000290657	0.09743	0.000345162	0.0517	0.00116759	0.0001064	-0.000458551	0.03155	-0.000479447	1.519e-06
	UCC	-0.000603737	0.06389	-0.0021115	5.964e-06	-0.000538371	0.1133	-0.00130713	1.414e-05	-0.00153357	7.518e-08	0.000868711	3.067e-08
	UCG	-0.000231417	0.869	-0.0019673	0.08349	-0.000912505	0.04022	0.000370025	0.9592	-0.00372584	1.493e-06	0.000443293	0.2763
	UCU	0.000758126	0.1228	0.00138456	2.367e-06	-0.000321025	0.08949	-0.00118326	0.06745	0.000605515	0.01444	-0.000680281	1.085e-08
	UGA	0.000263979	0.2053	-0.000309194	0.08232	5.48309e-05	0.6817	0.000480086	0.126	-0.000409456	0.007064	-5.19141e-05	0.4347
	UGC	-0.000296094	0.2589	0.00111551	1.907e-07	0.000273185	0.1172	0.000572263	9.629e-05	4.94628e-05	0.734	-0.000170951	0.03034
	UGG	-0.000120785	0.6811	0.0004397	0.0166	0.000322682	0.07056	0.000434221	0.02789	0.000186441	0.1344	-0.000417963	1.059e-06
	UGU	0.000568134	1.594e-06	0.00053409	6.579e-06	3.57726e-06	0.9696	0.00018054	0.008273	0.00133351	2.853e-11	0.000152874	0.01629
	UUA	0.00083476	4.605e-05	0.00026683	0.1055	0.000393623	0.002944	0.000466516	0.07517	3.41527e-06	0.982	0.000183817	0.02636
	UUC	0.000631179	0.03725	-0.00125156	3.617e-10	-0.000763345	1.37e-05	-0.000380412	0.2082	-0.000830829	4.908e-09	0.000293409	0.004232
	UUG	0.000544863	0.002527	0.00121266	5.823e-10	0.000247727	0.08564	0.000729577	4.834e-05	0.00063714	3.367e-05	-0.000177762	0.04166
	UUU	0.000999981	8.091e-05	0.000596438	0.0006573	0.00103132	7.083e-06	0.00125981	0.001782	0.000353994	0.06847	0.000862085	3.659e-12

## Sheet: Table S7 
Table S7: Distance between the oligonucleotide frequency of SARS-CoV-2 isolated in each elapsed month and that of human-CoV.
		Clade_G									Clade_GH								Clade_GR								Clade_L							Clade_V					Clade_S
		2020_01	2020_02	2020_03	2020_04	2020_05	2020_06	2020_07	2020_08	2020_09	2020_02	2020_03	2020_04	2020_05	2020_06	2020_07	2020_08	2020_09	2020_02	2020_03	2020_04	2020_05	2020_06	2020_07	2020_08	2020_09	2019_12	2020_01	2020_02	2020_03	2020_04	2020_05	2020_06	2020_02	2020_03	2020_04	2020_05	2020_06	2020_01	2020_02	2020_03	2020_04	2020_05	2020_06
	A	0.000658788	0.000654894	0.000654442	0.000655232	0.000654915	0.000654583	0.00065869	0.00065753	0.000654756	0.000657529	0.000654888	0.000655254	0.00065421	0.000654062	0.000654476	0.000655189	0.000655708	0.000658575	0.000658388	0.000660427	0.000659089	0.000658116	0.000656913	0.000658744	0.000660508	0.00065684	0.000656768	0.000657837	0.000657546	0.000659201	0.000656978	0.000651171	0.000657645	0.000655466	0.00065822	0.000654981	0.000661952	0.000657119	0.000657275	0.000656633	0.000657021	0.000657385	0.000658042
	C	0.00113773	0.00114085	0.00113499	0.00113396	0.00113199	0.00113275	0.0011276	0.00112627	0.00112642	0.00113219	0.00113476	0.00113403	0.00113351	0.0011315	0.00112993	0.00112307	0.00111674	0.00114356	0.00113969	0.0011389	0.00113586	0.00113697	0.00113612	0.00113074	0.00113084	0.00114777	0.00114707	0.00114502	0.00114419	0.00114194	0.00113908	0.00113607	0.00114474	0.00114236	0.00114085	0.00113582	0.00113519	0.0011461	0.00114514	0.0011386	0.00113849	0.00114278	0.00114332
	G	0.000177237	0.00017753	0.000176307	0.000175766	0.00017617	0.000177207	0.000180073	0.000178443	0.000178108	0.000178736	0.000177526	0.000177424	0.000177436	0.000179003	0.000179133	0.000178331	0.000178094	0.000180266	0.000178953	0.000178991	0.000179323	0.000180815	0.000181139	0.000179202	0.000180588	0.000178432	0.000178685	0.000178174	0.000177657	0.000177507	0.000177174	0.000178095	0.000180992	0.00017831	0.000178359	0.000177819	0.000181252	0.000178739	0.000177868	0.000177291	0.000177337	0.000179319	0.000179552
	U	0.00212375	0.00211999	0.00211542	0.0021173	0.00211264	0.00210949	0.00209998	0.00210167	0.00209807	0.00210875	0.00211169	0.00211169	0.00210907	0.00210068	0.00209884	0.0020935	0.00208659	0.00212087	0.00211978	0.00212222	0.00211454	0.0021092	0.00210479	0.00210735	0.00210589	0.0021298	0.00212785	0.00212875	0.00212888	0.0021293	0.00212256	0.00210483	0.00211833	0.00212038	0.0021231	0.00211228	0.00211214	0.00212698	0.00212896	0.00212087	0.00212126	0.00212093	0.00212205
	AA	0.000202031	0.000201441	0.000200731	0.000201351	0.000201294	0.000201196	0.000202967	0.00020208	0.000200563	0.00020143	0.000200823	0.0002011	0.00020085	0.000200545	0.000200585	0.000200622	0.000200666	0.000203245	0.000202783	0.000203822	0.000202831	0.000202539	0.000202319	0.000202428	0.0002035	0.000200465	0.000201073	0.000201408	0.000201109	0.000201841	0.000200753	0.000198451	0.000201523	0.000200478	0.000201833	0.000200498	0.000205041	0.000201489	0.000201342	0.000200881	0.000200813	0.000201792	0.000202365
	AC	0.000470637	0.000471707	0.000470875	0.000471143	0.000470466	0.000470426	0.000471732	0.000469791	0.000469116	0.000469458	0.000469824	0.000469539	0.000469633	0.000469009	0.000469328	0.000467961	0.00046648	0.000472496	0.000472544	0.000473108	0.0004721	0.000471596	0.000470806	0.000470841	0.000471062	0.00047052	0.000470945	0.000470679	0.000471928	0.000471766	0.000470626	0.000470966	0.000469727	0.000469143	0.000469538	0.000468524	0.000469468	0.000470925	0.000471161	0.00046988	0.000469889	0.000471274	0.000471242
	AG	1.25993e-05	1.23011e-05	1.23507e-05	1.24001e-05	1.22889e-05	1.22011e-05	1.19139e-05	1.21448e-05	1.21904e-05	1.22597e-05	1.21954e-05	1.22441e-05	1.21669e-05	1.20937e-05	1.2098e-05	1.21202e-05	1.21672e-05	1.2258e-05	1.22727e-05	1.23267e-05	1.22216e-05	1.21132e-05	1.19665e-05	1.23167e-05	1.22367e-05	1.26259e-05	1.24334e-05	1.24849e-05	1.25277e-05	1.25869e-05	1.25435e-05	1.1973e-05	1.24948e-05	1.25806e-05	1.268e-05	1.23977e-05	1.21815e-05	1.23959e-05	1.25549e-05	1.24681e-05	1.25247e-05	1.22573e-05	1.23826e-05
	AU	0.000190148	0.000191186	0.000190428	0.000190913	0.000190144	0.000189905	0.000189139	0.000188608	0.000188267	0.000188233	0.000188974	0.00018905	0.000189135	0.000188245	0.000188283	0.000187154	0.000186057	0.000191267	0.000191094	0.000191451	0.000190192	0.000189721	0.000189095	0.000189637	0.00018942	0.000189749	0.000189846	0.000189735	0.000190485	0.000190354	0.000189602	0.00018832	0.000189296	0.000189458	0.000189842	0.000188565	0.000189033	0.000189771	0.000190443	0.000189237	0.000189153	0.000189783	0.000190445
	CA	0.000331131	0.000330607	0.000330441	0.000329856	0.000329258	0.000329702	0.000330621	0.000329593	0.000329021	0.000329554	0.000330263	0.000329417	0.00032912	0.000328554	0.000328693	0.000328256	0.000327693	0.000330049	0.000330469	0.000329998	0.000329891	0.000329821	0.00032945	0.000329436	0.000329569	0.000330247	0.000330418	0.000330113	0.000330293	0.00032973	0.000329342	0.000330774	0.00033003	0.000330349	0.000329855	0.000329496	0.000330014	0.000331735	0.000331452	0.000331315	0.00033109	0.000331433	0.000330624
	CC	2.24872e-05	2.24453e-05	2.19447e-05	2.18284e-05	2.17877e-05	2.18191e-05	2.15664e-05	2.15417e-05	2.14987e-05	2.22465e-05	2.18667e-05	2.19201e-05	2.18749e-05	2.18885e-05	2.1742e-05	2.1294e-05	2.07682e-05	2.26634e-05	2.20055e-05	2.1908e-05	2.18298e-05	2.21151e-05	2.20896e-05	2.1356e-05	2.1567e-05	2.30598e-05	2.27033e-05	2.26824e-05	2.23317e-05	2.22228e-05	2.2204e-05	2.1082e-05	2.28894e-05	2.22152e-05	2.20611e-05	2.18033e-05	2.18532e-05	2.24454e-05	2.24368e-05	2.19779e-05	2.19482e-05	2.22051e-05	2.25054e-05
	CG	4.08212e-08	6.59745e-08	5.66746e-08	6.01702e-08	5.72926e-08	5.98075e-08	3.13602e-08	3.49472e-08	4.5244e-08	4.67099e-08	6.07506e-08	6.10967e-08	6.02338e-08	5.79814e-08	5.45709e-08	5.00034e-08	4.49624e-08	8.07014e-08	8.24138e-08	8.33709e-08	7.71814e-08	7.46397e-08	7.0694e-08	6.98456e-08	7.50258e-08	7.37599e-08	7.57803e-08	7.56209e-08	8.58492e-08	8.17877e-08	7.92884e-08	8.68347e-08	7.57439e-08	9.45501e-08	9.19088e-08	8.83393e-08	6.17733e-08	7.26764e-08	7.11695e-08	7.07014e-08	7.24051e-08	6.47366e-08	6.68266e-08
	CU	0.000112127	0.000112593	0.000112147	0.00011214	0.000112067	0.000111984	0.000111965	0.000111816	0.000111781	0.000111477	0.000112113	0.000112189	0.000112408	0.000112198	0.000112115	0.000111447	0.000111113	0.000112488	0.000112415	0.000112486	0.000111984	0.000111903	0.000112352	0.000111964	0.000111381	0.000113023	0.000113447	0.000113027	0.00011305	0.000112861	0.000112376	0.000113077	0.00011242	0.000112422	0.000112539	0.000111843	0.000112568	0.000112903	0.000112945	0.000112064	0.00011207	0.000113004	0.000112705
	GA	1.68493e-05	1.66285e-05	1.67565e-05	1.67556e-05	1.66627e-05	1.65632e-05	1.64217e-05	1.66548e-05	1.68339e-05	1.64307e-05	1.65071e-05	1.65217e-05	1.6379e-05	1.63449e-05	1.62981e-05	1.62345e-05	1.62246e-05	1.67651e-05	1.68689e-05	1.69046e-05	1.67689e-05	1.67329e-05	1.66694e-05	1.65374e-05	1.66385e-05	1.70952e-05	1.69893e-05	1.70735e-05	1.71044e-05	1.71722e-05	1.69257e-05	1.64721e-05	1.70682e-05	1.70896e-05	1.72146e-05	1.68126e-05	1.6762e-05	1.70459e-05	1.7087e-05	1.69747e-05	1.70511e-05	1.69246e-05	1.70605e-05
	GC	3.26554e-09	2.62071e-09	3.74818e-09	5.03483e-09	3.95544e-09	2.57509e-09	8.87842e-11	1.03493e-09	2.56913e-10	1.43691e-09	2.7574e-09	2.82976e-09	3.14798e-09	8.57892e-10	5.91368e-10	1.90227e-09	9.56951e-10	2.21278e-09	5.16125e-09	5.35323e-09	3.32217e-09	5.88103e-10	3.6543e-10	4.61271e-09	6.11467e-10	2.65201e-09	2.14586e-09	2.2062e-09	2.88072e-09	2.86711e-09	2.32668e-09	6.39995e-09	1.41272e-09	7.72135e-09	7.60381e-09	8.70658e-09	4.49715e-09	3.1309e-11	1.63328e-10	4.30597e-10	1.61765e-10	3.69436e-12	1.59295e-10
	GG	7.47191e-06	7.42572e-06	7.37576e-06	7.29853e-06	7.34331e-06	7.46267e-06	7.65602e-06	7.553e-06	7.58245e-06	7.40898e-06	7.44338e-06	7.37517e-06	7.37317e-06	7.56074e-06	7.51215e-06	7.55825e-06	7.57338e-06	8.05309e-06	7.98611e-06	7.94718e-06	8.04606e-06	8.13732e-06	8.25791e-06	8.06236e-06	8.17415e-06	7.67008e-06	7.71324e-06	7.66236e-06	7.63832e-06	7.63039e-06	7.65033e-06	7.72804e-06	7.8377e-06	7.73243e-06	7.6832e-06	7.7333e-06	7.86245e-06	7.72045e-06	7.62469e-06	7.65068e-06	7.65941e-06	7.69576e-06	7.70839e-06
	GU	0.000217549	0.000217089	0.000216724	0.000216779	0.000216397	0.000216229	0.000216873	0.000216898	0.000216683	0.000217337	0.000216557	0.000216841	0.000216414	0.000216262	0.000216413	0.000215553	0.00021496	0.000217231	0.00021709	0.000217442	0.000216324	0.000216414	0.000215898	0.000215514	0.00021578	0.000218367	0.000218061	0.000217966	0.000217752	0.000217814	0.000216504	0.00021644	0.000219821	0.000218972	0.000219635	0.000217449	0.000219727	0.000217154	0.000216943	0.000215918	0.000215929	0.000216997	0.000217272
	UA	0.000117778	0.000118038	0.000118012	0.000117886	0.000117238	0.000117311	0.000117069	0.000116997	0.000117055	0.000115779	0.000117021	0.000116675	0.000116347	0.000115682	0.000115568	0.000114998	0.000114598	0.00011792	0.000118241	0.00011809	0.000117339	0.000117313	0.000117298	0.000116447	0.000116534	0.000117603	0.000117782	0.000117632	0.000117915	0.000117638	0.000116897	0.000117273	0.000117684	0.000118297	0.000118279	0.00011729	0.000117785	0.000118785	0.000118571	0.000118191	0.000118094	0.000118507	0.000118369
	UC	5.24506e-05	5.29456e-05	5.25737e-05	5.2345e-05	5.2305e-05	5.26133e-05	5.20849e-05	5.21716e-05	5.27184e-05	5.2311e-05	5.31121e-05	5.297e-05	5.28628e-05	5.29945e-05	5.28559e-05	5.2297e-05	5.25692e-05	5.29425e-05	5.27949e-05	5.26105e-05	5.26317e-05	5.30425e-05	5.31845e-05	5.25369e-05	5.27111e-05	5.39053e-05	5.41483e-05	5.3876e-05	5.3732e-05	5.34988e-05	5.34465e-05	5.38838e-05	5.39398e-05	5.39781e-05	5.37983e-05	5.33233e-05	5.32517e-05	5.49511e-05	5.45956e-05	5.41881e-05	5.43395e-05	5.46312e-05	5.44935e-05
	UG	0.000205194	0.000206228	0.000204807	0.000205028	0.000204586	0.000204882	0.000203782	0.000203778	0.000204256	0.000206272	0.000205408	0.000205866	0.000205562	0.000205803	0.000205947	0.000204605	0.000203897	0.00020651	0.000205564	0.000206049	0.000205099	0.000205728	0.000204662	0.00020491	0.00020589	0.000207585	0.000207053	0.000206973	0.000207155	0.000207073	0.000206234	0.000204943	0.000209147	0.000208013	0.000208596	0.000206297	0.000207041	0.000206784	0.000206843	0.000205708	0.000206028	0.000206369	0.000207309
	UU	0.000791985	0.000789691	0.000787736	0.000787746	0.0007873	0.000785932	0.000780667	0.000782194	0.000781058	0.000785306	0.000788802	0.000788224	0.000787852	0.000784451	0.000782703	0.000781545	0.000780411	0.000789282	0.000789107	0.000789324	0.000788436	0.000785655	0.000786095	0.000786221	0.000784091	0.00079722	0.000797385	0.000797431	0.000796135	0.000796093	0.000795083	0.000788241	0.000786898	0.00078915	0.000789003	0.000787604	0.000784935	0.00079753	0.000798049	0.000794932	0.000795258	0.00079457	0.000792953
	AAA	4.48745e-05	4.43638e-05	4.43531e-05	4.44904e-05	4.45725e-05	4.45288e-05	4.50409e-05	4.50341e-05	4.43283e-05	4.45137e-05	4.446e-05	4.4419e-05	4.44444e-05	4.43475e-05	4.44366e-05	4.45218e-05	4.47397e-05	4.48365e-05	4.48285e-05	4.49844e-05	4.49374e-05	4.47657e-05	4.48197e-05	4.51341e-05	4.50593e-05	4.41309e-05	4.44311e-05	4.45807e-05	4.44028e-05	4.45677e-05	4.44997e-05	4.38775e-05	4.45494e-05	4.41072e-05	4.43218e-05	4.4388e-05	4.46045e-05	4.45589e-05	4.4464e-05	4.44622e-05	4.42634e-05	4.44286e-05	4.44287e-05
	AAC	6.35079e-05	6.39428e-05	6.30346e-05	6.30299e-05	6.30788e-05	6.33377e-05	6.34695e-05	6.29707e-05	6.31191e-05	6.34468e-05	6.33621e-05	6.33993e-05	6.33282e-05	6.34883e-05	6.33719e-05	6.29991e-05	6.29584e-05	6.44014e-05	6.37468e-05	6.3778e-05	6.38268e-05	6.41414e-05	6.3821e-05	6.35649e-05	6.38822e-05	6.37699e-05	6.38185e-05	6.37131e-05	6.34805e-05	6.34055e-05	6.34542e-05	6.33171e-05	6.38635e-05	6.30069e-05	6.29817e-05	6.2966e-05	6.46455e-05	6.38003e-05	6.38353e-05	6.31484e-05	6.33096e-05	6.37858e-05	6.44131e-05
	AAG	4.63691e-08	4.58175e-08	5.46259e-08	5.66722e-08	5.13406e-08	4.54656e-08	5.88499e-08	4.76491e-08	4.00519e-08	4.82499e-08	4.72953e-08	4.76479e-08	4.57226e-08	4.13138e-08	4.36046e-08	4.38475e-08	4.48616e-08	4.76704e-08	5.22935e-08	5.71106e-08	4.55782e-08	4.38668e-08	5.08343e-08	4.54216e-08	5.35082e-08	4.34039e-08	4.14081e-08	4.2267e-08	5.29205e-08	5.65422e-08	4.92828e-08	4.52749e-08	4.06581e-08	6.16237e-08	7.03975e-08	5.51484e-08	8.07548e-08	4.34566e-08	4.40425e-08	4.99698e-08	4.98571e-08	4.69004e-08	4.15014e-08
	AAU	4.47686e-07	4.59866e-07	4.41765e-07	4.30855e-07	4.31018e-07	4.35932e-07	4.54832e-07	4.21845e-07	4.08085e-07	4.41132e-07	4.54323e-07	4.40635e-07	4.43431e-07	4.47332e-07	4.52753e-07	4.2918e-07	4.48413e-07	4.69436e-07	4.47278e-07	4.28078e-07	4.40598e-07	4.58445e-07	4.69938e-07	4.59879e-07	4.50057e-07	4.60348e-07	4.58754e-07	4.52945e-07	4.6231e-07	4.46112e-07	4.74451e-07	4.95676e-07	4.52395e-07	4.47021e-07	4.23091e-07	4.51059e-07	4.66297e-07	4.53852e-07	4.57598e-07	4.4138e-07	4.37372e-07	4.39885e-07	4.47794e-07
	ACA	0.000112141	0.000111616	0.000111785	0.000111712	0.000111574	0.000111667	0.000112389	0.000111958	0.000111824	0.00011124	0.000111682	0.000111436	0.000111452	0.000111387	0.000111581	0.000111431	0.000111889	0.000111312	0.000111693	0.000111629	0.000111744	0.000111612	0.000111458	0.000111628	0.000111885	0.00011139	0.000111425	0.000111433	0.000111738	0.000111682	0.00011177	0.000112205	0.000111354	0.000111638	0.000111529	0.000111732	0.000111687	0.000111525	0.00011166	0.000111832	0.000111671	0.000111324	0.000111011
	ACC	1.54737e-05	1.54287e-05	1.51714e-05	1.51361e-05	1.51468e-05	1.51866e-05	1.52436e-05	1.49364e-05	1.46279e-05	1.52716e-05	1.50345e-05	1.50255e-05	1.50469e-05	1.50485e-05	1.5024e-05	1.49296e-05	1.47993e-05	1.54311e-05	1.51786e-05	1.51336e-05	1.51383e-05	1.51921e-05	1.52013e-05	1.49481e-05	1.50441e-05	1.56785e-05	1.56311e-05	1.56129e-05	1.54492e-05	1.54049e-05	1.54064e-05	1.50349e-05	1.56705e-05	1.53256e-05	1.52763e-05	1.52865e-05	1.51577e-05	1.56188e-05	1.5638e-05	1.54095e-05	1.54179e-05	1.5614e-05	1.5758e-05
	ACG	1.02684e-06	1.06334e-06	1.06151e-06	1.07016e-06	1.06933e-06	1.0648e-06	1.02363e-06	1.05006e-06	1.07254e-06	1.03696e-06	1.06569e-06	1.06548e-06	1.0675e-06	1.05909e-06	1.05504e-06	1.05579e-06	1.0499e-06	1.13427e-06	1.13321e-06	1.14162e-06	1.141e-06	1.12285e-06	1.10545e-06	1.14559e-06	1.13464e-06	1.0539e-06	1.06166e-06	1.06103e-06	1.07675e-06	1.07546e-06	1.07337e-06	1.09422e-06	1.05701e-06	1.06728e-06	1.07081e-06	1.06748e-06	1.10769e-06	1.05601e-06	1.05413e-06	1.04823e-06	1.04946e-06	1.04223e-06	1.0472e-06
	ACU	3.80626e-05	3.85424e-05	3.86388e-05	3.87757e-05	3.86314e-05	3.84997e-05	3.86844e-05	3.87447e-05	3.88903e-05	3.83664e-05	3.85229e-05	3.85838e-05	3.86091e-05	3.84786e-05	3.85304e-05	3.84843e-05	3.80784e-05	3.84508e-05	3.87451e-05	3.89721e-05	3.859e-05	3.84548e-05	3.85434e-05	3.86451e-05	3.84195e-05	3.78073e-05	3.80152e-05	3.79585e-05	3.84458e-05	3.84911e-05	3.80695e-05	3.8496e-05	3.7611e-05	3.7983e-05	3.82329e-05	3.77575e-05	3.80794e-05	3.79719e-05	3.79405e-05	3.79611e-05	3.79936e-05	3.82765e-05	3.80854e-05
	AGA	2.44504e-05	2.426e-05	2.44365e-05	2.44706e-05	2.43663e-05	2.42542e-05	2.43858e-05	2.44405e-05	2.43212e-05	2.39594e-05	2.40258e-05	2.40505e-05	2.39923e-05	2.39066e-05	2.3894e-05	2.40446e-05	2.4057e-05	2.43811e-05	2.44774e-05	2.45773e-05	2.44096e-05	2.42943e-05	2.42941e-05	2.44348e-05	2.43969e-05	2.42657e-05	2.43003e-05	2.42871e-05	2.44811e-05	2.45406e-05	2.43302e-05	2.39086e-05	2.42947e-05	2.44442e-05	2.45909e-05	2.42443e-05	2.44906e-05	2.43046e-05	2.43647e-05	2.4363e-05	2.44391e-05	2.43561e-05	2.43293e-05
	AGC	5.13454e-08	5.53697e-08	5.84291e-08	5.90118e-08	5.96549e-08	5.85781e-08	7.09413e-08	6.09652e-08	5.71536e-08	5.13387e-08	5.21986e-08	5.16238e-08	5.19629e-08	5.3156e-08	5.50308e-08	6.20864e-08	6.392e-08	5.24308e-08	5.20425e-08	5.30847e-08	5.50198e-08	5.9551e-08	6.39698e-08	5.07352e-08	5.69771e-08	4.59172e-08	5.08408e-08	5.12224e-08	5.36134e-08	5.32949e-08	5.56836e-08	5.26914e-08	5.18114e-08	5.42629e-08	5.442e-08	5.6096e-08	5.46867e-08	6.78325e-08	6.37863e-08	6.63943e-08	6.72902e-08	6.79512e-08	6.58541e-08
	AGG	1.22517e-07	1.31095e-07	1.19345e-07	1.2144e-07	1.1814e-07	1.16189e-07	9.64617e-08	1.0298e-07	1.10932e-07	1.40684e-07	1.2666e-07	1.32826e-07	1.29135e-07	1.22582e-07	1.26779e-07	1.10412e-07	1.08615e-07	1.12799e-07	1.02537e-07	1.0471e-07	9.77578e-08	1.02769e-07	9.04352e-08	8.76547e-08	9.46559e-08	1.44486e-07	1.30845e-07	1.36581e-07	1.28588e-07	1.29008e-07	1.27316e-07	1.01278e-07	1.43573e-07	1.29583e-07	1.34389e-07	1.23896e-07	1.29275e-07	1.28337e-07	1.40436e-07	1.24023e-07	1.28106e-07	1.26695e-07	1.39282e-07
	AGU	2.33457e-06	2.39207e-06	2.36095e-06	2.35062e-06	2.34977e-06	2.34984e-06	2.3755e-06	2.36661e-06	2.3595e-06	2.37872e-06	2.36935e-06	2.38482e-06	2.3829e-06	2.34821e-06	2.356e-06	2.26971e-06	2.22118e-06	2.38922e-06	2.36672e-06	2.36852e-06	2.32087e-06	2.33283e-06	2.31782e-06	2.26224e-06	2.29388e-06	2.36731e-06	2.38844e-06	2.37955e-06	2.36018e-06	2.35641e-06	2.29733e-06	2.34564e-06	2.38474e-06	2.33126e-06	2.34389e-06	2.30268e-06	2.51456e-06	2.29114e-06	2.30644e-06	2.25653e-06	2.262e-06	2.34303e-06	2.33952e-06
	AUA	2.7733e-05	2.7742e-05	2.76616e-05	2.76872e-05	2.75569e-05	2.75341e-05	2.73421e-05	2.74444e-05	2.76249e-05	2.70162e-05	2.73366e-05	2.72984e-05	2.72902e-05	2.71662e-05	2.71594e-05	2.70169e-05	2.70717e-05	2.77774e-05	2.77651e-05	2.78073e-05	2.76823e-05	2.75931e-05	2.74995e-05	2.75427e-05	2.75592e-05	2.76483e-05	2.76746e-05	2.7635e-05	2.77755e-05	2.77697e-05	2.75796e-05	2.77039e-05	2.77036e-05	2.78322e-05	2.78412e-05	2.77014e-05	2.75983e-05	2.76714e-05	2.77607e-05	2.7806e-05	2.77862e-05	2.75949e-05	2.772e-05
	AUC	3.49482e-06	3.5311e-06	3.4882e-06	3.48468e-06	3.4881e-06	3.5103e-06	3.37033e-06	3.46266e-06	3.53739e-06	3.52534e-06	3.61955e-06	3.62774e-06	3.60503e-06	3.60771e-06	3.57769e-06	3.60199e-06	3.65493e-06	3.51958e-06	3.51803e-06	3.52545e-06	3.53525e-06	3.58407e-06	3.56007e-06	3.51754e-06	3.50843e-06	3.5172e-06	3.54202e-06	3.51755e-06	3.52436e-06	3.52441e-06	3.47466e-06	3.49589e-06	3.53571e-06	3.58423e-06	3.59876e-06	3.47445e-06	3.37316e-06	3.51959e-06	3.50584e-06	3.48779e-06	3.51703e-06	3.51517e-06	3.49603e-06
	AUG	2.01e-05	2.03822e-05	2.01913e-05	2.02992e-05	2.01942e-05	2.01645e-05	1.99435e-05	2.0085e-05	2.00791e-05	2.01382e-05	2.02092e-05	2.02856e-05	2.02834e-05	2.02004e-05	2.02349e-05	2.01899e-05	2.02317e-05	2.02817e-05	2.02972e-05	2.04322e-05	2.01902e-05	2.01908e-05	2.01777e-05	2.03548e-05	2.03183e-05	1.98567e-05	1.99322e-05	1.99359e-05	2.01976e-05	2.02078e-05	2.00528e-05	1.99788e-05	2.00809e-05	2.00715e-05	2.02185e-05	1.98083e-05	1.98053e-05	1.98666e-05	1.98944e-05	1.97668e-05	1.98094e-05	1.99299e-05	1.99682e-05
	AUU	3.48721e-05	3.51226e-05	3.4972e-05	3.4973e-05	3.49515e-05	3.497e-05	3.46937e-05	3.44511e-05	3.43943e-05	3.49093e-05	3.50919e-05	3.50847e-05	3.50758e-05	3.49319e-05	3.48116e-05	3.4639e-05	3.41622e-05	3.52141e-05	3.50812e-05	3.50167e-05	3.49785e-05	3.50401e-05	3.49113e-05	3.46111e-05	3.45618e-05	3.51947e-05	3.51913e-05	3.5107e-05	3.4959e-05	3.48767e-05	3.48168e-05	3.42704e-05	3.47157e-05	3.48194e-05	3.47989e-05	3.45697e-05	3.4755e-05	3.51637e-05	3.53023e-05	3.48672e-05	3.48655e-05	3.51828e-05	3.51989e-05
	CAA	6.32406e-05	6.34313e-05	6.32102e-05	6.31329e-05	6.29587e-05	6.30782e-05	6.35961e-05	6.29346e-05	6.28552e-05	6.31978e-05	6.31206e-05	6.31523e-05	6.30379e-05	6.28931e-05	6.28285e-05	6.25283e-05	6.24457e-05	6.33707e-05	6.32751e-05	6.33445e-05	6.30232e-05	6.31322e-05	6.29614e-05	6.24663e-05	6.29245e-05	6.30835e-05	6.32443e-05	6.32127e-05	6.31833e-05	6.30964e-05	6.27359e-05	6.32092e-05	6.32804e-05	6.32458e-05	6.34241e-05	6.28081e-05	6.36859e-05	6.33836e-05	6.33249e-05	6.29046e-05	6.29544e-05	6.33986e-05	6.32186e-05
	CAC	3.6248e-05	3.62573e-05	3.62922e-05	3.63142e-05	3.62218e-05	3.62182e-05	3.59835e-05	3.62011e-05	3.60505e-05	3.60279e-05	3.59616e-05	3.58896e-05	3.58747e-05	3.58743e-05	3.5873e-05	3.61249e-05	3.58425e-05	3.61543e-05	3.63092e-05	3.63206e-05	3.62577e-05	3.61226e-05	3.59687e-05	3.62063e-05	3.61797e-05	3.6103e-05	3.61627e-05	3.6145e-05	3.6323e-05	3.62705e-05	3.60722e-05	3.64323e-05	3.60807e-05	3.62795e-05	3.62635e-05	3.62576e-05	3.6018e-05	3.655e-05	3.65175e-05	3.6667e-05	3.6659e-05	3.65809e-05	3.64391e-05
	CAG	5.82319e-06	5.76501e-06	5.78568e-06	5.77771e-06	5.76545e-06	5.75784e-06	5.72564e-06	5.73843e-06	5.61335e-06	5.5889e-06	5.64975e-06	5.62577e-06	5.63146e-06	5.57908e-06	5.59962e-06	5.50544e-06	5.56671e-06	5.79372e-06	5.79199e-06	5.77401e-06	5.79113e-06	5.75572e-06	5.70905e-06	5.85715e-06	5.82149e-06	5.87081e-06	5.84379e-06	5.84003e-06	5.81271e-06	5.79308e-06	5.81482e-06	5.69121e-06	5.83751e-06	5.80516e-06	5.77736e-06	5.76669e-06	5.6604e-06	5.82236e-06	5.84989e-06	5.79696e-06	5.78356e-06	5.74501e-06	5.7667e-06
	CAU	3.28206e-06	3.23039e-06	3.22952e-06	3.19034e-06	3.2107e-06	3.23341e-06	3.30279e-06	3.27558e-06	3.37713e-06	3.37818e-06	3.44194e-06	3.38823e-06	3.3836e-06	3.40198e-06	3.41589e-06	3.43843e-06	3.4459e-06	3.20709e-06	3.2071e-06	3.1594e-06	3.22774e-06	3.26211e-06	3.34809e-06	3.27677e-06	3.22172e-06	3.23648e-06	3.22119e-06	3.20411e-06	3.19339e-06	3.18843e-06	3.28263e-06	3.29335e-06	3.20256e-06	3.20093e-06	3.13861e-06	3.2568e-06	3.26266e-06	3.22538e-06	3.19369e-06	3.26591e-06	3.24667e-06	3.23236e-06	3.22138e-06
	CCA	6.19138e-06	6.23283e-06	6.06635e-06	5.97915e-06	6.02543e-06	6.09862e-06	6.08581e-06	5.97059e-06	5.94079e-06	6.27534e-06	6.13701e-06	6.11283e-06	6.10452e-06	6.17341e-06	6.1462e-06	5.97377e-06	5.78981e-06	6.30771e-06	6.05388e-06	5.95549e-06	6.04552e-06	6.18722e-06	6.16379e-06	5.9363e-06	6.03833e-06	6.3431e-06	6.26636e-06	6.24809e-06	6.03446e-06	5.98652e-06	6.06551e-06	5.82817e-06	6.31348e-06	5.94448e-06	5.82273e-06	5.94146e-06	6.28712e-06	6.10599e-06	6.14703e-06	5.97738e-06	5.97192e-06	6.08594e-06	6.20253e-06
	CCC	2.25072e-08	2.63403e-08	1.94479e-08	1.66477e-08	1.77913e-08	1.81354e-08	1.57285e-08	1.45437e-08	1.92747e-08	2.40647e-08	2.15689e-08	2.22301e-08	2.12128e-08	2.22349e-08	2.10069e-08	1.19489e-08	7.18218e-09	2.96795e-08	1.8994e-08	1.66975e-08	1.72442e-08	2.24809e-08	2.32634e-08	1.00876e-08	1.21989e-08	3.30579e-08	2.72075e-08	2.63284e-08	1.82592e-08	1.62835e-08	1.91607e-08	9.85531e-09	2.96654e-08	1.86612e-08	1.53665e-08	1.55139e-08	1.56934e-08	2.7681e-08	2.61431e-08	1.81924e-08	1.65878e-08	2.08679e-08	2.26617e-08
	CCG	3.30761e-08	3.77221e-08	3.52771e-08	3.68664e-08	3.56592e-08	3.44357e-08	2.62974e-08	3.02411e-08	3.64269e-08	3.36913e-08	3.73529e-08	3.72654e-08	3.56459e-08	3.43818e-08	3.42903e-08	3.5961e-08	3.72044e-08	3.53743e-08	3.82158e-08	3.90282e-08	3.74659e-08	3.62346e-08	3.61128e-08	3.55551e-08	3.6796e-08	3.5785e-08	3.61286e-08	3.65328e-08	3.8594e-08	3.87664e-08	3.71013e-08	3.33256e-08	3.54944e-08	4.00188e-08	4.07693e-08	3.75632e-08	3.22606e-08	3.68159e-08	3.56928e-08	3.74733e-08	3.71833e-08	3.5878e-08	3.35456e-08
	CCU	3.64172e-06	3.54397e-06	3.54074e-06	3.56201e-06	3.52034e-06	3.50724e-06	3.53542e-06	3.53386e-06	3.44405e-06	3.49016e-06	3.42155e-06	3.44781e-06	3.46594e-06	3.43585e-06	3.41112e-06	3.43478e-06	3.3963e-06	3.55188e-06	3.5445e-06	3.58519e-06	3.50448e-06	3.49326e-06	3.49087e-06	3.48751e-06	3.4844e-06	3.65862e-06	3.62539e-06	3.63431e-06	3.69411e-06	3.68994e-06	3.62569e-06	3.53192e-06	3.64452e-06	3.69796e-06	3.74584e-06	3.59999e-06	3.44585e-06	3.62598e-06	3.62919e-06	3.63799e-06	3.64395e-06	3.64084e-06	3.68115e-06
	CGA	8.27144e-08	9.5202e-08	8.37682e-08	8.315e-08	8.47543e-08	9.08625e-08	7.27402e-08	7.43815e-08	9.40783e-08	8.24083e-08	8.87546e-08	8.85894e-08	8.79827e-08	9.20798e-08	9.12458e-08	8.28573e-08	7.91843e-08	1.16317e-07	1.10759e-07	1.05917e-07	1.07636e-07	1.13946e-07	1.14453e-07	1.03573e-07	1.05763e-07	9.44807e-08	9.082e-08	9.16551e-08	8.84892e-08	8.5195e-08	8.84749e-08	7.60461e-08	9.18921e-08	9.03091e-08	8.52857e-08	8.48614e-08	8.75518e-08	9.17435e-08	9.2587e-08	8.7222e-08	8.92996e-08	8.97455e-08	9.52355e-08
	CGC	5.14365e-08	5.40977e-08	5.49346e-08	5.55948e-08	5.4472e-08	5.27362e-08	4.86106e-08	5.19947e-08	5.35365e-08	5.22971e-08	5.41005e-08	5.46037e-08	5.42403e-08	5.02687e-08	4.94252e-08	5.22556e-08	4.37853e-08	5.33635e-08	5.40854e-08	5.68078e-08	5.37016e-08	5.03654e-08	4.41527e-08	5.11329e-08	4.75529e-08	5.09159e-08	5.17476e-08	5.16341e-08	5.61901e-08	5.53438e-08	5.2828e-08	5.54145e-08	5.35145e-08	6.88187e-08	6.8671e-08	7.28898e-08	6.21563e-08	5.21375e-08	5.11594e-08	5.38011e-08	5.30319e-08	5.00405e-08	4.83891e-08
	CGG	1.59948e-07	1.69092e-07	1.65326e-07	1.68626e-07	1.65523e-07	1.64342e-07	1.49996e-07	1.60928e-07	1.65463e-07	1.64601e-07	1.6525e-07	1.66195e-07	1.66551e-07	1.64789e-07	1.60862e-07	1.66858e-07	1.63168e-07	1.65144e-07	1.68711e-07	1.71555e-07	1.66906e-07	1.64956e-07	1.65242e-07	1.63457e-07	1.64639e-07	1.62184e-07	1.63338e-07	1.63845e-07	1.69418e-07	1.6972e-07	1.67485e-07	1.78718e-07	1.37732e-07	1.41887e-07	1.44778e-07	1.38754e-07	1.29604e-07	1.59116e-07	1.6038e-07	1.59512e-07	1.60519e-07	1.60723e-07	1.62556e-07
	CGU	5.07143e-07	4.83114e-07	4.79019e-07	4.74806e-07	4.78315e-07	4.78549e-07	4.90487e-07	5.10991e-07	5.35247e-07	4.97387e-07	4.76486e-07	4.78403e-07	4.78836e-07	4.80238e-07	4.78424e-07	4.93678e-07	4.64637e-07	4.80793e-07	4.74178e-07	4.746e-07	4.76419e-07	4.82536e-07	4.74595e-07	4.7334e-07	4.54912e-07	4.4101e-07	4.32885e-07	4.34648e-07	4.26109e-07	4.25996e-07	4.28697e-07	4.07563e-07	3.9646e-07	3.99027e-07	3.98126e-07	4.04852e-07	4.29792e-07	4.36621e-07	4.41283e-07	4.36493e-07	4.36398e-07	4.48336e-07	4.53107e-07
	CUA	7.59115e-06	7.45564e-06	7.44804e-06	7.49414e-06	7.46017e-06	7.38258e-06	7.35292e-06	7.44608e-06	7.47814e-06	7.26095e-06	7.3733e-06	7.3994e-06	7.41715e-06	7.347e-06	7.3582e-06	7.38814e-06	7.4993e-06	7.37248e-06	7.44937e-06	7.52445e-06	7.47232e-06	7.35326e-06	7.32869e-06	7.5226e-06	7.43687e-06	7.68647e-06	7.71623e-06	7.70172e-06	7.83916e-06	7.87774e-06	7.76029e-06	7.72156e-06	7.55282e-06	7.68667e-06	7.74161e-06	7.67246e-06	7.33554e-06	7.67637e-06	7.69906e-06	7.71101e-06	7.7338e-06	7.65478e-06	7.64481e-06
	CUC	7.51779e-06	7.57916e-06	7.54849e-06	7.51412e-06	7.53113e-06	7.53018e-06	7.5672e-06	7.53404e-06	7.45864e-06	7.48946e-06	7.55998e-06	7.53241e-06	7.5765e-06	7.56699e-06	7.5693e-06	7.51891e-06	7.57299e-06	7.5694e-06	7.54337e-06	7.50321e-06	7.52711e-06	7.55461e-06	7.68403e-06	7.53651e-06	7.61574e-06	7.55911e-06	7.60462e-06	7.57327e-06	7.52719e-06	7.4915e-06	7.53207e-06	7.58658e-06	7.5789e-06	7.53933e-06	7.5005e-06	7.53708e-06	7.78827e-06	7.58212e-06	7.55843e-06	7.46585e-06	7.46372e-06	7.48988e-06	7.41986e-06
	CUG	8.9278e-07	8.88903e-07	8.94707e-07	8.96844e-07	8.96861e-07	8.94161e-07	8.79753e-07	9.07746e-07	8.88757e-07	8.59249e-07	8.95035e-07	8.9571e-07	9.08519e-07	8.88894e-07	8.75692e-07	8.93434e-07	9.32665e-07	8.80501e-07	9.02405e-07	9.08054e-07	9.0017e-07	8.68923e-07	9.05754e-07	9.13889e-07	8.8297e-07	8.65125e-07	8.91775e-07	8.8797e-07	9.11558e-07	9.1988e-07	9.04501e-07	9.65936e-07	8.70863e-07	9.06867e-07	9.08142e-07	9.26447e-07	8.74235e-07	8.76175e-07	8.63747e-07	8.46394e-07	8.49868e-07	8.74184e-07	8.33659e-07
	CUU	1.71862e-05	1.75181e-05	1.7361e-05	1.7317e-05	1.73283e-05	1.7432e-05	1.74802e-05	1.72076e-05	1.73383e-05	1.76407e-05	1.74485e-05	1.74722e-05	1.74059e-05	1.75374e-05	1.7541e-05	1.72347e-05	1.66766e-05	1.76475e-05	1.74257e-05	1.73528e-05	1.72717e-05	1.7521e-05	1.73829e-05	1.7123e-05	1.7043e-05	1.74611e-05	1.74046e-05	1.73172e-05	1.70688e-05	1.69615e-05	1.69631e-05	1.69568e-05	1.73718e-05	1.70533e-05	1.70386e-05	1.67808e-05	1.74724e-05	1.73655e-05	1.74297e-05	1.72801e-05	1.7235e-05	1.7559e-05	1.77708e-05
	GAA	1.92051e-05	1.91617e-05	1.92299e-05	1.93321e-05	1.92421e-05	1.91353e-05	1.91698e-05	1.91591e-05	1.91216e-05	1.91271e-05	1.91701e-05	1.92445e-05	1.91527e-05	1.90682e-05	1.90422e-05	1.90681e-05	1.90354e-05	1.91722e-05	1.92886e-05	1.9436e-05	1.91812e-05	1.90539e-05	1.88999e-05	1.90509e-05	1.90865e-05	1.9102e-05	1.91123e-05	1.91241e-05	1.92762e-05	1.93675e-05	1.91042e-05	1.87219e-05	1.91123e-05	1.92779e-05	1.95201e-05	1.91068e-05	1.91535e-05	1.9112e-05	1.90636e-05	1.91179e-05	1.91588e-05	1.91521e-05	1.91171e-05
	GAC	1.36184e-05	1.35894e-05	1.36519e-05	1.36658e-05	1.36061e-05	1.35785e-05	1.35557e-05	1.35482e-05	1.35428e-05	1.36351e-05	1.36597e-05	1.36435e-05	1.36346e-05	1.35689e-05	1.35756e-05	1.35177e-05	1.35385e-05	1.35993e-05	1.36423e-05	1.37042e-05	1.36095e-05	1.35393e-05	1.34293e-05	1.35692e-05	1.35136e-05	1.365e-05	1.36299e-05	1.36548e-05	1.36738e-05	1.37297e-05	1.3556e-05	1.35877e-05	1.36592e-05	1.3658e-05	1.37253e-05	1.35879e-05	1.36667e-05	1.36687e-05	1.36703e-05	1.36135e-05	1.36118e-05	1.3654e-05	1.36226e-05
	GAG	1.343e-06	1.31292e-06	1.30562e-06	1.31332e-06	1.29624e-06	1.29445e-06	1.2194e-06	1.30965e-06	1.37046e-06	1.23166e-06	1.23714e-06	1.24722e-06	1.23969e-06	1.22551e-06	1.21841e-06	1.23634e-06	1.21538e-06	1.32316e-06	1.33733e-06	1.33838e-06	1.33256e-06	1.31028e-06	1.30719e-06	1.32228e-06	1.31135e-06	1.33683e-06	1.306e-06	1.32712e-06	1.3316e-06	1.33672e-06	1.32596e-06	1.26606e-06	1.32354e-06	1.32876e-06	1.33285e-06	1.297e-06	1.2426e-06	1.30215e-06	1.32563e-06	1.30522e-06	1.31237e-06	1.27306e-06	1.33076e-06
	GAU	2.62779e-05	2.63165e-05	2.62992e-05	2.64708e-05	2.63207e-05	2.62803e-05	2.61321e-05	2.62167e-05	2.6212e-05	2.62455e-05	2.62436e-05	2.63338e-05	2.63611e-05	2.61514e-05	2.61572e-05	2.62693e-05	2.61924e-05	2.62371e-05	2.63587e-05	2.65685e-05	2.62889e-05	2.59913e-05	2.57268e-05	2.63262e-05	2.61189e-05	2.58725e-05	2.58458e-05	2.58926e-05	2.60669e-05	2.61814e-05	2.59277e-05	2.57719e-05	2.58827e-05	2.60518e-05	2.6293e-05	2.5953e-05	2.59502e-05	2.58141e-05	2.58129e-05	2.5843e-05	2.58268e-05	2.5863e-05	2.58663e-05
	GCA	1.15768e-09	1.6481e-09	2.07778e-09	2.56948e-09	2.12565e-09	1.94466e-09	6.90342e-10	1.52596e-09	1.92651e-09	9.04877e-10	1.69898e-09	1.77662e-09	1.78849e-09	6.99465e-10	6.89512e-10	2.06232e-09	1.50922e-09	1.21058e-09	2.80663e-09	3.19e-09	1.89638e-09	7.77187e-10	6.09055e-10	2.50213e-09	1.16694e-09	1.17069e-09	1.51098e-09	1.36845e-09	2.00735e-09	1.95514e-09	1.69399e-09	2.28915e-09	7.71704e-10	3.07259e-09	3.48867e-09	2.64537e-09	1.57479e-09	1.31761e-09	1.11945e-09	1.68889e-09	1.74288e-09	2.40692e-09	1.01126e-09
	GCC	6.34951e-10	1.05022e-09	4.69501e-10	2.46313e-10	6.08053e-10	1.01849e-09	2.65109e-09	2.36153e-10	5.45572e-12	1.01434e-09	7.22084e-10	5.04202e-10	5.15992e-10	9.61839e-10	1.17023e-09	7.41871e-10	5.96324e-10	7.65502e-10	2.96276e-10	1.616e-10	5.5587e-10	8.59788e-10	7.35666e-10	4.82734e-10	4.77158e-10	8.52058e-10	1.54131e-09	1.07842e-09	2.54203e-10	2.71947e-10	4.76621e-10	1.75035e-09	1.04908e-09	1.68803e-10	6.51505e-11	5.73052e-10	2.23184e-11	4.34864e-09	4.18474e-09	2.81603e-09	3.0764e-09	4.56797e-09	4.98083e-09
	GCG	6.37738e-07	6.30504e-07	6.26993e-07	6.23256e-07	6.29505e-07	6.33604e-07	6.27913e-07	6.47428e-07	6.67188e-07	6.34382e-07	6.34091e-07	6.33497e-07	6.35706e-07	6.38233e-07	6.3881e-07	6.36177e-07	6.37647e-07	6.29639e-07	6.26214e-07	6.23043e-07	6.34915e-07	6.38005e-07	6.35952e-07	6.44332e-07	6.43456e-07	6.43314e-07	6.40615e-07	6.43085e-07	6.27362e-07	6.27771e-07	6.31094e-07	6.26431e-07	6.35008e-07	6.05976e-07	6.02668e-07	5.98938e-07	6.50379e-07	6.49385e-07	6.48069e-07	6.42512e-07	6.41576e-07	6.57243e-07	6.50541e-07
	GCU	7.1835e-07	7.00572e-07	6.87259e-07	6.80575e-07	6.94745e-07	6.93009e-07	6.8099e-07	6.61811e-07	6.19629e-07	6.99943e-07	6.95278e-07	6.86917e-07	6.92294e-07	6.89466e-07	6.88618e-07	6.76971e-07	6.66613e-07	6.92109e-07	6.8489e-07	6.70657e-07	6.97188e-07	6.79147e-07	6.69157e-07	7.10476e-07	6.63413e-07	7.20753e-07	7.18241e-07	7.12449e-07	6.6637e-07	6.66762e-07	6.75652e-07	7.49409e-07	7.02298e-07	6.79613e-07	6.60873e-07	7.06466e-07	7.08446e-07	6.98842e-07	7.17039e-07	6.9486e-07	6.84468e-07	6.83383e-07	6.89336e-07
	GGA	1.09155e-07	1.0029e-07	1.00486e-07	1.02767e-07	9.99837e-08	9.64994e-08	8.59079e-08	9.61874e-08	9.56968e-08	1.04308e-07	1.02001e-07	1.05939e-07	1.03599e-07	9.9095e-08	9.79122e-08	9.27866e-08	9.64725e-08	8.20585e-08	8.44372e-08	8.74322e-08	8.32879e-08	8.14222e-08	7.8556e-08	8.03336e-08	7.68089e-08	1.29952e-07	1.24977e-07	1.2984e-07	1.30086e-07	1.31659e-07	1.21843e-07	1.06544e-07	1.29955e-07	1.28307e-07	1.33972e-07	1.16554e-07	1.12291e-07	1.23869e-07	1.24461e-07	1.17271e-07	1.15704e-07	1.13784e-07	1.21793e-07
	GGC	1.82081e-07	1.87544e-07	1.94779e-07	2.01256e-07	1.98787e-07	1.93143e-07	1.8984e-07	1.81303e-07	1.64242e-07	1.76084e-07	1.8242e-07	1.83567e-07	1.86327e-07	1.74665e-07	1.74339e-07	1.82522e-07	1.70889e-07	1.81276e-07	1.8928e-07	1.89516e-07	1.85471e-07	1.80293e-07	1.81629e-07	1.84638e-07	1.7317e-07	1.78109e-07	1.78408e-07	1.76451e-07	1.74187e-07	1.71009e-07	1.74331e-07	1.84989e-07	1.75299e-07	1.91979e-07	1.92042e-07	1.92095e-07	1.89593e-07	1.77811e-07	1.81791e-07	1.8442e-07	1.82828e-07	1.79369e-07	1.72374e-07
	GGG	2.14209e-11	1.05708e-11	1.14993e-11	1.16325e-13	3.94521e-12	9.53384e-11	1.40874e-09	6.42598e-10	1.05218e-10	2.36256e-11	2.66912e-11	3.69928e-12	1.97485e-12	1.03683e-10	6.56857e-11	2.6046e-11	1.1365e-11	5.49378e-09	5.33307e-09	4.9317e-09	5.59761e-09	6.66842e-09	8.5542e-09	5.11445e-09	6.43103e-09	1.94728e-09	1.94615e-09	1.58148e-09	1.2105e-09	1.1008e-09	1.49473e-09	1.41858e-09	1.76701e-09	1.24001e-09	9.85187e-10	1.11108e-09	5.34786e-10	1.97228e-09	1.54858e-09	1.15424e-09	1.14541e-09	1.15526e-09	1.67609e-09
	GGU	1.21468e-05	1.20608e-05	1.20429e-05	1.20429e-05	1.2035e-05	1.20684e-05	1.1979e-05	1.19666e-05	1.20163e-05	1.1986e-05	1.20475e-05	1.20272e-05	1.20247e-05	1.20705e-05	1.20113e-05	1.20933e-05	1.21684e-05	1.20799e-05	1.20988e-05	1.21075e-05	1.21135e-05	1.21153e-05	1.2163e-05	1.21151e-05	1.20897e-05	1.23128e-05	1.23322e-05	1.23092e-05	1.22919e-05	1.2278e-05	1.22116e-05	1.22403e-05	1.25047e-05	1.25422e-05	1.25605e-05	1.24319e-05	1.26508e-05	1.23286e-05	1.22711e-05	1.22804e-05	1.22662e-05	1.22569e-05	1.22456e-05
	GUA	4.40068e-06	4.40806e-06	4.45671e-06	4.48847e-06	4.43057e-06	4.39478e-06	4.48496e-06	4.53509e-06	4.45347e-06	4.37424e-06	4.39963e-06	4.42041e-06	4.40486e-06	4.34238e-06	4.37425e-06	4.39161e-06	4.3565e-06	4.38506e-06	4.47525e-06	4.51594e-06	4.41886e-06	4.38797e-06	4.38487e-06	4.4013e-06	4.37166e-06	4.35969e-06	4.38123e-06	4.39843e-06	4.46074e-06	4.47875e-06	4.33435e-06	4.39904e-06	4.58128e-06	4.62008e-06	4.68793e-06	4.53618e-06	4.53696e-06	4.40874e-06	4.39302e-06	4.36339e-06	4.36486e-06	4.41388e-06	4.37905e-06
	GUC	2.56276e-07	2.60059e-07	2.63922e-07	2.61292e-07	2.62263e-07	2.68979e-07	2.63778e-07	2.57427e-07	2.526e-07	2.33612e-07	2.59284e-07	2.48859e-07	2.46055e-07	2.48539e-07	2.50685e-07	2.43215e-07	2.53465e-07	2.56636e-07	2.64968e-07	2.58783e-07	2.68102e-07	2.64615e-07	2.71437e-07	2.74883e-07	2.64574e-07	2.58805e-07	2.65576e-07	2.66161e-07	2.64509e-07	2.63554e-07	2.76696e-07	2.78419e-07	2.5524e-07	2.61474e-07	2.50471e-07	2.7555e-07	2.44419e-07	2.96297e-07	2.94526e-07	3.00753e-07	2.97922e-07	2.93982e-07	2.90523e-07
	GUG	3.31922e-06	3.36166e-06	3.391e-06	3.38772e-06	3.3567e-06	3.36042e-06	3.46807e-06	3.39381e-06	3.32141e-06	3.35592e-06	3.35058e-06	3.35708e-06	3.34742e-06	3.34935e-06	3.36245e-06	3.34184e-06	3.41223e-06	3.36212e-06	3.38715e-06	3.40282e-06	3.33171e-06	3.33287e-06	3.29028e-06	3.30277e-06	3.32417e-06	3.47771e-06	3.46698e-06	3.44622e-06	3.49873e-06	3.47702e-06	3.41068e-06	3.4999e-06	3.4837e-06	3.56261e-06	3.59121e-06	3.50437e-06	3.46308e-06	3.47894e-06	3.41055e-06	3.40297e-06	3.40029e-06	3.45608e-06	3.38029e-06
	GUU	0.000128559	0.000127978	0.000127328	0.000127142	0.000127362	0.000127601	0.000126799	0.000126864	0.000127436	0.000127759	0.000127632	0.000127474	0.000127263	0.000127511	0.0001274	0.00012667	0.000126228	0.000128064	0.000127545	0.000127338	0.000127649	0.000127809	0.000127847	0.000127446	0.000127472	0.000128436	0.000128337	0.000128288	0.000127482	0.000127495	0.000127933	0.000127266	0.000128234	0.000127071	0.000126772	0.000126977	0.00012828	0.000128041	0.000128344	0.000127887	0.000127843	0.000128013	0.000128768
	UAA	2.32402e-05	2.3173e-05	2.33087e-05	2.3248e-05	2.3126e-05	2.30927e-05	2.31905e-05	2.30573e-05	2.30032e-05	2.30229e-05	2.32355e-05	2.31977e-05	2.31408e-05	2.29969e-05	2.29785e-05	2.28727e-05	2.2995e-05	2.28708e-05	2.30509e-05	2.29971e-05	2.28348e-05	2.27479e-05	2.25776e-05	2.26233e-05	2.25325e-05	2.30392e-05	2.31203e-05	2.3111e-05	2.32366e-05	2.31394e-05	2.29858e-05	2.32176e-05	2.31187e-05	2.32988e-05	2.33362e-05	2.30528e-05	2.22877e-05	2.31614e-05	2.30576e-05	2.30383e-05	2.29855e-05	2.30354e-05	2.26936e-05
	UAC	1.6146e-05	1.61286e-05	1.62996e-05	1.63358e-05	1.63253e-05	1.62212e-05	1.65816e-05	1.63511e-05	1.62033e-05	1.60768e-05	1.61807e-05	1.6174e-05	1.62425e-05	1.61142e-05	1.62408e-05	1.60779e-05	1.60141e-05	1.60955e-05	1.62415e-05	1.62619e-05	1.62162e-05	1.61028e-05	1.63164e-05	1.62212e-05	1.61984e-05	1.60392e-05	1.60518e-05	1.60578e-05	1.62209e-05	1.62054e-05	1.62545e-05	1.61849e-05	1.58493e-05	1.59885e-05	1.60165e-05	1.60327e-05	1.54342e-05	1.57779e-05	1.58083e-05	1.58688e-05	1.58022e-05	1.58018e-05	1.56556e-05
	UAG	6.31269e-08	6.5897e-08	7.74474e-08	8.17273e-08	7.57624e-08	7.24685e-08	9.18174e-08	8.84028e-08	6.80242e-08	3.75864e-08	4.94723e-08	4.79632e-08	4.95741e-08	4.05427e-08	4.4356e-08	4.31621e-08	4.62097e-08	7.6666e-08	9.01245e-08	9.49152e-08	8.68007e-08	7.78672e-08	9.35437e-08	9.12024e-08	9.4753e-08	5.47688e-08	5.84684e-08	6.00158e-08	7.41474e-08	7.54772e-08	6.72448e-08	7.98842e-08	5.56661e-08	7.71641e-08	8.15722e-08	7.45238e-08	8.44638e-08	5.97762e-08	5.72508e-08	6.1413e-08	5.97827e-08	5.97042e-08	5.80377e-08
	UAU	9.60273e-05	9.62757e-05	9.59385e-05	9.58743e-05	9.57266e-05	9.57301e-05	9.55229e-05	9.52987e-05	9.58004e-05	9.56212e-05	9.59983e-05	9.58166e-05	9.5723e-05	9.55273e-05	9.55821e-05	9.49357e-05	9.39565e-05	9.62952e-05	9.60986e-05	9.59512e-05	9.57652e-05	9.59573e-05	9.62986e-05	9.52703e-05	9.5318e-05	9.63647e-05	9.62312e-05	9.60964e-05	9.59302e-05	9.57805e-05	9.58054e-05	9.50278e-05	9.57344e-05	9.54732e-05	9.52692e-05	9.52726e-05	9.55032e-05	9.6298e-05	9.65311e-05	9.61969e-05	9.61208e-05	9.63942e-05	9.66802e-05
	UCA	2.5869e-05	2.5814e-05	2.59818e-05	2.59949e-05	2.5843e-05	2.57841e-05	2.59033e-05	2.59269e-05	2.58558e-05	2.57174e-05	2.58808e-05	2.5805e-05	2.57272e-05	2.5615e-05	2.56219e-05	2.5733e-05	2.58425e-05	2.57163e-05	2.59899e-05	2.60611e-05	2.59156e-05	2.5823e-05	2.58683e-05	2.59928e-05	2.58649e-05	2.56692e-05	2.58116e-05	2.57726e-05	2.60272e-05	2.60159e-05	2.57367e-05	2.63176e-05	2.57364e-05	2.61862e-05	2.63247e-05	2.5952e-05	2.55397e-05	2.64728e-05	2.62679e-05	2.64356e-05	2.64555e-05	2.63985e-05	2.62635e-05
	UCC	4.66666e-07	4.64367e-07	4.53142e-07	4.49275e-07	4.47557e-07	4.53143e-07	4.45928e-07	4.53316e-07	4.53502e-07	4.72864e-07	4.6151e-07	4.62549e-07	4.56638e-07	4.65496e-07	4.58247e-07	4.49925e-07	4.27387e-07	4.73435e-07	4.56454e-07	4.56974e-07	4.56683e-07	4.697e-07	4.5884e-07	4.60722e-07	4.61592e-07	4.76647e-07	4.64138e-07	4.64321e-07	4.59229e-07	4.62621e-07	4.53964e-07	4.35982e-07	4.71885e-07	4.57549e-07	4.55527e-07	4.36071e-07	4.38644e-07	4.65545e-07	4.69384e-07	4.64169e-07	4.70674e-07	4.6976e-07	4.84825e-07
	UCG	3.64101e-08	2.93529e-08	3.40801e-08	3.52175e-08	3.46657e-08	3.00399e-08	4.02196e-08	4.12132e-08	3.71724e-08	3.4435e-08	3.20566e-08	3.19018e-08	3.07754e-08	2.93291e-08	3.08646e-08	3.69175e-08	4.09861e-08	2.94337e-08	3.17355e-08	3.3844e-08	3.35288e-08	3.03428e-08	3.04104e-08	3.54011e-08	3.21961e-08	1.91636e-08	1.99458e-08	1.9742e-08	2.12028e-08	2.30403e-08	2.18964e-08	1.90461e-08	1.96245e-08	2.05045e-08	2.34293e-08	2.29073e-08	2.97174e-08	2.00343e-08	1.97434e-08	2.13818e-08	2.0627e-08	2.01396e-08	1.89565e-08
	UCU	2.77083e-06	2.83968e-06	2.77009e-06	2.73075e-06	2.76309e-06	2.80442e-06	2.75533e-06	2.75835e-06	2.87699e-06	2.75518e-06	2.8873e-06	2.87752e-06	2.88131e-06	2.91455e-06	2.91298e-06	2.82444e-06	2.95011e-06	2.85014e-06	2.78915e-06	2.73669e-06	2.77728e-06	2.84395e-06	2.90018e-06	2.75033e-06	2.80515e-06	2.97251e-06	3.01396e-06	2.96828e-06	2.87921e-06	2.83903e-06	2.92412e-06	2.84493e-06	2.97155e-06	2.87536e-06	2.82438e-06	2.87408e-06	3.05944e-06	2.98213e-06	2.95355e-06	2.83363e-06	2.84181e-06	2.92501e-06	2.88486e-06
	UGA	2.11507e-06	2.15495e-06	2.11098e-06	2.12938e-06	2.12872e-06	2.14238e-06	2.08817e-06	2.07973e-06	2.07792e-06	2.09682e-06	2.11212e-06	2.12924e-06	2.15315e-06	2.13682e-06	2.13792e-06	2.141e-06	2.14054e-06	2.14729e-06	2.13245e-06	2.14356e-06	2.12653e-06	2.12403e-06	2.13472e-06	2.18471e-06	2.1395e-06	2.11982e-06	2.13007e-06	2.12139e-06	2.15235e-06	2.13519e-06	2.13504e-06	2.06252e-06	2.12794e-06	2.14715e-06	2.14289e-06	2.1094e-06	2.18632e-06	2.11301e-06	2.12135e-06	2.10341e-06	2.10135e-06	2.11424e-06	2.12034e-06
	UGC	1.36331e-07	1.44523e-07	1.39145e-07	1.37393e-07	1.38474e-07	1.4172e-07	1.44595e-07	1.39953e-07	1.45717e-07	1.47048e-07	1.43354e-07	1.46038e-07	1.44965e-07	1.46153e-07	1.44859e-07	1.3149e-07	1.13124e-07	1.45255e-07	1.35037e-07	1.36905e-07	1.36712e-07	1.44923e-07	1.32552e-07	1.31208e-07	1.36598e-07	1.45604e-07	1.42724e-07	1.39642e-07	1.35972e-07	1.32771e-07	1.31079e-07	1.25046e-07	1.48765e-07	1.4416e-07	1.44716e-07	1.42934e-07	1.47159e-07	1.47072e-07	1.50145e-07	1.46711e-07	1.4873e-07	1.505e-07	1.52655e-07
	UGG	1.21004e-05	1.22163e-05	1.20108e-05	1.19865e-05	1.19603e-05	1.20322e-05	1.1748e-05	1.18686e-05	1.21364e-05	1.22416e-05	1.21581e-05	1.21598e-05	1.2127e-05	1.22276e-05	1.21866e-05	1.21473e-05	1.21103e-05	1.23013e-05	1.21479e-05	1.21621e-05	1.21279e-05	1.22389e-05	1.21726e-05	1.20291e-05	1.22047e-05	1.23072e-05	1.22493e-05	1.22834e-05	1.22482e-05	1.22545e-05	1.22082e-05	1.21197e-05	1.23008e-05	1.21375e-05	1.2174e-05	1.20403e-05	1.2245e-05	1.2212e-05	1.22379e-05	1.21417e-05	1.22038e-05	1.22254e-05	1.23372e-05
	UGU	8.13981e-05	8.13761e-05	8.13768e-05	8.15188e-05	8.12689e-05	8.10917e-05	8.13961e-05	8.12247e-05	8.07198e-05	8.15922e-05	8.12594e-05	8.13739e-05	8.11336e-05	8.11065e-05	8.13168e-05	8.0869e-05	8.0954e-05	8.13833e-05	8.14771e-05	8.16487e-05	8.12125e-05	8.11267e-05	8.08848e-05	8.10992e-05	8.13791e-05	8.21525e-05	8.19438e-05	8.19517e-05	8.20739e-05	8.21753e-05	8.18305e-05	8.17276e-05	8.30638e-05	8.27202e-05	8.30232e-05	8.21462e-05	8.14637e-05	8.18889e-05	8.17449e-05	8.14708e-05	8.14769e-05	8.15035e-05	8.17058e-05
	UUA	3.90195e-05	3.88469e-05	3.87188e-05	3.86292e-05	3.85194e-05	3.85177e-05	3.8261e-05	3.81732e-05	3.83178e-05	3.80428e-05	3.85525e-05	3.83942e-05	3.83103e-05	3.81059e-05	3.7985e-05	3.78227e-05	3.78202e-05	3.85769e-05	3.86858e-05	3.85925e-05	3.84979e-05	3.84342e-05	3.84547e-05	3.82985e-05	3.82468e-05	3.93487e-05	3.94327e-05	3.93229e-05	3.94061e-05	3.92758e-05	3.92394e-05	3.90383e-05	3.84198e-05	3.87567e-05	3.86423e-05	3.85841e-05	3.8417e-05	3.98422e-05	3.97599e-05	3.95522e-05	3.9576e-05	3.97661e-05	3.9686e-05
	UUC	4.50709e-06	4.55828e-06	4.50673e-06	4.48286e-06	4.44893e-06	4.48496e-06	4.48329e-06	4.45533e-06	4.61426e-06	4.56188e-06	4.52261e-06	4.53974e-06	4.51013e-06	4.54128e-06	4.52548e-06	4.4078e-06	4.35212e-06	4.59706e-06	4.53736e-06	4.53353e-06	4.47088e-06	4.52779e-06	4.46742e-06	4.42737e-06	4.46791e-06	4.8809e-06	4.86187e-06	4.82696e-06	4.82323e-06	4.78572e-06	4.73118e-06	4.79518e-06	4.86545e-06	4.83207e-06	4.84079e-06	4.70446e-06	4.72039e-06	5.00905e-06	4.94983e-06	4.89957e-06	4.92504e-06	5.00429e-06	5.06172e-06
	UUG	8.03678e-05	8.02163e-05	7.96147e-05	7.9569e-05	7.96566e-05	7.98676e-05	7.90525e-05	7.93396e-05	7.97516e-05	8.05062e-05	8.01498e-05	8.02594e-05	8.02346e-05	8.03618e-05	8.01876e-05	7.97234e-05	7.91362e-05	8.05137e-05	7.99558e-05	7.99637e-05	8.01364e-05	8.02194e-05	8.0143e-05	7.99602e-05	8.02332e-05	8.13818e-05	8.11325e-05	8.11406e-05	8.06858e-05	8.07909e-05	8.08039e-05	8.03051e-05	8.18635e-05	8.11082e-05	8.10668e-05	8.10267e-05	8.11386e-05	8.08923e-05	8.10865e-05	8.05101e-05	8.06542e-05	8.06216e-05	8.10941e-05
	UUU	0.000226418	0.000226516	0.000226193	0.000226294	0.000225965	0.000225182	0.000224334	0.00022469	0.000224085	0.000225407	0.000226391	0.00022637	0.000226224	0.00022497	0.000224495	0.000224173	0.000224017	0.000226491	0.000226618	0.000226918	0.000225994	0.000224923	0.000224831	0.000225267	0.000224085	0.000229494	0.000229553	0.000229582	0.000229405	0.000229248	0.000228335	0.000226604	0.000225221	0.000226601	0.000226903	0.000225576	0.000224395	0.000230013	0.000229774	0.000229273	0.000229308	0.000229068	0.000227993

## Sheet: Table S8 
Table S8: Correlation coefficients for time-series changes in distance between the oligonucleotide frequency of SARS-CoV-2 and that of human-CoV.
		Clade_G		Clade_GH		Clade_GR		Clade_L		Clade_V		Clade_S
		r	p	r	p	r	p	r	p	r	p	r	p
	A	-0.0094037	0.980844	-0.361748	0.378573	0.0929988	0.82663	-0.461332	0.297427	0.463736	0.354259	0.60843	0.276204
	C	-0.945251	0.000119817	-0.834289	0.0100091	-0.948055	0.000336895	-0.978851	0.000123527	-0.975013	0.00092874	-0.350015	0.563622
	G	0.520965	0.150392	0.257703	0.537774	0.375444	0.359397	-0.675642	0.0957321	0.00284944	0.995726	0.456312	0.43985
	U	-0.969923	1.50866e-05	-0.921351	0.00114562	-0.913895	0.00149468	-0.725157	0.0651677	-0.661003	0.1529	-0.730896	0.160641
	AA	0.0223019	0.954586	-0.788312	0.0201096	-0.259414	0.53498	-0.439598	0.323683	0.596371	0.211496	0.519527	0.369613
	AC	-0.583091	0.0993608	-0.806014	0.0156974	-0.867636	0.00523734	0.245296	0.595987	-0.380527	0.45676	0.155437	0.802891
	AG	-0.766208	0.0160462	-0.712165	0.047488	-0.27215	0.514355	-0.571031	0.180575	-0.671461	0.144176	-0.44321	0.454749
	AU	-0.861109	0.00286249	-0.757082	0.0296244	-0.883916	0.00357815	-0.455365	0.304538	-0.469913	0.347013	0.124621	0.841739
	CA	-0.727221	0.0264071	-0.92605	0.000955745	-0.854003	0.00695292	-0.156773	0.737112	-0.451146	0.369193	-0.817852	0.0907264
	CC	-0.929326	0.000288219	-0.872111	0.00474051	-0.751359	0.031619	-0.905274	0.00503756	-0.897559	0.0152037	-0.0918662	0.883197
	CG	-0.46468	0.207583	-0.391444	0.337572	-0.815293	0.0136522	0.782049	0.037728	-0.396191	0.436808	-0.774837	0.123833
	CU	-0.811504	0.00791955	-0.394861	0.332992	-0.791066	0.0193779	-0.517105	0.234635	-0.151692	0.774207	-0.0994076	0.873639
	GA	-0.283542	0.459685	-0.898626	0.00241046	-0.795984	0.0181135	-0.619346	0.138022	-0.726348	0.102082	-0.294103	0.631007
	GC	-0.704623	0.0340477	-0.485438	0.222687	-0.434353	0.282223	0.631079	0.128552	0.376208	0.46231	-0.0381253	0.951469
	GG	0.602599	0.0858984	0.793587	0.018723	0.645877	0.0836223	0.0334391	0.943264	0.104069	0.84446	0.231477	0.707928
	GU	-0.512147	0.158661	-0.9123	0.00157732	-0.911833	0.0016021	-0.908849	0.00458468	-0.272685	0.60111	0.0662854	0.915665
	UA	-0.888148	0.00137908	-0.795859	0.0181449	-0.918608	0.00126703	-0.619624	0.137793	-0.297909	0.566357	-0.49745	0.393816
	UC	-0.32672	0.390811	-0.229634	0.584333	-0.0988554	0.81585	-0.578204	0.173899	-0.928325	0.00752176	-0.412252	0.490376
	UG	-0.798209	0.00991448	-0.745368	0.0337934	-0.521536	0.184973	-0.831125	0.020507	-0.812178	0.0496028	0.138678	0.823998
	UU	-0.950353	8.55066e-05	-0.825336	0.0116372	-0.918747	0.0012607	-0.778244	0.0393096	-0.500911	0.311476	-0.921008	0.0263327
	AAA	0.196615	0.612138	0.462456	0.248592	0.541809	0.165414	-0.189261	0.684423	0.313151	0.545628	-0.53014	0.358111
	AAC	-0.47095	0.200694	-0.746885	0.0332343	-0.46045	0.250922	-0.934558	0.00203093	0.321747	0.534033	0.367847	0.542431
	AAG	-0.167766	0.666146	-0.706354	0.0501787	-0.0882175	0.835448	0.475909	0.280367	0.766724	0.0752792	-0.0199648	0.974582
	AAU	-0.676757	0.0452805	-0.125447	0.767243	0.143384	0.734817	0.617234	0.139762	0.320866	0.535219	-0.573585	0.311989
	ACA	0.155903	0.68876	0.532378	0.174366	0.509653	0.196982	0.908573	0.00461876	0.794945	0.0587602	-0.677557	0.208835
	ACC	-0.842179	0.00439061	-0.847034	0.00795278	-0.753896	0.0307249	-0.912808	0.00411193	-0.870726	0.0239875	0.247896	0.687632
	ACG	0.1523	0.695672	0.00403847	0.992428	-0.140876	0.739332	0.914634	0.00390399	0.82333	0.0440613	-0.844515	0.0718569
	ACU	0.720533	0.0285371	-0.429442	0.288316	-0.336511	0.415057	0.727542	0.063853	0.451384	0.368908	0.675667	0.210608
	AGA	-0.163047	0.675113	0.0997443	0.814216	-0.333378	0.419686	-0.288692	0.530067	0.212927	0.685437	0.204361	0.741623
	AGC	0.559127	0.117558	0.86892	0.00509148	0.406682	0.317376	0.801626	0.0301565	0.77506	0.0702063	0.119252	0.848524
	AGG	-0.7863	0.0119674	-0.892015	0.00289852	-0.849537	0.00758384	-0.833889	0.019709	-0.733432	0.0971169	0.135617	0.827857
	AGU	0.14036	0.718714	-0.8307	0.0106432	-0.919328	0.00123438	-0.701771	0.0788254	0.439164	0.383604	0.515197	0.374332
	AUA	-0.714889	0.0304196	-0.397377	0.329639	-0.887373	0.00327672	0.120003	0.797741	-0.529812	0.279642	-0.184892	0.765936
	AUC	-0.227999	0.555178	0.511291	0.195303	0.0816141	0.847652	-0.673267	0.0973551	-0.74595	0.0886135	-0.25318	0.681119
	AUG	-0.567197	0.111223	0.192412	0.648033	-0.0705134	0.868225	0.498888	0.254398	-0.703505	0.118831	0.468473	0.426121
	AUU	-0.807829	0.00844088	-0.783938	0.0213063	-0.918177	0.00128685	-0.900548	0.00567482	-0.272955	0.600736	-0.0533109	0.932155
	CAA	-0.438485	0.237756	-0.954921	0.000221337	-0.810207	0.014751	-0.332549	0.466139	0.184571	0.726288	-0.136118	0.827225
	CAC	-0.692569	0.0386535	-0.158306	0.708098	-0.390786	0.338456	0.550321	0.200535	-0.191926	0.715647	-0.228987	0.711013
	CAG	-0.827144	0.00594429	-0.648214	0.0821415	0.193033	0.646953	-0.856584	0.0138274	-0.928958	0.00739116	-0.854606	0.0650803
	CAU	0.564074	0.11365	0.587093	0.125992	0.538785	0.168256	0.509267	0.243046	0.552086	0.256009	0.168122	0.786954
	CCA	-0.7491	0.0201751	-0.803223	0.016348	-0.397367	0.329653	-0.932578	0.00218567	-0.0394602	0.94084	0.170586	0.783861
	CCC	-0.684656	0.0418858	-0.821951	0.0122938	-0.656673	0.0769104	-0.942923	0.00144942	-0.802364	0.0547299	-0.521648	0.367308
	CCG	-0.367566	0.330463	0.146937	0.728433	-0.299768	0.4707	-0.133428	0.775497	-0.406765	0.423503	-0.598727	0.286054
	CCU	-0.781035	0.0129595	-0.708059	0.0493803	-0.813135	0.0141119	-0.458205	0.301145	-0.680289	0.136983	0.853788	0.0656218
	CGA	-0.182293	0.638766	-0.253015	0.545455	-0.479485	0.229257	-0.857611	0.0135891	-0.725748	0.102507	0.208798	0.736095
	CGC	-0.285081	0.457146	-0.716951	0.0453386	-0.6988	0.0538107	0.692182	0.0848287	0.44519	0.376332	-0.612097	0.272505
	CGG	-0.293335	0.44363	-0.289794	0.486292	-0.559386	0.149411	0.868191	0.0112705	-0.536373	0.272597	0.85825	0.0626848
	CGU	0.495802	0.174666	-0.403333	0.321765	-0.624538	0.0978603	-0.861449	0.0127191	0.826951	0.0423278	0.775146	0.123585
	CUA	-0.529486	0.142646	0.669752	0.0692156	0.0431211	0.919248	0.388534	0.389042	-0.438038	0.384968	-0.418812	0.482779
	CUC	-0.418749	0.261959	0.445999	0.268029	0.433948	0.282724	-0.285811	0.534364	0.573156	0.234409	-0.881399	0.0481486
	CUG	0.0472494	0.903923	0.574357	0.136482	0.0672601	0.874267	0.876852	0.0095555	0.173969	0.741679	-0.564728	0.321261
	CUU	0.0123839	0.974775	-0.717105	0.0452705	-0.793278	0.0188027	-0.944749	0.00133759	-0.0404088	0.93942	0.638282	0.246487
	GAA	-0.459152	0.213763	-0.735566	0.0375437	-0.62706	0.0961099	-0.348793	0.443222	-0.080475	0.879548	0.520947	0.36807
	GAC	-0.727364	0.0263625	-0.905172	0.00198307	-0.646222	0.0834027	-0.352294	0.438339	-0.178445	0.735174	-0.549549	0.337309
	GAG	-0.102002	0.793996	-0.583076	0.12925	-0.642328	0.085901	-0.494152	0.259656	-0.815243	0.0480492	-0.0196055	0.975039
	GAU	-0.529806	0.142359	-0.37342	0.362203	-0.433654	0.283086	0.0827887	0.859935	0.0354522	0.946844	0.895987	0.0396342
	GCA	-0.0561501	0.885912	0.0909226	0.830457	-0.319751	0.440078	0.843688	0.0170241	0.166892	0.751987	0.24804	0.687454
	GCC	0.0101559	0.979312	-0.0453779	0.915033	0.114462	0.787251	-0.0309977	0.947402	-0.599631	0.208354	0.284222	0.64305
	GCG	0.603866	0.0850653	0.751826	0.0314533	0.867789	0.00521976	-0.845211	0.0166267	0.164404	0.755616	0.301283	0.622279
	GCU	-0.833028	0.00529787	-0.886006	0.00339385	-0.174409	0.679555	-0.107974	0.817764	0.299639	0.563993	-0.680967	0.205648
	GGA	-0.736642	0.0235878	-0.844779	0.00829489	-0.745908	0.0335939	-0.651797	0.112672	-0.800684	0.0556311	-0.523032	0.365805
	GGC	-0.438506	0.237731	-0.397276	0.329774	-0.594537	0.120079	0.122612	0.793408	0.622527	0.186837	-0.444918	0.452801
	GGG	0.488595	0.182004	0.165921	0.69456	0.425877	0.292779	-0.696151	0.0823153	-0.920666	0.00919108	-0.411834	0.490861
	GGU	-0.783103	0.0125635	0.765515	0.0268292	0.373242	0.362451	-0.882106	0.00859387	0.359191	0.484385	-0.871718	0.0540808
	GUA	0.539889	0.133513	-0.409547	0.313645	-0.505146	0.201641	0.155483	0.739223	-0.428012	0.397187	-0.20856	0.73639
	GUC	-0.143317	0.712988	0.257153	0.538673	0.673649	0.0670144	0.843414	0.0170962	-0.100459	0.849818	-0.50619	0.384191
	GUG	0.23595	0.541072	0.484146	0.224105	-0.758022	0.0293041	-0.0374948	0.936392	-0.290986	0.57584	-0.509516	0.380543
	GUU	-0.700387	0.0356234	-0.861792	0.00593475	-0.352661	0.39154	-0.824943	0.0223567	-1.36138e-05	0.99998	0.39625	0.509011
	UAA	-0.778691	0.0134183	-0.661817	0.0738266	-0.886119	0.00338408	0.253648	0.583111	-0.708709	0.114917	-0.827727	0.0835804
	UAC	0.446879	0.227843	-0.310615	0.453973	0.258533	0.536417	0.832877	0.0199991	-0.495006	0.318137	-0.528057	0.360362
	UAG	0.491822	0.178697	0.0607104	0.886447	0.476421	0.232677	0.865334	0.011872	0.768809	0.0739951	-0.107368	0.863558
	UAU	-0.776247	0.0139082	-0.791424	0.019284	-0.715009	0.0462036	-0.913124	0.00407554	-0.544194	0.26429	0.362812	0.548398
	UCA	-0.0518966	0.894514	-0.15906	0.706755	0.101616	0.810777	0.694678	0.0832436	-0.30985	0.550099	-0.362305	0.549
	UCC	-0.622849	0.0731796	-0.812737	0.0141977	-0.195992	0.641817	-0.891523	0.00701585	-0.942629	0.00484269	0.754845	0.14023
	UCG	0.520237	0.151065	0.494116	0.213285	0.345362	0.402096	0.350394	0.440986	0.902404	0.0138227	-0.323676	0.595196
	UCU	0.220869	0.567942	0.572004	0.138471	0.0254838	0.952239	-0.784134	0.0368766	0.29352	0.572364	-0.499667	0.391369
	UGA	-0.673125	0.0468989	0.741645	0.0351893	0.270657	0.516758	-0.401119	0.372473	0.43832	0.384626	0.0849617	0.891954
	UGC	0.521026	0.150336	-0.738303	0.0364722	-0.477146	0.231866	-0.993354	6.89034e-06	-0.2965	0.568283	0.735142	0.156964
	UGG	-0.446829	0.227901	-0.500534	0.206469	-0.408754	0.314675	-0.853771	0.0144924	-0.329539	0.523584	0.545747	0.341361
	UGU	-0.681982	0.043016	-0.823452	0.0119999	-0.516414	0.1901	-0.594675	0.159041	-0.880392	0.0206035	-0.502846	0.387867
	UUA	-0.956543	5.39829e-05	-0.724107	0.0422362	-0.927461	0.000903076	-0.79865	0.0312468	-0.192155	0.715315	-0.344762	0.569893
	UUC	0.0656804	0.866677	-0.807055	0.0154589	-0.853078	0.00708061	-0.863015	0.0123737	-0.88717	0.0183778	0.398914	0.505899
	UUG	-0.666142	0.0501137	-0.784001	0.0212888	-0.203011	0.629684	-0.915792	0.00377533	-0.690434	0.128914	-0.0515225	0.934428
	UUU	-0.937339	0.00019066	-0.816139	0.0134746	-0.891432	0.00294438	-0.805069	0.0289221	-0.412898	0.41585	-0.926006	0.023892

## Sheet: Table S9 
Table S9:List of RNA-binding motifs.
A1CF	AUAAUUA, AUAAUUG, UGAUCAGUAUA, UUAAUUA, UUAAUUG
ACO1	CAGUGA, CAGUGC, CAGUGG, CAGUGU
ADAR	GCGC, GCGCG
AGO1	ACUCU, UGAGGUAGUA
AGO2	AAAAAAAAA, UAAAGUGCUU
AKAP1	AUAUAUAU
ANKHD1	AGACGAA, AGACGAU, AGACGUA, AGACGUU
CELF1	CUGUCUG, UGUGU, UGUGUG, UGUGUG, UGUGUGU, UGUGUGUG, UGUGUGUGU, UGUGUGUGUG, UGUGUGUGUGU, UGUGUUGUGUGU, UGUU, UGUUU, UGUUUGU, UUGUG, UUGUU
CELF2	AUGUG, AUGUGU, AUGUU, CAUCG, CGUGU, GUAUGU, GUCUGU, GUGUG, GUGUGU, GUUGU, GUUGUU, UAUGU, UAUGUG, UAUGUU, UGUGU, UGUGU, UGUGUG, UGUU, UGUUC, UGUUG, UGUUGU, UGUUU, UUGUGU, UUGUU, UUGUU
CELF4	GGUGUGG, GGUGUGU, GGUGUUG, GGUGUUU, UGUGUGG, UGUGUGU, UGUGUUG, UGUGUUU
CELF5	UGUGUGG, UGUGUGU, UGUGUUG, UGUGUUU
CELF6	UGUGAGG, UGUGAUG, UGUGGGG, UGUGGUG, UGUGUGG, UGUGUUG
CMTR1	GAUC
CNOT4	GACAGA
CPEB1	UUUUA
CPEB2	CAUUUUU, CCUUUUU, CUUUUUU
CPEB4	CUUUA, UUUUUU
CSTF2	GUGUGUGUUG, GUGUGUGUUUG, GUGUGUGUUUUG, UGUGUGUU
DAZAP1	AAAAAAA, AAUUUA, AGAAC, AGAUAU, AGUAGG, GGGGGGG, GUAACG, UAGGAAA, UAGGAAG, UAGGAUA, UAGGAUG, UAGGUAA, UAGGUAG, UAGGUUA, UAGGUUG, UAGUAAA, UAGUAAG, UAGUAUA, UAGUAUG, UAGUUAA, UAGUUAG, UAGUUUA, UAGUUUG, UUUUUUU
DDX19B	UUUUUU, UUUUUUU
DDX58	CGUCG, GCGCGC, GGCG
DHX58	GCGCG
DHX9	CGCG, GCGC, GCGCG
EIF4A3	UUUUUU, UUUUUU, UUUUUU
EIF4B	CUCGGAA, CUCGGAC, CUUGGAA, CUUGGAC, GUCGGAA, GUCGGAC, GUUGGAA, GUUGGAC
ELAVL1	AUUU, AUUUA, AUUUAUUUAUUU, AUUUU, CCCCCCC, UUAGUUU, UUAUUUAUU, UUAUUUU, UUAUUUU, UUGAUUU, UUGGUUU, UUGUUUU, UUGUUUU, UUUAGUU, UUUAUUU, UUUAUUU, UUUAUUU, UUUAUUUAUUU, UUUAUUUAUUUA, UUUGGUU, UUUGUUU, UUUGUUU, UUUGUUU, UUUGUUU, UUUU, UUUUU, UUUUUUG, UUUUUUU, UUUUUUU, UUUUUUU, UUUUUUU, UUUUUUU
ELAVL2	AAUUUAUUUAA, AAUUUAUUUAG, AAUUUAUUUUA, AAUUUAUUUUG, AUUUA, AUUUACUUU, AUUUAUACU, AUUUAUAUA, AUUUAUUUU, AUUUC, AUUUG, AUUUUAUUUAA, AUUUUAUUUAG, AUUUUAUUUUA, AUUUUAUUUUG, AUUUUC, AUUUUUA, AUUUUUC, AUUUUUUUA, CUUUA, CUUUAAUUU, CUUUC, CUUUCUUUU, CUUUUA, CUUUUU, CUUUUUA, CUUUUUG, GAAA, GAUUUAUUUAA, GAUUUAUUUAG, GAUUUAUUUUA, GAUUUAUUUUG, GUUUA, GUUUC, GUUUUAUUUAA, GUUUUAUUUAG, GUUUUAUUUUA, GUUUUAUUUUG,…
ELAVL3	AUUUA, AUUUAUUUUA, UAUUUAUUUU, UUUUUUU
ELAVL4	AAAAAAA, AUUU, AUUUAUUUAUUU, UAUUUAUUUA, UUAUUUAUUU, UUUAUUUAUUU, UUUAUUUAUUUA, UUUGUAUCUAAU, UUUUUUAUUUU, UUUUUUU, UUUUUUU
ENOX1	AAGACAG, AAUACAG, AGGACAG, AGUACAG, CAGACAG, CAUACAG, CGGACAG, CGUACAG, UAGACAG, UAUACAG, UGGACAG, UGUACAG
ERI1	AGCC, UUUCAGA
ESRP1	AGGGAU
ESRP2	UGGGAAA, UGGGAAG, UGGGAAU, UGGGGAA, UGGGGAG, UGGGGAU
F2	GAAG
FMR1	AAAAAAA, AAGCGGCUGG, GAGCGAAGGGAG, GAGCGACUGG, GAGCGACUGG, GAGCGACUGGUG, GAGCGGCUGG, GAGCGGCUGG, GCUGC, GGACAAG, GGACAGG, GGACUAAGGAGU, GGGCAUAGGCAC, GGGCGAAGGAAG, GGGCGAAGGAAG, GGGCGAAGGAAU, GGGCGAAGGAGG, GGGCGAAGGAGU, GGGCGAAGGAGU, GGGCGAAGGGAG, GGGCUAAGGAAG, GGGCUAAGGAAU, GGGCUAAGGAAU, GGGCUAAGGAGG, GGGCUAAGGAGU, GGGCUAAGGAGU, GGGCUAAGGAUU, GGGCUAUGGAGU, GGGCUGAGGAUG, GGGGGGG, GGGGGGG, GGGGGGG…
FUS	AAAAAAA, CGGUGA, CGGUGG, GGGGGGG, GGGGGGG, GGGUGA, GGGUGC, GGGUGG, GGGUGU, GGUG, UGGUGA, UGGUGG, UGGUGU, UUUUUUU
FXR1	ACGACA, ACGACG, AUGACA, AUGACG
FXR2	AGACAAA, AGACAAG, AGACAGA, AGACAGG, AGACGAA, AGACGAG, AGACGGA, AGACGGG, GGACAAA, GGACAAG, GGACAGA, GGACAGG, GGACGAA, GGACGAG, GGACGGA, GGACGGG, UGACAAA, UGACAAG, UGACAGA, UGACAGG, UGACGAA, UGACGAG, UGACGGA, UGACGGG
G3BP1	ACCCACACGCAC, ACCCACACGCAG, ACCCACACGCCC, ACCCACACGCCG, ACCCACAGGCAC, ACCCACAGGCAG, ACCCACAGGCCC, ACCCACAGGCCG, ACCCACCCGCAC, ACCCACCCGCAG, ACCCACCCGCCC, ACCCACCCGCCG, ACCCACCGGCAC, ACCCACCGGCAG, ACCCACCGGCCC, ACCCACCGGCCG, ACCCAUACGCAC, ACCCAUACGCAG, ACCCAUACGCCC, ACCCAUACGCCG, ACCCAUAGGCAC, ACCCAUAGGCAG, ACCCAUAGGCCC, ACCCAUAGGCCG, ACCCAUCCGCAC, ACCCAUCCGCAG, ACCCAUCCGCCC, ACCCAUCCGCCG, ACCCAUC…
G3BP2	AGGAUAA, AGGAUAG, AGGAUGA, AGGAUGG, AGGAUUA, AGGAUUG
GRSF1	AGGGA, AGGGG, AGGGU, GGGGA, GGGGG, GGGGU, UGGGA, UGGGG, UGGGU
HNRNPA0	AAUUUA, AGAUAU, AGUAGG, AUUUA
HNRNPA1	AAAAAAA, AAGGUG, AAUUUA, AGAAC, AGAUAU, AGUAGG, AUAGAA, AUAGCA, AUAGGGA, AUAGGGU, AUUUA, AUUUA, AUUUAA, AUUUAUUU, CAAAGAGGAA, CAGGGA, CAGGGA, CCCCCCC, CGUAGGUC, CUAGACUAGA, CUAGACUAGA, CUAGACUAGA, CUAGACUAGA, CUGAG, CUUAG, GAGGAAG, GAGGAAGGUG, GAGGAG, GAGUGGUGCG, GCCAAGGAGCC, GCCAAGGAGCC, GGAGGA, GUAAGUACGC, GUAGGGA, GUAGGGU, GUUUAGA, UACGGC, UAGACA, UAGACA, UAGAGA, UAGAGU, UAGAGU, UAGAGU, UAGAGU…
HNRNPA1L2	AUAGGGA, AUAGGGU, GUAGGGA, GUAGGGU, UUAGGGA, UUAGGGU
HNRNPA2B1	AAUUUA, AGAAC, AGAUAU, AGUAGG, AUAGCA, AUAGGGA, AUAGGGU, AUUUAA, CUAGACUAGA, GCCAAGAAGCC, GCCAAGGAACC, GCCAAGGAGCC, GCCAAGGAGCC, GCCAAGGAGCC, GCCAAGGGGCC, GCGAAGGAGCC, GUAGGGA, GUAGGGU, UAGACA, UUAGGGA, UUAGGGU, UUUAUA
HNRNPA3	GCCAAGGAGCC
HNRNPAB	ACAAAGACAAA, AUAGCA
HNRNPC	AUUUA, AUUUUUG, AUUUUUU, CUUUUUG, CUUUUUU, GCAUAC, GGAUAC, GGAUAU, GGAUUC, GGGGGGG, GGGGGGG, GGGUAC, UUUUU, UUUUU, UUUUUA, UUUUUC, UUUUUG, UUUUUU, UUUUUUG, UUUUUUU, UUUUUUU, UUUUUUU, UUUUUUU, UUUUUUU
HNRNPCL1	AUUUUUG, AUUUUUU, CUUUUUG, CUUUUUU, UUUUUUG, UUUUUUU
HNRNPD	AAAAAAA, AAUUUA, AGAUAU, AGUAGG, AUUUA, AUUUAUUUA, UUAGAG, UUAGGA, UUAGGG, UUAGGG
HNRNPDL	AACCUUGCC, AAUACCA, AAUUUA, ACACCAGAC, ACAUUAGCC, ACCACGCA, ACUAACAGCA, ACUAACU, ACUAAGUA, ACUAGAG, ACUAGCC, ACUAGCG, ACUAGCU, ACUAGGA, ACUGCA, ACUUUAA, AGAUAU, AGUAGCC, AGUAGG, AUCUGAC, AUGCGCA, AUUAGGCA, CCUUUAGGC, GAACUAAGC, GACUAGCA, GACUAGCG, GCACUAGAU, GCACUAGGC, GCGAGCA, GCUAGUA, GGACUAGCC, GGACUAGCU, GGAGUAGCC, GGAGUAGCU, GGAUUAGCC, UGUCGC
HNRNPF	AAGGCGAA, AAGGGGAA, AAGGUG, AGGGA, AGGGA, AGGGA, AGGGA, AGGGAAGGGA, AGGGAU, AGGGAU, AGGGC, AGGGG, AGGGG, AGGGG, AGGGGAGGGG, AGGGU, AGGGU, CGAUGGGAA, CGGGA, CGGGA, CGGGA, CGGGAUGGGGUA, CGGGC, CGGGGGGGGC, CUGGGGU, GAGGAAGGUG, GGAGGA, GGGAAUGUGGG, GGGGA, GGGGA, GGGGA, GGGGC, GGGGG, GGGGG, GGGGG, GGGGGCUG, GGGGGGG, GGGGGGG, GGGGU, GGGGU, GGGGU, UGGGA, UGGGA, UGGGA, UGGGC, UGGGG, UGGGG, UGGGG, UGGGGU,…
HNRNPH1	AAGAA, AAGGCGAA, AAGGGGAA, AAGGUG, AGAGA, AGAGG, AGGAG, AGGGA, AGGGA, AGGGA, AGGGA, AGGGA, AGGGAAGGGA, AGGGC, AGGGG, AGGGG, AGGGG, AGGGGAGGGG, AGGGU, AGGGU, AUCGGGCGU, AUUGGGUGU, CAGGAC, CGGGA, CGGGA, CGGGA, CGGGC, CGGGC, CGGGGGGGGC, CUGGGGGCUG, GAGGAAGGUG, GGAGGA, GGGA, GGGAAUGUGGG, GGGG, GGGGA, GGGGA, GGGGA, GGGGC, GGGGC, GGGGG, GGGGG, GGGGG, GGGGGCUG, GGGGGGG, GGGGGGG, GGGGU, GGGGU, GGGGU, GGG…
HNRNPH2	AAGAA, AAGGCGAA, AAGGGGAA, AAGGUG, AGAGA, AGAGG, AGGAG, AGGGA, AGGGA, AGGGA, AGGGA, AGGGA, AGGGAAGGGA, AGGGC, AGGGG, AGGGG, AGGGG, AGGGGAGGGG, AGGGU, AGGGU, AUCGGGCGU, AUUGGGUGU, CAGGAC, CGGGA, CGGGA, CGGGA, CGGGC, CGGGC, CGGGGGGGGC, CUGGGGGCUG, GGAGGA, GGGAAUGUGGG, GGGAGGG, GGGGA, GGGGA, GGGGA, GGGGC, GGGGC, GGGGG, GGGGG, GGGGG, GGGGG, GGGGGA, GGGGGCUG, GGGGGGG, GGGGGGG, GGGGU, GGGGU, GGGGU, GGG…
HNRNPH3	AAGGUG, AGGGA, AGGGA, AGGGA, AGGGA, AGGGA, AGGGAAGGGA, AGGGC, AGGGG, AGGGG, AGGGGAGGGG, AGGGU, AGGGU, AUCGGGCGU, AUUGGGUGU, CGGGA, CGGGA, CGGGA, CGGGC, CGGGC, CGGGGGGGGC, GGAGGA, GGGAAUGUGGG, GGGGA, GGGGA, GGGGA, GGGGG, GGGGG, GGGGG, GGGGGCUG, GGGGGGG, GGGGGGG, GGGGU, GGGGU, GGGUCGAGGGG, UGGGA, UGGGA, UGGGA, UGGGC, UGGGG, UGGGG, UGGGG, UGGGU, UGGGU, UGUGGG
HNRNPK	AAAAAAA, ACCCAA, ACCCAU, ACCCCAA, ACCCCCAA, ACCCCCAC, ACCCCCCCCCUA, ACCCGA, ACCCGC, ACCCGU, ACCCUU, CCAAACC, CCAACCC, CCAUACC, CCAUCCC, CCCCCCC, CCCCCCC, CCCCCCC, CCCCCCC, CCCCCCC, CCCCCCC, CCCCCCC, CCCCCCC, GCCCAA, GCCCAC, GCCCAG, GCCCCCCUA, GCCCCUA, GGGGGGG, GGGGGGG, GGGGGGG, UCCCAA, UCCCAA, UCCCAC, UCCCAU, UCCCCAA, UCCCCAA, UCCCCAA, UCCCCAU, UCCCCCAA, UCCCCCAU, UCCCCCCAA, UCCCCUA, UCCCCUU, UCC…
HNRNPL	AAACAAA, AAACACA, AAAUAAA, AAAUACA, AACA, ACAA, ACAC, ACACAAA, ACACAAA, ACACAAC, ACACAAG, ACACACA, ACACGAA, ACACGAC, ACACGAG, ACAU, ACAUAAA, ACAUACA, CACA, CACACCACA, CACC, CACC, CACG, CCAC, GCAC, UACA
HNRNPLL	ACAAACA, ACACACA, ACAUACA, CACACCACA, CACCGCA, CACUGCA, CAGACGACA, GCAAACA, GCACACA, GCAUACA
HNRNPM	GAAGGAA, GGGGGGG
HNRNPU	AAAAAAA, AAAAAAA, CCCCCCC, GGGGGGG, GGGGGGG, GGGGGGG, UUUUUUU, UUUUUUU
IFIH1	GGCCCU, GGGCCGCGGAU, UCCG
IGF2BP1	AAGCACCCGUU
IGF2BP2	AAAAACA, AAAAUCA, AAACACA, AAACUCA, AAAUACA, AAAUUCA, ACAAACA, ACAAUCA, ACACACA, ACACUCA, ACAUACA, ACAUUCA, CAAAACA, CAAAUCA, CAACACA, CAACUCA, CAAUACA, CAAUUCA, CCAAACA, CCAAUCA, CCACACA, CCACUCA, CCAUACA, CCAUUCA, GAAAACA, GAAAUCA, GAACACA, GAACUCA, GAAUACA, GAAUUCA, GCAAACA, GCAAUCA, GCACACA, GCACUCA, GCAUACA, GCAUUCA
IGF2BP3	AAAAACA, AAAAUCA, AAACACA, AAACUCA, AAAUACA, AAAUUCA, ACAAACA, ACAAUCA, ACACACA, ACACUCA, ACAUACA, ACAUUCA, CAUU
IGHMBP2	AAAAAAA, AAAAAAAA
KHDRBS1	AUAAAA, AUAAAAA, AUAAAAC, AUAAAAG, AUUUAA, AUUUAC, CAAAAU, CUAAAA, CUAAAU, GAAAAC, UUAAAA, UUAAAA, UUAAAU, UUUUA, UUUUAC, UUUUUU, UUUUUUU, UUUUUUU
KHDRBS2	AAUAAAA, AAUAAAC, GAUAAAA, GAUAAAC, UUUUUUU
KHDRBS3	AAAUAAA, AGAUAAA, AUAAAA, AUAAAAC, AUAAAC, AUAAAG, AUUAAAC, UAAAUAA, UUUUUUU
KHSRP	AGGG, AUGUAUAU, AUGUAUGU, AUGUGUAU, AUGUGUGU, AUUUUA, CACCCUCC, CACCUUCC, CAGCCUCC, CAGCUUCC, CCCCCUCC, CCCCUUCC, CCGCCUCC, CCGCUUCC, CGCCCUCC, CGCCUUCC, CGGCCUCC, CGGCUUCC, CUCCCUCC, CUCCUUCC, CUGCCUCC, CUGCUUCC, CUGUAUAU, CUGUAUGU, CUGUGUAU, CUGUGUGU, GGGU, GUGUAUAU, GUGUAUGU, GUGUGUAU, GUGUGUGU, UAGGG, UAGGUA, UAGGUU, UAGUAU, UAGUAU, UAUAUUUA, UAUAUUUU, UAUUAU, UAUUAU, UAUUAU, UAUUUA, UAUUUAUA…
LIN28A	AGGAGAA, AGGAGAU, AGGAGUA, CGGAGAA, CGGAGGA, CGGAGGG, CGGAGUA, UGGAGAA, UGGAGGA, UGGAGGG, UGGAGUA
MATR3	AAUCUUA, AAUCUUG, CAUCUUA, CAUCUUG
MBNL1	ACGCUA, ACGCUC, ACGCUG, ACGCUU, AUGCCA, AUGCCC, AUGCCG, AUGCUC, AUGCUU, CCCGCUGC, CCCGCUGU, CCCGCUUC, CCCGCUUU, CCGCUA, CCGCUC, CCGCUG, CCGCUU, CCUGCUGC, CCUGCUGU, CCUGCUUC, CCUGCUUU, CGCC, CGCU, CGCUGCGGC, CGCUUU, CUCGCUGC, CUCGCUGU, CUCGCUUC, CUCGCUUU, CUGCCA, CUGCCC, CUGCCG, CUGCCU, CUGCUA, CUGCUC, CUGCUG, CUGCUU, CUUGCUGC, CUUGCUGU, CUUGCUUC, CUUGCUUU, GCGCUC, GCGCUG, GCGCUU, GCGCUUGUGC, GCUU…
MSI1	UAGGAAG, UAGGAGG, UAGGUAG, UAGGUGG, UAGUAAG, UAGUAAG, UAGUAGG, UAGUAGG, UAGUUAG, UAGUUAG, UAGUUGG, UAGUUGG
NELFE	CUCUGGUUAG, GGUCUCUCUG, UCUGGCUAAC
NONO	AGGGA, GAGAGGAAC
NOVA1	AACACC, ACCACC, AGCACC, AUCAAC, AUCACC, AUCAUC, CAGUCAC, CCAC, CCAG, CCAU, CCCCCCC, GGGGGGG, UCAC, UCAC, UCAC, UCACC, UCAG, UCAGUCAC, UCAU, UCAU, UCAUUCAUUCAU, UGUGU, UUCAG, UUCAU, UUUUUUU
NOVA2	AACACC, ACCACC, AGCACC, AUCAAC, AUCAC, AUCACC, AUCAUC, CCUAGAUCACC, GAGACAU, GAGGCAU, GAGUCAU, GAUCACC, GGGGGGG, UCAC, UCAU, UUUUUUU
NUDT21	UGUA, UUGUA, UUGUA
NXF1	AACCUG, AGAC, CCUG
OAS1	AAAGC, GCAUAA, UUGA
PABPC1	AAAAA, AAAAAAA, AAAAAAA, AAAAAAA, AAAAAAAA, AAAAAAC, ACAAACA, ACAAACC, ACAAAUA, ACAAAUC, ACGAACA, ACGAACC, ACGAAUA, ACGAAUC, ACUAACA, ACUAACC, ACUAAUA, ACUAAUC, AGAAAAA, AGAAAAC
PABPC3	AAAAACA, AAAAACC, GAAAACA, GAAAACC
PABPC4	AAAAAAA, AAAAAAG
PABPC5	AGAAAAU, AGAAAGU, AGAAAUU
PABPN1	AAAAGA, AGAAGA
PCBP1	AAAAAAA, AAACCAAA, AAAUUACC, AAAUUCAC, AAAUUCCA, AAAUUCCC, ACAUUAAA, ACCUUAAA, CAAUUAAA, CCAAACC, CCAACCC, CCAAUCC, CCAUACC, CCAUCCC, CCAUUAAA, CCAUUCC, CCCCACCCUCUU, CCCCCCC, CCCCCCC, CCCCCCC, CCCCCCC, CCCCCCC, CCCUCCC, CCCUUAAA, CCCUUCCC, CCUAACC, CCUACCC, CCUAUCC, CCUUACC, CCUUCCC, CCUUUCC, GGGGGGG, GGGGGGG, GGGGGGG, UCCCCAA, UUAGAG, UUAGGA, UUAGGG, UUUUUUU, UUUUUUU, UUUUUUU
PCBP2	AAACCAAA, AAAUUACC, AAAUUCAC, AAAUUCCA, AAAUUCCC, ACAUUAAA, ACCUUAAA, CAAUUAAA, CCAUUAAA, CCAUUC, CCCCCCA, CCCCCCC, CCCCCCC, CCCCCCC, CCCCCCC, CCCCCCU, CCCU, CCCUAA, CCCUCCA, CCCUCCC, CCCUCCC, CCCUCCU, CCCUUAAA, CCCUUCCC, CCUCCCA, CCUCCCC, CCUCCCU, CCUUCCA, CCUUCCC, CCUUCCU, CUAACCCUAA, CUAACCCUAA, GGGGGGG, GGGGGGG, UCCCCA, UCCCCA, UUAGAG, UUAGGA, UUAGGG, UUUUUUU
PHAX	AUCG
PIWIL1	GCUU
PPIE	AAAAAA, AAAAAA, AAAAAU, AAAAUA, AAAAUU, AAAUAA, AAAUAU, AAAUUA, AAAUUU, AAUAAA, AAUAAA, AAUAAA, AAUAAU, AAUAUA, AAUAUU, AAUUAA, AAUUAU, AAUUUA, AAUUUU, AUAAAA, AUAAAU, AUAAUA, AUAAUU, AUAUAA, AUAUAU, AUAUUA, AUAUUU, AUUAAA, AUUAAU, AUUAUA, AUUAUU, AUUUAA, AUUUAU, AUUUUA, AUUUUU, UAAAAA, UAAAAU, UAAAUA, UAAAUU, UAAUAA, UAAUAU, UAAUUA, UAAUUU, UAUAAA, UAUAAU, UAUAUA, UAUAUU, UAUUAA, UAUUAU, UAUUUA,…
PPRC1	CCGCGCC, CCGCGCG, CGGCGCC, CGGCGCG, GCGCGCC, GCGCGCG, GGGCGCC, GGGCGCG
PTBP1	ACUUUCU, ACUUUUU, AUCUUC, AUUUUCU, AUUUUUU, CCCCCCC, CCUAA, CCUAC, CCUAG, CCUAU, CCUCA, CCUCC, CCUCG, CCUCU, CCUCUUU, CCUGA, CCUGC, CCUGG, CCUGU, CCUUA, CCUUC, CCUUCCUU, CCUUG, CCUUU, CCUUUCCC, CCUUUCU, CCUUUUU, CUAA, CUAC, CUAG, CUAU, CUCA, CUCC, CUCCAUCUU, CUCG, CUCU, CUCU, CUCUC, CUCUCU, CUCUCU, CUCUCU, CUCUCU, CUCUCU, CUCUCU, CUCUUA, CUCUUC, CUCUUG, CUCUUU, CUCUUU, CUGA, CUGC, CUGG, CUGU, CUU…
PTBP2	CUCUCU
PUM1	AAUUGUACAUAA, CCAGAAUUGUA, CUUGUAGAUAA, UGUAAAUA, UGUAAAUA, UGUAAAUA, UGUAAUAUU, UGUACAU, UGUACAUA, UGUACAUA, UGUACAUA, UGUACAUC, UGUAGAUA, UGUAUAU, UGUAUAUA, UGUAUAUA, UGUAUAUA, UGUCCAG, UUUAAUGUU
PUM2	UGUAAAUA, UGUAAAUA, UGUAAAUA, UGUAAAUA, UGUACAUA, UGUACAUA, UGUACAUA, UGUACAUC, UGUAGAUA, UGUAGAUA, UGUAUAUA, UGUAUAUA, UGUAUAUA
QKI	ACACACUAACCU, ACUAAC, ACUAAC, ACUAACA, ACUAACC, ACUAACG, ACUAAU, ACUUAU, AUCUAAUCAUAU, AUCUACUCAUAU, AUUAAC, CGAGU, CUAAU
RALY	UUUUUUC, UUUUUUG, UUUUUUU
RBFOX1	AGCAUG, AGCAUG, AGCAUGA, AGCAUGC, UGACUG, UGCAUG, UGCAUG, UGCAUG, UGCAUG, UGCAUG, UGCAUG, UGCAUGA, UGCAUGC, UGCAUGU
RBFOX2	UGACUG, UGCAUG, UGCAUG, UGCAUG, UGCAUG, UGCAUG
RBM14	GCGCGCC, GCGCGCG, GCGCGCG, GCGCGGC, GCGCGGG, GCGCGGG
RBM24	AGAGUGA, AGAGUGG, AGAGUGU, AGUGUGA, AGUGUGG, AGUGUGU, UGAGUGA, UGAGUGG, UGAGUGU, UGUGUGA, UGUGUGG, UGUGUGU
RBM25	AUCGGGCA, CGGGCA
RBM28	GAGUAGA, GAGUAGG, GAGUAGU, GUGUAGA, GUGUAGG, GUGUAGU
RBM3	AAAACGA, AAAACUA, AAGACGA, AAGACUA, AAUACGA, AAUACUA, GAAACGA, GAAACUA, GAGACGA, GAGACUA, GAUACGA, GAUACUA
RBM4	CCUCUUU, CCUUCCUU, CGCGCGA, CGCGCGG, GCGCGCG, GCGCGGG, GCGCGGU, UCCUUCUUG
RBM41	AUACAUG, AUACAUU, AUACUUG, AUACUUU, UUACAUG, UUACAUU, UUACUUG, UUACUUU
RBM42	AACUAAG, AACUACG
RBM46	AAUCAAA, AAUCAAG, AAUCAAU, AAUCAUA, AAUCAUG, AAUCAUU, AAUGAAA, AAUGAAG, AAUGAAU, AAUGAUA, AAUGAUG, AAUGAUU, GAUCAAA, GAUCAAG, GAUCAAU, GAUCAUA, GAUCAUG, GAUCAUU, GAUGAAA, GAUGAAG, GAUGAAU, GAUGAUA, GAUGAUG, GAUGAUU
RBM5	AAAAAAA, AGGUAA, CAAGGAG, CAAGGGG, CCCCCCC, CUCUUCUCU, GAAGGAA, GAAGGAG, GAAGGAG, GAAGGGG, GAAGGUA, GAAGGUG, GAGGGAA, GAGGGAG, GAGGGUA, GAGGGUG, GGGGGG, GGGGGGG, GGUGGU
RBM6	AAUCCAA, AAUCCAG, CAUCCAA, CAUCCAG, UAUCCAA, UAUCCAG
RBM8A	ACGCGCC, ACGCGCG, ACGCGCU, AUGCGCC, AUGCGCG, AUGCGCU, GCGCGCC, GCGCGCG, GCGCGCU, GUGCGCC, GUGCGCG, GUGCGCU
RBMS1	GAUAUAC, GAUAUAG, UAUAUAC, UAUAUAG
RBMS3	AAUAUA, AUAUAGA, AUAUAGC, AUAUAUA, AUAUAUC, CAUAUA, CUAUAGA, CUAUAGC, CUAUAUA, CUAUAUC, UAUAUA
RBMX	AAAAU, AAGAAGGAAGG, AAGU, AAGUAACAA, AAGUGUU, ACCAAA, AUCAAA, AUCCCA, AUCCCC, UAAGAC, UCAAA, UCAAAA
RBMY1A1	ACAAGAC, CACAA, CUCAA
RC3H1	CCUUCUGUG, UCCCUUCUGUG, UUUC
RNASEL	AAAA
SAMD4A	GCGGGAA, GCGGGAC, GCGGGCA, GCGGGCC, GCGGGUA, GCGGGUC, GCUGGAA, GCUGGAC, GCUGGCA, GCUGGCC, GCUGGUA, GCUGGUC
SART3	AAAAAAA, AAAAAAC, AGAAAAA, AGAAAAC
SF1	ACAGUCA, ACUAAU, ACUUAU, AUACUAACAA, AUUAAC, CACAGAC, CACCGAC, CACUGAC, CGCUGAC, GACUAAC, GACUAAC, UACGAAC, UACUAAC, UACUAAC, UACUAAC, UACUAAC, UACUAAG, UACUAAG, UACUAAU, UACUAGC, UACUGAC, UACUGAC, UAGUAAC, UAGUAAG, UAUACUAACAA, UGCUAAC, UGCUGAC, UGCUGAC, UGCUGCC
SFPQ	AAGGACC, AGAGGAA, AGAGGUA, GAAGAGGAA, GAAGGA, GAGAGGA, GGACUGGGA, GGAGGAAC, GGAGGG, GGGGGGGAUC, GGUAAGAGC, GUAAUGG, GUAAUGU, GUAAUUG, GUAAUUU, GUAGUGG, GUAGUGU, GUAGUUG, GUAGUUU, GUGAUGG, GUGAUGU, GUGAUUG, GUGAUUU, GUGGUGG, GUGGUGU, GUGGUUG, GUGGUUU, UAAGGGAUC, UAGAGAGG, UAGAUCGGAA, UAGGGGGAC, UCUAAGGAA, UGCAGGCA, UGGAAGAAC, UGGAGAGGAAC, UGGAGGAC, UGGUCUGGAGC, UUAAUGG, UUAAUGU, UUAAUUG, UUAAUUU, …
SNRNP70	AAUCAAG, AUUCAAG, GAUCAAG, GUUCAAG
SNRPA	AGGAGAU, AUGCACA, AUGCACG, AUUGCAC, AUUGCAC, AUUGCACC, GAGCAGUAGGC, GAGCAGUAGGG, GAGCAGUAGUC, GAGCAGUAGUG, GAUACCUGCUA, GAUUCCUGCUA, GGGUAUGCUG, GUUACCUGCUA, GUUUCCUGCUA, UUGCACA, UUGCACG
SNRPB2	GUAUUGCAGU
SRP14	CCUGU, CGCCUGUAG, GUGG
SRP19	CCUC, GAGC, GGAGC, UCGG
SRP54	AGGU, CCUC, GGAGC, UCGG
SRP68	CCUC, CUAAG, GGAGC, UAAG, UCGG, UGCUG
SRSF1	AAAAGAGAAG, AAAGAAGAA, AACACGA, AAGAGGA, AAGGUG, ACAAGGAC, ACGCGAG, ACGCGCA, ACGCGCA, ACGCGCC, ACGCGCG, ACGCGCU, ACGCUCA, AGAAGAAC, AGAAGAAC, AGAAGAGC, AGAAGGAC, AGACAGAGAC, AGAGCAGG, AGAGCAGG, AGAGGAAGGCGA, AGAUGGAC, AGCGAGC, AGGAAAGACC, AGGACA, AGGACAGAGC, AGGACAGAGC, AGGACC, AGGACGAAGC, AGGACGACGC, AGGACGGAAC, AGGACUGAGC, AGGAGA, AGGAGAAC, AGGAGC, AGGAGGA, AGGAGGA, AGGAGGAU, AGGAGGUAAC, AUGACA…
SRSF10	AAAAGAA, AAAGAAA, AAAGAAA, AAAGAAG, AAAGAAG, AAAGACAAA, AAAGAGA, AAAGAGG, AAAGGAA, AAAGGAG, AAAGGGA, AAAGGGG, ACAAAGACAAA, AGACAA, AGACAA, AGAGAAA, AGAGAAA, AGAGAAA, AGAGAAA, AGAGAAA, AGAGAAC, AGAGAAC, AGAGAAG, AGAGAAG, AGAGAAG, AGAGACA, AGAGACA, AGAGACC, AGAGACC, AGAGACG, AGAGAGA, AGAGAGA, AGAGAGA, AGAGAGA, AGAGAGC, AGAGAGC, AGAGAGG, AGAGAGG, AGAGAGG, AGAGGAA, AGAGGAG, AGAGGGA, AGAGGGG, GAAAGAA,…
SRSF11	AAGAAG
SRSF2	AAAAGAGAAG, AAGCAGUAGGG, AAGCAGUAGUC, ACGAGAG, ACGAGAGUU, ACGAGAU, AGAAG, AGAAGCGGA, AGAGAUGCUG, AGAGGAAGGCGA, AGAGGAAGGCGA, AGAUCC, AGCAG, AGCAGAGAU, AGCAGAGGA, AGCAGAGUA, AGCAGAGUA, AGCAGAGUU, AGCAGUGUU, AGCCCCCA, AGCCGAGAA, AGCCUCAG, AGCGGAGAA, AGCUCCCA, AGCUGUU, AGGAG, AGGAGAA, AGGAGAAUA, AGGAGAAUG, AGGAGAG, AGGAGAGGU, AGGAGAGUA, AGGAGAU, AGGAGAUAA, AGGAGCGUG, AGGAGGA, AGGAGUAUC, AGGAGUGAC, A…
SRSF3	AACUUUAU, ACAUCAUCU, ACAUCGACU, ACAUCGAUC, ACAUCGAUU, ACAUCGCUU, ACAUCGUUC, ACAUUCAU, ACUACGACG, ACUACGAUC, ACUUCGACU, AUCAUCAU, AUCUUCAC, AUCUUCAU, CACAUCAU, CACCACCACC, CACUACAC, CACUUCAG, CACUUCAU, CAUC, CAUCAAC, CAUCAU, CCUCGUCC, CCUCGUCC, CCUCUUCC, CGAUCGACU, CGCUUCAU, CUACAAA, CUACAAC, CUACAAU, CUACAGC, CUACGAC, CUCUUCAC, CUCUUCAC, CUUCAAC, CUUCAAC, CUUCAC, GACUUCAU, GACUUCUU, GAUC, GAUCAAC…
SRSF4	GAAGAAGA, GAGGAAGAA
SRSF5	AAAGG, ACACC, ACACG, ACAGC, ACAGG, ACCGC, ACGGC, ACGGG, ACUGC, ACUGG, AGAGG, AUAAAGG, CAACAGC, CACAGA, CACAGC, CACAUA, CACAUC, CACGGA, CACGGC, CACGUA, CACGUC, CCGCAGG, CGCAGA, CGCAGC, CGCAUA, CGCAUC, CGCGGA, CGCGGC, CGCGUA, CGCGUC, GAAGAAGA, GAGGAAGAA, GAGGAAGAA, GCAGC, GCAGG, GCUGC, UACAGA, UACAGC, UACAUA, UACAUC, UACGGA, UACGGC, UACGUA, UACGUC, UCCGC, UCGGG, UCUGG, UGCAGA, UGCAGC, UGCAUA, UGCAU…
SRSF6	ACCGGG, ACCGUC, AGCGGA, AUCGUA, CACGGA, CCACACG, CCACAGG, CCACUCG, CCACUGG, CCCGGC, CCUCACG, CCUCAGG, CCUCUCG, CCUCUGG, CGCGUC, CUACACG, CUACAGG, CUACUCG, CUACUGG, CUUCACG, CUUCAGG, CUUCUCG, CUUCUGG, GAAGAAGA, GACGUC, GAGGAAGAA, GAGGAAGAA, GAUCAACCUGGC, GCAGCACCUGGC, GCCGGA, GCCGUC, GCUCAUCCUGGC, UACGUC, UCACACG, UCACAGG, UCACUCG, UCACUGG, UCCGGA, UCUCACG, UCUCAGG, UCUCUCG, UCUCUGG, UGCGGA, UGCGG…
SRSF7	AAAGGACAAA, ACGAAUGAU, ACGACG, ACGAGACUA, ACGAGAGAA, ACGAGAGAC, ACGAGAGAC, ACGAGAGAU, ACGAGAGAU, ACGAGAUCA, ACGAUAGAA, ACGAUAGAC, ACGAUUGAC, ACGAUUGAU, ACUAGAGAC, AGACGACGAC, AGACGACGAU, AGACUACGAC, AGACUACGAU, AGAGGAAGGCGA, AGAGGAAGGCGA, CAGAGAGAC, CCGAGAUCA, CCGAGAUCU, CUCUUCAC, CUGAGAGAC, GAAGAAGAA, GAAGAAGAA, GACGACGAG, GGACGACGA, UAGAGAGAC, UCAACA, UCGAGAGAU, UCGAUUGAC, UCUCCG, UCUUCA, UCUUC…
SRSF9	AAGAC, ACCAC, AGAAC, AGCAC, AGCAG, AGGAA, AGGAAAA, AGGAAAG, AGGAACA, AGGAACG, AGGAC, AGGAC, AGGAC, AGGACAA, AGGACAG, AGGACCA, AGGACCG, AGGAG, AGGAG, AGGAGAA, AGGAGAG, AGGAGCA, AGGAGCG, AGGAU, AGGAU, AGGCA, AUGAAAA, AUGAAAG, AUGAACA, AUGAACG, AUGACAA, AUGACAG, AUGACCA, AUGACCG, AUGAGAA, AUGAGAG, AUGAGCA, AUGAGCG, CGGAC, CGGAG, CGGUG, CUGGAUU, GGAAGCA, GGAAGCC, GGAAGGA, GGAAGGC, GGAUGCA, GGAUGCC, G…
SSB	AUUU, UGCUG, UGCUGUUUU, UUUU
SUPV3L1	CCGCCC
SYNCRIP	AAAAAAA, AAAAAAA, AAAAAAA, UUUUUUU, UUUUUUU
TARDBP	GAAUGA, GAAUGG, GAAUGU, GUGAAUGA, GUUGUGC, GUUGUUC, GUUUUGC, UGUGUG, UGUGUGUG, UGUGUGUGUG, UGUGUGUGUGUG, UGUGUGUGUGUG, UGUGUGUGUGUG, UGUGUGUGUGUG
TIA1	AUUC, AUUUA, AUUUC, AUUUUC, AUUUUG, AUUUUUC, AUUUUUG, AUUUUUU, CUUC, CUUUA, CUUUC, CUUUG, CUUUUA, CUUUUC, CUUUUG, CUUUUUA, CUUUUUC, GUUUA, GUUUC, GUUUG, GUUUUA, GUUUUC, GUUUUG, GUUUUUC, GUUUUUG, GUUUUUUUUC, UUCUCCUUUC, UUUUUCG, UUUUUCU, UUUUUGG, UUUUUGU, UUUUUUAUUUU, UUUUUUC, UUUUUUG, UUUUUUG, UUUUUUU, UUUUUUU, UUUUUUUUU
TIAL1	AUUA, AUUC, AUUUA, AUUUC, AUUUUA, AUUUUC, AUUUUG, AUUUUUA, AUUUUUUUC, CUUUA, CUUUC, CUUUG, CUUUUA, CUUUUC, CUUUUG, CUUUUUA, CUUUUUC, CUUUUUG, CUUUUUUC, GUUUC, GUUUG, GUUUUC, GUUUUUC, GUUUUUG, GUUUUUUUC, GUUUUUUUUG, UUUUAAAUUUU, UUUUCAGUUUU, UUUUUUAUUUU
TRA2A	AAGAA, AAGAAGAA, AAGAAGAAGAA, AGAAAGAAGAAA, GAAGAGGAAG
TRA2B	AAGAA, AAGAAC, AAGAAG, AAGAAG, AAGAAGAA, AAGAAGAAG, AAGAAGAAG, AAGAAGAAGAA, AAUAAGAAG, AGAA, AGAAC, AGAAGGAAGG, GAAAGAAG, GAAAGAAG, GAAAGAAU, GAAAGAAU, GAAGAA, GAAGAAGGAAA, GAAGAAGGAAA, GAAGGA, GAAUUA, UCAAC
TUT1	AAAUACU, AGAUACU, CAAUACU, CGAUACU
U2AF2	UUUUU, UUUUUCC, UUUUUUC, UUUUUUU
XPO5	CCGC, GUUU
YBX1	AACAUC, AACAUCA, AACAUCG, AACAUCU, ACAAC, AGAAC, CAACCACAA, CAACCACAA, CAACCACACCAC, CACC, CACCACCACC, CAUC, CAUC, CAUCAUC, CAUCGC, CAUCUG, CCCUGCG, CCUGCGG, CUGCGGU, GAUC, GAUCUG, GCCUGCG, GGUCUGC, UCCAGCAA
YBX2	AACAACA, AACAACG, AACAACU, AACAUCA, AACAUCG, AACAUCU
YTHDC1	GAAUAC, GAAUGC, GACUAC, GACUGC, GAGUAC, GAGUGC, GCAUAC, GCAUGC, GCAUGC, GCCUAC, GCCUGC, GCGUAC, GCGUGC, GGAUAC, GGAUGC, GGCUAC, GGCUGC, GGGUAC, GGGUGC, UAAUAC, UAAUGC, UACUAC, UACUGC, UAGUAC, UAGUGC, UCAUAC, UCAUGC, UCCUAC, UCCUGC, UCGUAC, UCGUGC, UGAUAC, UGAUGC, UGCUAC, UGCUGC, UGGUAC, UGGUGC
ZC3H10	CCAGCGA, CCAGCGC, CGAGCGA, CGAGCGC, GCAGCGA, GCAGCGC, GGAGCGA, GGAGCGC
ZCRB1	GAAUUAA, GACUUAA, GAUUUAA, GGAUUAA, GGCUUAA, GGUUUAA
ZFP36	AAAAAACAAAG, AAAAAAGAAAG, AAAAAAUAAAG, AAAAAGCAAAG, AAAAAGGAAAG, AAAAAGUAAAG, AACAAACAAAG, AACAAAGAAAG, AACAAAUAAAG, AACAAGCAAAG, AACAAGGAAAG, AACAAGUAAAG, AAUAA, AAUAAACAAAG, AAUAAAGAAAG, AAUAAAUAAAG, AAUAAGCAAAG, AAUAAGGAAAG, AAUAAGUAAAG, ACCUCC, ACCUCU, ACCUGC, ACCUGU, ACCUUC, ACCUUU, ACUUCC, ACUUCU, ACUUGC, ACUUGU, ACUUUC, ACUUUU, AUUUA, CCCUCC, CCCUCU, CCCUGC, CCCUGU, CCCUUC, CCCUUU, CCUUCC,…
ZFP36L2	UUAUUUAUU, UUAUUUAUU
ZNF346	CCACC, GUGGU
ZNF638	CGUUCGU, CGUUCUU, CGUUGGU, CGUUGUU, GGUUCGU, GGUUCUU, GGUUGGU, GGUUGUU, UGUUCGU, UGUUCUU, UGUUGGU, UGUUGUU
ZRANB2	AGGGAA, AGGUAA, AGGUAC, AGGUAG, AGGUAU, AGGUCU, AGGUUA, AGGUUU, CGGUAA, CGGUAG, CGGUAU, CGGUCU, GAGGUU, GGGUAA, GGGUGA, GGUAAAGGU, GGUGGU, GGUGGUGGU, UGGUAA

[truncated: 3 more sheets: Table S10 , Table S11 , Table S12 ]
